# Supplementary material
Source: HighWire-hosted journal article supplement (https://bjsm.bmj.com/content/52/21/1376)
Supplement: inline-supplementary-material-1 [file inline-supplementary-material-1.docx]

**1) Additional results**

Study questionnaires included the Edinburgh Postnatal Depression Scale (EPDS), CES-D, Structured Clinical Interview Depression (SCID), Beck Depression Inventory II, Hospital Anxiety Depression Scale, International Classification of Diseases Tenth Revision (ICD-10), 36-Item Short Form Health Survey, Profile of Mood States, Cambridge Worry Scale, State-Trait Anxiety Inventory (STAI), Beck Anxiety Inventory, General Health Questionnaire, Psychological General Wellbeing Index (PGWBI), PRIME-MD, Patient Health Questionnaire-9 (PHQ-9), HRQoL, State Anxiety Scale, Zung Anxiety Scale, a questionnaire designed specifically for the study, or not reported.

*Study characteristics*

Randomized controlled trials (RCTs)

Prenatal Depressive Symptoms: There were 21 RCTs (n=4,392 women), including 15 exercise-only interventions (1-14) and seven exercise + co-interventions (15-20). Of the seven exercise + co-interventions, three implemented a diet intervention (16-18), three studies provided educational information about diet, pelvic floor muscle training and pregnancy-related discomfort (6, 15, 20), two provided behavioural counselling or strategies (17, 19) and one included pelvic floor exercises in their intervention (6).

The exercise-only interventions included aerobic exercise (5, 12, 14), mixed training (1, 6, 10, 11) and the rest utilized non-aerobic (yoga) interventions (2-4, 6-9, 13, 15-21). Six trials included women with depression (2-4, 7, 8, 21) and 7 trials included women without depression (1, 5, 9-12, 14). The two RCTs not included in the meta-analysis included women with unspecified depression status (6, 22). One trial included women who were previously inactive (14) and 14 included women whose previous physical activity levels were unspecified (1-12, 21, 22), 14 included women with various BMI (2-12, 14, 21, 22) and one included only women with overweight/obesity pre-pregnancy (1). Fourteen trials involved exercise that was supervised (1-12, 21, 22) and one trial that was unsupervised (14). The frequency of the interventions ranged from 1-7 days per week, low to high intensity of exercsie for 20-90 minutes.

Prenatal Depression: There were eight RCTs (n=2,481 women), including five exercise only interventions (1, 5, 10, 11, 23) and three exercise + co-interventions (16-18). All three exercise + co-interventions included a diet intervention (16-18) and one also included behavioural counselling (17). The exercise-only interventions included aerobic exercise (5 , 23) or mixed training (1, 10, 11). The frequency of the interventions ranged from 3-7 days per week, low to high intensity of exercsie for 20-60 minutes.

- Postpartum Depressive Symptoms: There were 7 RCTs (n = 2,785 women) including 4 exercise-only interventions (21, 24-26) and 3 exercise + co-interventions (16, 17, 19). Of the 3 exercise + co-interventions two included diet interventions (16, 17) and two included behavioural counselling (17, 19). The exercise-only interventions included mixed training (26) and yoga or stretching/breathing exercises (21, 24, 25). The frequency of the interventions ranged from 1-7 days per week, low to moderate intensity of exercise for 20-60 minutes.

- Postpartum Depression: There were 4 RCTs (n=2,536 women) including 2 exercise-only interventions (24, 26) and 2 exercise + co-interventions (16, 17). Of the exercise + co-interventions, one included diet (16) and one educational information about gestational weight gain, physical activity and diet (17). The exercise-only interventions included mixed training (26) or stretching/breathing (24) The frequency of the interventions ranged from 3 days per week, low to moderate intensity of exercsie for 20-45 minutes.

- Prenatal State Anxiety Symptoms: There were 8 RCTs (n=1,785 women) including 6 exercise-only interventions (2-4, 9, 13, 21) (one of which could not be included in the meta-analysis (13)) and 2 exercise + co-interventions (16, 20). Of the 2 exercise + co-interventions, one included a diet intervention (16) and the other included educational information about mindfulness (20). The frequency of the interventions ranged from 1-7 days per week, low to moderate intensity of exercsie for 20-90 minutes.

All exercise-only interventions included non-aerobic exercise (Tai Chi, Yoga) (2-4, 9, 13, 21). Four trials included women with anxiety (2-4, 21) and one included women without anxiety (9).

-Prenatal State Anxiety: There were 2 RCTs (n=1,534 women) that were exercise + co-interventions (16, 27). One included a diet intervention (16) and the other included educational information about reducing back pain, labour and delivery (27). The exercise component of the exercise+co-interventions included aerobic exercise (27) and mixed training (more than one type of exercise was prescribed) (16). The frequency of the interventions ranged from ‘most’-7 days per week of exercsie of 30min per bout to 210+ minutes per week.

-Prenatal Trait Anxiety Symptoms: There were 3 exercise-only RCTs (n=186 women) (2, 9, 13). All 3 interventions were non-aerobic (yoga) and also included supervised exercise sessions. The frequency of the interventions ranged from 1-7 days per week of exercsie for 60-90 minutes

-Prenatal Trait Anxiety: There was one exercise + co-intervention RCT (n=161 women) that included aerobic exercise training and educational information about reducing back pain, labour and delivery (27). The frequency of the intervention was 7 days per week, moderate intensity of exercsie for 210+ minutes per week.

-Postpartum State Anxiety Symptoms: There were 2 RCTs (n=1,299 women) including one exercise-only intervention (21) and one exercise + co-intervention (exercise+diet) (16). The exercise interventions included mixed training (16) and yoga (21). The frequency of the interventions ranged from one to ‘most’ days per week, low to moderate intensity of exercsie for 20-30 minutes.

-Post Partum State Anxiety: There was one exercise + co-intervention (mixed training+diet) RCT (n=153 women) (16). The frequency of the interventions was ‘most’ days per week, low to moderate intensity of exercsie for 30 minutes.

Non-Randomized Interventions

- Prenatal Depressive Symptoms: There was 4 non-randomized exercise-only intervention (n=420) (28-30). Three included women of various BMI (REF) and one trial included women with overweight/obesity pre-pregnancy (31). Three trials involved exercise that was supervised (28-30) and one involved exercise that was unsupervised (31). The exercise-only interventions included aerobic exercise (28, 30), yoga (29) and one study did not report mode of exercise (31). The frequency of the interventions ranged from 2-3 days per week, low to high intensity of exercsie for 30-60 minutes.

- Prenatal Depression: There was one non-randomized exercise-only intervention (n=100 women) that included supervised, aerobic training sessions (28). The frequency of the intervention was 3 days per week, moderate to high intensity of exercsie for 60 minutes.

- Postnatal Depressive Symptoms: There were 3 non-randomized exercise-only interventions (n=286 women) including one that included women of various BMI (defined as ‘general population’) (29) and one that included women with overweight or obesity (31). One study reported on the relationship between prenatal exercise and postnatal depressive symptoms but could not be included in the meta-analysis (32). This non-randomized intervention with “very low” quality evidence demonstrated a 10 week yoga intervention had a clinically meaningful decrease in depression severity of 4.4 (1.4) on Quick Inventory of Depressive Symptomatology and 5.5 (1.0) on the Edinburgh Postnatal Depression Scale (32). Using regression analysis, a dose-response relationship was observed where the more time spent practicing yoga, the greater reduction in depressive symptoms in a given week (32). This non-randomized intervention included women with unspecified BMI (32). The exercise interventions included yoga (29, 32) and one study did not report the mode of exercise (31). The frequency of the interventions ranged from 1-2 days per week of exercsie for 50-75 minutes.

- Prenatal State and Trait Anxiety Symptoms: There was one non-randomized exercise-only intervention (n=16 women) that could not be included in the meta-analysis. “very low” quality data suggested state anxiety was not reduced with the 7-week yoga intervention (33). The frequency and intensity of the intervention was not reported, each session lasted 75 minutes.

-Prenatal Trait Anxiety Symptoms: There was “very low” quality evidence from two non-randomized interventions (n=71 women) (33, 34). One non-randomized intervention that could not be included in the meta-analysis suggested 7 weeks of a mindful-based yoga intervention reduced trait anxiety when the intervention was introduced in the third, but not second trimester (33). The exercise interventions included resistance and pelvic floor training (34) or yoga (33). The frequency of the interventions ranged from 3 days per week, low to moderate intensity of exercsie for 30-75 minutes.

Observational studies

- Prenatal Depressive Symptoms: There were 8 cohort studies (n=5,324 women) with “very low” quality data, 5 of which could not be included in the meta-analysis. Three demonstrated a favourable effect of prenatal exercise on depressive symptoms. A cohort study of 3,482 women demonstrated a reduction in depressive symptoms during pregnancy at 32 weeks in women who exercised 1-2 times per week between 17-21 weeks gestation compared to women who did not exercise (OR 0.66, 95%CI 0.49, 0.91 after adjusting for maternal age, parity, education, marital status, smoking and pre-pregnancy BMI (35)). These data were supported by the PIN3 cohort study which suggested that women with <2.67 hours per week of MVPA had a reduced risk of high depressive symptoms compared to women with no MVPA (OR 0.56, 95%CI 0.38, 0.83, adjusted for depressive symptoms prior to 20 weeks (36)). No relationship was identified between exercise and depressive symptoms with >2.67 hours per week of MVPA. Another study suggested that a greater proportion of women with lower levels of depressive symptoms engaged in prenatal exercise (65.9%) than women with higher levels of depressive symptoms (51.8%; (37)). Downs 2008 identified that first trimester depressive symptoms were associated with first trimester exercise (Pearson correlation -0.20, p<0.01) but not for the second or third trimester (n=230) (38). One study had null association between depression scores and physical activity status [F(2,43)=1.89, p=0.164, (39)).

There were two case control studies (n=394 women) (40, 41), one of which could not be included in the meta-analysis (41). This case-control suggested that meeting the recommendations for weekly physical activity is weakly correlation with depression; however, the odds ratio was not significant (OR 1.94; 95%CI 0.83, 4.56 adjusted for age, parity, education and pre-pregnancy body mass index (41)). There were 4 cross-sectional studies (42-45) , three of which could not be included in the meta-analysis which demonstrated an inverse association between physical activity and prenatal depressive symptoms ((42, 44, 45); see Table 1 for details).

The exercise interventions included aerobic exercise (44), yoga (43, 46) while others did not specify the mode of exercise (35-42, 45, 47, 48). The frequency of the interventions ranged from 2-4+ days per week, low to high intensity of exercsie for 30-90 minutes.

- Prenatal Depression: There was one cohort study (n=180 women) (47) and one cross sectional study (n=402 women) (that could not be included in the meta-analysis) with “very low” quality evidence reported on the relationship between prenatal exercise and prenatal depression (49). A favourable effect was observed where women who exercised at least 20 minute per day during pregnancy were less likely to experience prenatal depression (using the Edinburgh Postnatal Depression Scale) than women who exercise occasionally (OR2.23, 95%CI 1.26, 3.92) or did not exercise during pregnancy (OR3.18, 95%CI 1.47, 6.87; see Table 1 for details) (49). The exercise interventions did not specify mode of exercise.

The frequency of the interventions ranged from 3-7 days per week, moderate intensity of exercsie for 20-30 minutes.

- Postnatal Depressive Symptoms: There was one cohort study (n=34 women) (46) and one cross sectional study (n=1,169 women) (North Carolina Pregnancy Risk Assessment Monitoring System 2004-2005) that found no significant association between third trimester exercise and postnatal depressive symptoms (50); women who were physically active both before pregnancy and during the third trimester of pregnancy had a reduction in severity of depressive symptoms (OR 0.66, 95%CI 0.49, 0.87; after controlling for age and marital status;(50)). The exercise interventions included yoga (46) or did not specify mode of exercise (50). The frequency of the interventions ranged from 1+ days per week, low to high intensity of exercsie for up to 90 minutes.

- Postpartum Depression: There was one cohort study (n=1,305 women), additional information from this study could not be included in the meta-analysis (51). Data from the Danish National Birth Cohort suggested women had a decreased risk of postpartum depression prescription if they were vigorously active (OR 0.81, 95%CI 0.66, 0.99), exercising 2-3 hours per week (OR 0.75, 95% CI 0.58-0.98) or achieving 8-15 MET h/week (OR 0.79, 95%CI 0.63, 0.99) (51). All ORs were adjusted for maternal age, parity, pre-pregnancy BMI, alcohol intake, smoking, occupation, education, home ownership, marital status, social support and history of previous depression.

There was one case-control study (n=57 women) that could not be included in the meta-analysis with “very low” quality evidence examining factors associated with resolution of depression following delivery. This study suggested higher prenatal exercise frequency in women who were likely to be depressed during pregnancy (Beck Depression Index, BDI-II >10) predicted postpartum recovery of depression (OR 1.23, 95%CI 0.08, 0.92) (52).

There was one cross-sectional study (n= 6,330 women) excluded from the meta-analysis that suggested women who did not exercise during the third trimester of pregnancy were more likely to experience postpartum depression than women who exercised 5 or more days per week (OR1.36, 95%CI 1.15, 1.62) (53). Exercising 1-4 times per week had no observable effect on postpartum depression (OR1.10, 95%CI 0.93, 1.32) (53).

The exercise interventions did not specify modes of exercise (51-53). The frequency of the interventions reached up to 7 days per week, low to high intensity of exercsie for up to 30+ minutes.

- Prenatal State Anxiety: There was one cohort study (n=180 women) (47) and one cross sectional study (n=203 women) (43). The frequency of the exercise interventions ranged from 2-3 days per week, low to moderate intensity of exercsie for 30-60 minutes (16, 27).

- Prenatal Trait Anxiety Symptoms: There was one cross-sectional study (n=203 women) (43) and one case control (n=56 women) (40). The frequency of the interventions ranged from 2-4+ days per week, low to high intensity of exercsie for 30-60 minutes.

*Information from Authors*

When data was presented in graphical form or additional clarification was required, authors were contracted for more information. The following information was obtained directly from individual authors, all other requests for information were not returned. Taniguchi (2016) provided the mean and standard deviation for the control and walking groups pre- and post-intervention for depression scores (14). Phelan et al provided unadjusted percentages of women with an EPDS cutoff of 13 or higher in the control versus intervention groups at 30 weeks gestation, 6 weeks and 6 months postpartum (17). Newham et al provided the mean and standard deviations for prenatal depression (EPDS) and anxiety (STAI) for the control and intervention groups (9). Gustafsson et al

Perales et al provided prenatal depression scores (CES-D) for the exercise and control groups (54). Guelfi et al provided the mean and standard deviations for prenatal depression (EPDS) (5). Field et al provided the sample size for post-intervention scores (4).

| **Supplementary table 1:** Study Characteristics | | | | | | | | | | | | | |
| --- | --- | --- | --- | --- | --- | --- | --- | --- | --- | --- | --- | --- | --- |
| **Author, Year, County, Study Design** | **Sample Size (n)** | **Age (yrs.)** | **Complications and Pre PA Level** | **PA Assessment Used** | **Notes Regarding PA Assessment** | **Definition of PA Groups** | **PA Prescription** | | | | | **Results** | **Co-Intervention** |
| **F** | **I** | **T** | **T** | **Compliance** |
| Battle et al., 2015, USA, Non RCT intervention | N=34 | 28 + 5.4 | Depressed women; QIDS between 7-20 | Objective, LTPA | Exercise intervention starting between 12-26 weeks gestation. | Yoga classes 2/week, for 10 weeks: an opening greeting; pranayama, breath awareness or meditation; a warm-up that included gentle, breath-linked movement; standing poses; floor poses; a final resting pose; pranayama or meditation | 1-2/wk | NR | 75mins/class | Yoga | Twenty-nine participants attended one or more classes; five did not attend any classes. The mean number of classes attended for those who attended classes was 5.2 | Data in forest plot | None |
| Beddoe et al 2009, USA, non-RCT intervention | N=16 | 30.4 | None | Objective, LTPA | Mindfulness-based yoga group intervention starting between 12 and 32 weeks gestation. | Supervised mindfulness-based yoga classes. | NR | NR | 75mins/class | Yoga | NR | Data in forest plot | None |
| Bershadsky,2014, USA, Cohort | Yoga: 38 No Yoga/Control: 13 | >18 | None | Self-reported, LTPA | Exercise group recruited from yoga studios | Yoga group: Women recruited from 2 yoga studios: "90-min sessions of prenatal Hatha yoga, a type of yoga emphasizing physical, mental and breathing techniques to condition the body, focus the mind, and connect the body and mind. 60 min of asanas (i.e., body postures), 10 min of stretching, and 5-10 min of savasana (i.e., final relaxation), with pranayama (i.e., breathing) instruction throughout the practice." No yoga: "Women who did not practice yoga or other relaxation techniques during pregnancy (control group) were recruited from an ongoing unrelated study of perinatal depression (data unpublished) via obstetrician referrals and community advertisements | NR | NR | NR | NR | NR | Data in forest plot | None |
| Bowen et al., 2009, Canada, Cross-sectional | N=402 | 22.8 + 5.2 | Women attending two outreach programs for socially high risk pregnant women, mostly Aboriginal women | Self-reported, Total PA |  | Active: At least 20 min each day Inactive: Less than 20 min each day | 7/wk | NR | A: 20+ minutes I: <20 minutes | VPA | NR | Crude: exercised occasionally - OR 2.23 (95% CI = 1.26- 3.92)  never exercised - OR 3.18 (95% CI = 1.47- 6.87) | None |
| Choi et al., 2016, USA, RCT | E: 15 C: 15 | E: 32.9(2.54) C: 34.5(2.5) | previously sedentary | Self-reported, Total PA | 12-week smart phone app intervention | control group were also advised in the initial baseline meeting to increase steps/day to 8500 but this was not followed up/assessed | 7/wk | >8500 steps/day | NR | Walk | E: response rates for daily messages and activity diary 5 days per week; 76% in first week, 60% in weeks thereafter. | Data in forest plot |  |
| Claesson, 2014, Sweden, Cohort | Inactive: 79 Active: 74 | E: 29.7 + 4.43 C: 29.6 + 4.58 | Obese women (BMI= 30 kg/m2) | Self-reported, LTPA |  | Active: Habitual physical activity performed with at least moderate intensity three times weekly or more during at least 15 weeks of pregnancy. Inactive: did not perform moderate intensity PA three times weekly or more during at least 15 weeks of pregnancy. |  |  |  |  | NR | Data in forest plot | None |
| Cutinho et al., 2016, India, RCT | E: 80 C: 80 | 24 |  | Objective, LTPA | Unsupervised yoga starting at 14 weeks gestation (six sessions were supervised but had daily yoga at home). | A six sessions of yoga practice was given to the women from 14 weeks of gestation and they practiced yoga daily at home until delivery. The compliance of the yoga practice was monitored by diary and phone calls. The yoga program was validated by the experts. The women in the control group received the regular care and treatment. The yoga program designed for the antenatal women consisted of asanas, pranayama, meditation and yoga nidra. | 7/wk | NR | NR | Yoga | NR | Data in forest plot | None |
| Da Costa et al., 2003, Canada, Cohort | Exercisers: 38 Non Exercisers: 142 | 29.09 + 4.25 |  | Self-reported, LTPA |  | Exercisers: "reported engaging in LTPA (i.e., swimming, brisk walking) requiring at least moderate energy expenditure (three or more metabolic equivalents) in that trimester." For the group of women engaging in LTPA during pregnancy, the rate of regular physical activity (three or more sessions per week for at least 30 min) was 54.7% (n = 29) in the first trimester, 41.5% (n = 22) in the second trimester and 39.5% (n = 15)in the third trimester. Non-Exercisers: Reported no exercise during the prenatal period | 3+/wk | NR | NR | VPA | NR | Data in forest plot | None |
| Davis et al., 2015, USA, RCT | E: 23 C: 23 | E: 29.74(5.4) C: 30.57(4.46) | Elevated risk for depression and/or anxiety. | Self-reported, Total PA | Supervised yoga | 8 weeks of prenatal yoga (8 weekly classes) | 1/wk | NR | 75 mins/class | yoga | 86.96 the women attended a mean of 6/8 yoga sessions | Data in forest plot | None |
| de Wit et al., 2015, Austria, Belgium, Ireland, Italy, Poland, Spain and the Netherlands, cross-sectional | N=98 | 31.6 + 5.8 | None | Objective, Total PA | Actigraph GT3X, GT1M or Actitrainer accelerometer | Using the Freedson cut-off points, the number of minutes per day in light (100–1951 counts/min), moderate (1952–5724 counts/min) and vigorous (>5724 counts/min) activity were calculated as well as time spent sedentary (<100 counts/min). For analysis, the time spent in moderate-to-vigorous activity (MVPA) minutes per day) and in sedentary behaviour (as proportion of total wear time) were used. | 7/wk | MVPA | NR | VPA | NR | Women with good well-being spent 85 % more time in MVPA compared to women with a depressed mood (P = 0.03) (a score of 50 or over on the WHO-5 was used as an indicator of depressed mood; a score of under 50 was used as an indicator of good well-being. | None |
| Demissie et al., 2011, USA, Cohort | N=1077 | >16 | None | Self-reported, Total PA | accelerometer was also used | Total MVPA (hours/week) - n (%) 0 – 356 (33.1)  ≤2.67 – 370 (34.4) >2.67 – 351 (32.6)  Recreational MVPA (hours/week) – n (%)  0 – 598 (55.5) ≤2 – 271 (25.2) >2 – 208 (19.3) | NR | MVPA | NR | VPA | NR | Odds Ratio (Crude): Total MVPA (hours/week):  0: 0R 1.00 (REF) <=2.67: OR= 0.52 (95% CI = 0.37, 0.73) >2.67: 0.63 (95% CI= 0.45, 0.88) Total MVPA (MET-hours/week):  0: 0R 1.00 (REF) <= 9: or= 0.76 (95% CI = 0.48, 1.19) >9: 1.14 (95% CI= 0.80, 1.63)  Odds Ratio (Adjusted): Total MVPA (hours/week):  0: 0R 1.00 (REF) <=2.67: OR= 0.56 (95% CI = 0.38, 0.83) >2.67: 0.73 (95% CI= 0.50, 1.07) Total MVPA (MET-hours/week):  0: 0R 1.00 (REF) <= 9: or= 0.71 (95% CI = 0.42, 1.18) >9: 0,69 (95% CI= 0.46, 1.06) Adjusted for depressive symptoms at <20 weeks’ gestation, education | None |
| Dodd et al., 2016, Australia, RCT | E: 1108 (DVD: 543; no DVD: 565) C: 1104 | E: 29.3 + 5.4 C: 29.6 + 5.6 | BMI >25kg/m2 | Self-reported, LTPA | Counselling intervention starting between 10-20 weeks gestation | Women randomized to receive Lifestyle Advice participated in a comprehensive dietary and lifestyle intervention over the course of their pregnancy, which included a combination of dietary, physical activity and behavioural strategies, delivered by a research dietician and trained research assistants. Physical activity advice focused on the benefits of exercise in pregnancy, potential safety concerns relating to exercise during pregnancy, tips to increase incidental activity and walking, and promoting recreational, aerobic and strength-conditioning exercises that are appropriate during pregnancy | Most days/wk | Low to Mod | 30 mins | VPA | NR | Data in forest plot | Diet |
| Downs et al., 2008, USA, Cohort | Somewhat active pre-pregnancy exercise group: 113 Active pre-pregnancy exercise group: 96 | 30.05 + 4.13 |  | Self-reported, LTPA |  | Women reporting 120 min or more of weekly activity (i.e., 30 min of activity on at least 4 days per week) in pre-pregnancy were classified as “active” (N=96), women reporting less than 120 and greater than 30 min of activity (i.e., 30 min of activity on at least 1 day per week) were classified as “somewhat active” (N=113), and women reporting no minute of activity time were classified as “not active” (N=11). Due to insufficient data in the not active group, the analyses to examine the moderating influence of prepregnancy activity were conducted only on the active and somewhat active groups. | 1+/wk | NR | active: 120+ minutes/week somewhat active: 30-120 minutes/week | VPA | NR | First trimester depressive symptoms were associated with first trimester exercise (Pearson correlation -0.20, p<0.01) but not for the second or third trimester. | None |
| El-Rafie et al., 2016, Egypt, Non RCT | Exercise: 50 Control: 50 | E: 26.7 + 2.3 C: 28.4 + 2.6 |  | Objective, LTPA |  | The exercise group regularly attended supervised sessions for 12 weeks. The activities in each session included walking, aerobic exercise, stretching, and relaxation. The control group completed their usual antenatal care. In addition to normal prenatal care, the experimental group regularly attended supervised exercise sessions for 12 weeks (three 60-minute exercise classes per week), commencing at 16–27 weeks of gestation. Each session includes warm-up (10 minutes); aerobic exercise (30 minutes) such as step aerobics (low-step level), stationary bicycling, or treadmill walking; stretching (10 minutes) such as Kegel exercises, pelvic curl, tailor press, back bridge, and crunches; and relaxation (10 minute) such as bending to relieve backache, arm reaches, and shoulder circles. Aerobic activities were prescribed at moderate-to-vigorous intensity. | 3/wk | MVPA | 60 mins | Walk, VPA, stretch, relax | Attended at least 29 of 36 sessions to be included in the analysis | Data in forest plot | None |
| Ersek et al., 2009, USA, Cross-sectional | N=2169 | 18-45 |  | Self-reported, LTPA |  | Inactive: “Women who answered less than 1 day per week or I was told by a doctor, nurse, or other health care worker not to exercise were categorized as ‘‘no.’’" Active: "Women who answered that they were physically active at least 1 day per week were categorized as ‘‘yes.’’" | 1+/wk | NR | NR | VPA | NR | Crude: "In the unadjusted models, participants who engaged in physical activity before pregnancy had reduced odds of feeling depressed or ‘‘down’’ (OR= 0.72, 95% CI= 0.58, 0.90) and had reduced odds of having little interest or pleasure (OR= 0.62, 95% CI= 0.50, 0.77) compared with women who were not physically active." "There were no significant associations between physical activity during the third trimester and depressive symptoms." "Participants who were physically active both pre-pregnancy and during the third trimester had 0.63 times the odds of having little interest or pleasure compared with women who were not physically active in the unadjusted model and this association was statistically significant (95% CI= 0.48, 0.82).  Odds Ratio Adjusted:  "When controlling for age and marital status, these associations were slightly attenuated (OR= 0.80, 95% CI=0.63,1.02 and OR= 0.67, 95% CI= 0.53, 0.86, respectively), and remained statistically significant only for the association between physical activity before pregnancy and having little interest or pleasure." "There were no significant associations between physical activity during the third trimester and depressive symptoms." | None |
| Field et al., 2012, USA, RCT | E: 28 C: 28 | All participants: 26.6 | Depressed at baseline. | Objective, LTPA | Supervised yoga from 20-32 weeks gestation. | The yoga and massage sessions began after group assignment at approximately 20 weeks gestation and continued for 12 weeks until 32 weeks gestation when the second assessment was made. For the yoga sessions, a trained yoga instructor provided a 20-min yoga routine that was designed especially for second and third trimester pregnant women with consultation from our OB/GYN collaborator | NR | NR | 20 mins | Yoga | 82% | Data in forest plot | None |
| Field et al., 2013, USA, RCT | E: 46 C: 46 | E: 24.4 + 4.7 C: 24.5 + 5.0 | All women had depression as diagnosed with the Structured Clinical Interview for Depression. | Objective, LTPA | Supervised yoga intervention starting at 22-34 weeks gestation. | The women in the yoga group participated in 20-min sessions once per week for 12 weeks. A trained yoga instructor led group participants through a routine that was specifically designed for women in their second and third trimester of pregnancy. This routine was outlined in a manual and videotaped for DVD demonstrations for the instructor and for the pregnant women. This routine included only basic sitting, kneeling and standing yoga poses as follows: spinal twist, table pose, cat/cow, kneeling balance, kneeling warrior, runner’s stretch, stork pose, tree pose, eagle pose, warrior 1, warrior 2, reverse warrior, side-angle pose, triangle pose, sitting angular pose, cow’s head pose, butterflies and prayer position. | 1/wk | NR | 20 mins | Yoga | NR | Data in forest plot | None |
| Gaston et al., 2013, Canada, Case control | E: 17 C: 39 | 30.34 + 4.57 |  | Objective, LTPA | accelerometer | Active= meeting recommendations (>/= to 4 bouts/week) The main variable of interest was 30-min bouts of moderate-vigorous physical activity (MVPA). A maximum of five observations falling below the cut-point were allowed (i.e. 25 out of 30min had to be above the cut- point; Colley et al., 2011).  Inactive = not meeting recommendation (< 4 bouts/week) The main variable of interest was 30-min bouts of moderate-vigorous physical activity (MVPA). A maximum of five observations falling below the cut-point were allowed (i.e. 25 out of 30min had to be above the cut- point; Colley et al., 2011). | 4+/wk | MVPA | 30+mins | VPA | NR | Data in forest plot | None |
| Gjestland et al., 2013, Norway, Cohort | exercise <1x/week: 835 exercise 1-2x/week: 1178 exercise >=3x/week: 740 | 31.1 + 4.8 |  | Self-reported, Total PA |  | The three questions asked concerning frequency, intensity and duration of exercise were as follows: 1) After conception, how often do you engage in exercise (e.g., brisk walking, skiing, commuting to work by bike, sports/exercise) (never, <once a week, once a week, twice a week, three times a week, ≥3 times a week); 2) If you engage in exercise, how strenuously do you exercise? (no sweating and normal breathing, modest sweating and light breathing, sweating and breathing heavily) 3) If you engage in exercise, for how long do you exercise? (10 minutes, 11-20 minutes, 21-60 minutes, >60 minutes). Additionally, we categorized exercise by frequency of exercise into three groups: <once a week (never + <once a week), 1-2 times a week, and ≥3 times a week. | <1/wk;1-2/wk ;>3/wk | no sweating and normal breathing; sweating and increased breathing; sweating and breathing heavily | 10 minutes; 11-20 minutes; 21-60 minutes; 60+ minutes | VPA | NR | Crude: exercise 1-2x/week: OR= 0.59 (0.43-0.81) exercise >=3x/week: 0R= 0.79 (0.56, 1.11)  Adjusted: Adjusted for maternal age, parity, education, marital status, smoking, pre-pregnancy BMI exercise 1-2x/week: 0.66(0.49-0.91) exercise >=3x/week: 0.90(0.64-1.28) | None |
| Goodwin, 2000, Australia, Cohort | Exercisers: 25 Non Exercisers: 18 | E: 31.68 + 3.33 C: 29.0 + 3.31 |  | Self-report, Total PA | Exercisers: 203 mins/week on average Non Exercisers: 11.8 mins/week on average | Exercisers (n=25): frequency: >3/week; duration: >30mins/session; duration for week: >90 minutes/week; Intensity of 60% HRM  Non-Exercisers (n=18): frequency: <1; duration for week: <40 minutes/week; Intensity of <50% HRM  "Analysis of exercise history for the previous 4 weeks determined group allocation." Exercisers (n=25): frequency: >3/week; duration: >30mins/session; duration for week: >90 minutes/week; Intensity of 60% HRM  Non-Exercisers (n=18): frequency: <1; duration for week: <40 minutes/week; Intensity of <50% HRM  "Analysis of exercise history for the previous 4 weeks determined group allocation." | NR | NR | NR | NR | NR | Data in forest plot | None |
| Guelfi et al., 2016, Australia, RCT | E: 85  C: 87 | E: 33.6 + 4.1 C: 33.8 + 3.9 | History of GDM | Objective, LTPA | Supervised intervention starting prior to 14 weeks gestation. | Intervention: Exercise intervention (14-week supervised home-based stationary cycling program) or to a control group (standard care) at 13+/-1 weeks of gestation. Each session commenced with a 5-minute warm-up consisting of pedaling at an intensity that equated to 55–65% of age-predicted maximum heart rate and a rating of perceived exertion of 9–11 on the Borg scale.12 This scale ranges from 6 (no exertion) to 20 (where exercise is perceived to be “very very hard”). The subsequent conditioning period was divided into 5-minute periods of continuous moderate-intensity cycling (65–75% maximum heart rate; rating of perceived exertion 12–13) alternating with 5-minute periods of interval cycling. Two types of intervals were used; one involved an increase in pedaling rate for 15 seconds and the other involved an increase in cycling resistance for 30 seconds (target intensity 75–85% maximum heart rate; rating of perceived exertion 14–16) repeated every 2 minutes. A 5-minute cool down concluded each session (55–65% maximum heart rate; rating of perceived exertion 9–11) followed by light stretching. The duration of each session was progressively increased by 5-minute increments every 2–3 weeks, as tolerated, from 20 to 30 minutes to a maximum session duration of 60 minutes. The degree of progression was dependent on the baseline fitness level of the woman and her ongoing pregnancy symptoms. | 3/wk | 55-85% HR max BORG: 9-16 | 20-60/mins | Bicycle | Compliance to the exercise intervention was high (median 86% of sessions completed; IQR 79-95%) | Data in forest plot | None |
| Guida et al., 2012, USA, Cross Sectional | N=6330 | NR |  | Self-reported, Total PA |  | Physical activity was measured by the question, “During the last 3 months of your most recent pregnancy, how often did you participate in any physical activity or exercise for 30 minutes or more?” with a response set of “less than one day per week, one to four days per week, and five or more days per week”. Antenatal sedentary behavior refers to participants who engaged in less than one day of physical activity per week. | <1day/week 1-4 days/week >5days/week | NR | 30+/mins | Various PA | NR | Crude: Odds Ratio (OR) = 1.36, 95% Confidence Interval (95% CI): 1.15, 1.62, p-value < 0.0005 | None |

| Gustafsson et al., 2015, Norway, RCT | E: 429 C: 426 | E: 30.5 (4.4) C: 30.4 (4.3) | None | Objective, LTPA | 12 week exercise program from 20-36 weeks gestation. | Exercise: weekly supervised group exercise session including aerobic and strength training plus two sessions of exercise at home. | 3/wk | 13-14 on BORG scale | 60 min | Aerobic and resistance | E: 55% of women followed recommended exercise protocol. C: 10% in control group exercised 3 days per week or more at moderate to high intensity at follow-up. | Data in forest plot | Written information on diet, pelvic floor exercise. |
| --- | --- | --- | --- | --- | --- | --- | --- | --- | --- | --- | --- | --- | --- |
| Guszkowska et al., 2011, Poland, non-RCT Intervention | E: 135 C: 64 | E: 28.05(3.484) C: 25.89(3.542) |  | Self-report, LTPA |  | As regards the subgroup of women exercising during pregnancy (n=135), the inclusion criterion was attending a physical fitness program for pregnant women, at least two days a week. Their participation in the exercise program had been approved by their obstetrician-gynecologist. The program lasted 12 weeks (two sessions per week) and included Pilates, yoga and body ball exercises. During each 60-minute session the participants performed to music in a friendly atmosphere strengthening, stretching, relaxing and slightly stimulating exercises, supplemented by those preparing for childbirth. The non-exercising subgroup (n=64) consisted of those who neither attended any physical fitness class for pregnant women, nor exercised at home during pregnancy. The inclusion criterion was negative answering to the following questions: a. Have you participated in any program of exercise for pregnant women in course of pregnancy? b. Have you performed any physical exercise individually being pregnant? | 2/wk | NR | 60 mins | Yoga, Stretch, Body Ball, Relax | NR | Data in forest plot | None |
| Guszkowska et al., 2015, Poland, Non RCT Intervention | exercise: 62 childbirth classes: 47 | E: 29.16 + 3.53 C: 28.89 + 3.53 |  | Objective, LTPA |  | Exercise group: "physical exercise classes from the Active Nine Months program for pregnant women. They trained twice a week, 50 minutes each time, and were trained by experienced fitness instructors. The program was comprised of general developmental exercises including elements of Pilates, yoga and body ball, muscle strength and elasticity exercises, joint mobility exercises, and relaxation and breathing exercises. Classes were conducted for 8 weeks."  Childbirth classes: "The program of such classes focused on learning about pregnancy, labor, and the period of puerperium and child development in the infancy period, as well as on developing skills for proper reactions during labor and the care of a newborn. Class duration, which varied depending on the subject, fluctuated between 45 and 60 minutes. These classes were conducted by midwives in cooperation with gynecologists, pediatricians, and psychologists. Classes were conducted for 6 weeks." | 2/wk | NR | 50 mins | Pilates, yoga, muscle strength, joint mobility | only women who attended 75% of exercise classes were included in the analyses | Data in forest plot | None |
| Haakstad et al., 2016, Norway, RCT | E: 52 C: 53 | E: 31.2 + 3.7  C: 30.3 + 4.4 | Pre-pregnancy exercise levels did not include participation in a structured exercise programme >60 min once per week or brisk walking >120 min per week for the past 6 months. | Objective, LTPA |  | 12-week exercise programme including 60 min of supervised aerobic dance performed at least twice a week. Each started with five min warm-up, followed by 35 min of aerobic dance, including cool-down. This was followed by 15 min of strength-training with a special focus on the deep abdominal stabilization muscles, pelvic floor, and back muscles. The last five min were devoted to stretching, relaxation and body awareness exercises. The aerobic dance routine included low-impact exercises and step-training. Control group maintained usual activity levels | 2+/wk | moderate  Borg: 12-14 | 60 mins | aerobic dance | 14/52 women had 100% adherence, 40% attended 80% or more of the recommended sessions, 60% participated in less than 80% of recommended sessions. 16 women (31%) adhering to a minimum of 15 moderately intense exercise 3 to 5 times a week; based on registrations done by aerobic instructors | Data in forest plot | None |
| Kalayeh et al., 2016, Iran, Non RCT | E: 35 C: 35 | E: 28.77(4.97) C: 28.88(4.08) |  | Objective, LTPA | Supervised aerobic exercise for 8 weeks. | 8-weeks exercise program, 3 sessions per week warm up: 5 minutes of upper and lower body exercises continuous aerobic exercise: 5 minutes first and then increasing by 1 minute to a total of 15 minutes cool down: 10-15 minutes including stretching; until HR <100bpm intensity: < 60 % of max HR total = 30-45 minutes 3x/week for 8 weeks | 3/wk | 60 % HR max Maternal HR 90-135 bpm | 30-45 mins | Walking, VPA | NR | Data in forest plot | None |
| Kolu, 2014, Finland, Case Control | Active: 80 Less Active: 258 | Meeting Recommendations: 29.4 + 0.51 Not Meeting Recommendations: 29.8 + 0.29 | Women had at least one risk factor for gestational diabetes mellitus (BMI over 25 kg/m2, GDM or a macrosomic newborn in any earlier pregnancy, any sign of glucose-intolerance, type 1 or 2 diabetes in first- or second-degree relatives, and age above 40 years). | Self-reported, Objective, LTPA, Total PA |  | A secondary analysis of a cluster randomized trial was performed. Active: 150 minutes of moderate to vigorous physical activity or more per week Less Active: Less than 150 minutes of moderate to vigorous physical activity per week | NR | NR | NR | NR | NR | Crude: 2.09 (95% CI= 0.90, 4.84)  Adjusted: 1.94 (0.83, 4.56) *Adjusted for age, parity, education, and pre-pregnancy body mass index | None |
| Loprinzi et al., 2012, USA, Cross-sectional | N=141 | 28.7 + 0.5 |  | Objective, Total PA | ActiGraph 7164 accelerometer | Objectively measured PA was correlated with depressive symptoms. Meeting physical activity guidelines if from the accelerometry data, participants engaged in at least 150 min of moderate-intensity activity, 75 min of vigorous-intensity activity, or some combination of the two | NR | MVPA | 75-150+ minutes/week | VPA | NR | Data in forest plot | None |
| Miquelutti et al., 2013, Brazil, RCT | E: 97  C: 100 | E: 22.9 + 4.6 C: 22.9 + 5.1 | E: 25.8% practiced physical activity prior to pregnancy C: 31% practiced physical activity prior to pregnancy | Self-reported, LTPA | Counselling intervention starting 18-24 weeks gestation. | Women in the exercise group were encouraged to do 30min of daily aerobic exercise, but they did not keep exercise logs to validate this. Attended a birth preparation program (50 minutes) on a monthly basis to 30 weeks, biweekly up to 36 weeks and weekly until delivery. Supervised sessions included PFMT and education. | 7/wk | Moderate | 210+ minutes/week | PFMT | NR | Data in forest plot | Education |
| Mitchell et al., 2012, USA, RCT | E: 12 C: 12 | 26.6(18-37) | Clinically depressed | Objective, LTPA | Supervised yoga from 20 - 32 weeks gestation. | 24 sessions prescribed (24 week intervention) | 1/wk | NR | 40 mins | Yoga | NR | Data in forest plot | None |
| Mohammadi et al., 2015, Iran, RCT | E: 43 C: 42 | E: 25.2(4.7) C: 25.3(5.2) | Not depressed, not currently participating in regular exercise programmes | Self-report, LTPA | Education intervention starting at 26-32 weeks gestation (1 - 40 min session). | The women were recommended to do the exercise three times a week (for 20–30 min each), until delivery, according to the educational antenatal CD at their home. The exercises were low-intensity stretching and breathing practices. For evaluation of the study adherence, the first author called the participants at the end of the study and gathered information on the approximate number of exercise sessions each group performed. | 3/wk | Light | 60-90 minutes/week 20-30 minutes/session | Stretching, breathing exercises | 42% of the women did < 10 exercise sessions, 36% between 10-20 exercise sessions and 24% >20 exercise session (out of a max of 30-40 exercise sessions) | Data in forest plot | None |
| Newham et al., 2014, UK, RCT | E: 31 C: 28 | E: 31(5) C: 31(7) | E: 7.1% had no activity before the intervention, 10.7% had a previous yoga experience C: 16.1% reported no previous physical activity | Objective, LTPA | Supervised | 8-week yoga program, once per week Participants in the treatment as usual group were not permitted to join this class but were allowed to make their own arrangements if so desired and their attendance at alternative yoga classes (or practice at home) was recorded. NOTE: Six of the women in the TAU group (21%) did not return the questionnaire pack number 2 at follow- up. | 1/wk | NR | 90 mins | Yoga | Participants attended 6 of 8 sessions. Two of the women in the yoga group (6%) withdrew from the 8-week program | Data in forest plot | None |
| Orr et al., 2006, USA, Cohort | N=922 | >18 | low-income, pregnant, Black women; Exercise participation before pregnancy; based on strenuous vs non-strenuous vs none; 234 women (25.5%) did not exercise before pregnancy; 330 women (35.9%) did not exercise during pregnancy; 402 women (43.8%) participated in nonstrenuous only before pregnancy; and 516 women (56.1%) during pregnancy; 74 women (8.1%) participated in strenuous only before pregnancy and 19 women (2.1%) during pregnancy; and 207 women (22.5%) participated in both non strenuous and strenuous before pregnancy and 55 women (6.0%) during pregnancy | Self-report, LTPA |  | Exercise participation was assessed separately before pregnancy and during pregnancy...Women were asked about their participation in strenuous (exercise which made them ‘‘breathe hard and sweat even when the weather is not hot’’) and non-strenuous activities (exercise that did not make them ‘‘breathe hard and sweat, even when the weather is not hot’’). Women were also asked if they participated in the activities for >20 minutes, three times per week." Participants were categorized into the following groups: Non- exercisers: did not engage in exercise before pregnancy  Participated only in strenuous activities  Participated only in non-strenuous activities  Participated in both strenuous and non-strenuous activities Activity levels were correlated with mental health outcomes. | 3/wk | Various | 20+ mins | strenuous and non-strenuous | NR | Data in forest plot | None |
| Perales et al., 2015, Spain, RCT, NCT01723098 | E: 120 C: 121 | C: 31 + 4 E: 31 + 4 |  |  | Supervised exercise starting at 8-11 weeks gestation until 38-39 weeks gestation. | Exercise Group: Aerobic: "Women performed three sessions per week (Monday–Wednesday–Friday), which had a total duration of 55–60 min and were supervised by a professional fitness instructor (8–10 women per session and instructor). [at the] "high end of moderate–intensity” (55%–60% of their HR reserve)."  Resistance & Balance Training: "engaged major muscles groups (upper/lower limb muscles, back, shoulders, abdominal muscles; strength exercises performed in upper and lower limbs, trunk and abdominal muscles, with the aim of improving general muscle strength and preventing common muscle imbalances during pregnancy (one set of 15 repetitions during the first trimester and two sets of 15 repetitions during the rest of the program). Participants also performed exercises aiming at improving balance, pelvis mobility, and body awareness, as well as pelvic floor muscle exercises for prevention of urinary incontinence." | 3/wk | Moderate | 55-60 mins | Aerobic, Resistance and balance training | Adherence to the training program averaged 90% ± 8%, with the totality of the subjects in the exercise group completing at least 80% of the planned sessions and 34% completing 100% of them. | Data in forest plot | None |
| Perales et al., 2015, Spain, RCT, NCT01753622 | E: 52 C: 54 | E: 31.98 + 3.74 C: 33.39 + 3.98 | Overweight-obese | Objective, LTPA | Supervised exercise starting at 8-11 weeks gestation until 38-39 weeks gestation. | The exercise program was performed three times per week. Each session lasted between 55 and 60 minutes. The structure was the same in all of the sessions; the women started with a warm-up that consisted of 5 minutes of walking at different intensities, static stretching of most muscle groups and joint mobility exercises. In the same manner, 5 – 10 minutes at the end of each session was spent on the cool-down, including relaxing exercise, static stretching and partner massages. The session finished with 10 minutes of pelvic floor muscle training to prevent urinary incontinence. | 3/wk | 55-60%HR max | 55-60 mins | Walking- not treadmill, PFMT, Resistance training, Aerobics | 80% of sessions: 3 women excluded for not reaching 80% of sessions | Data in forest plot | None |
| Perales et al., 2015, Spain, RCT, NCT 01696201 | E: 107 C: 93 | E: 31.57 + 3.87 C: 31.51 + 3.92 | Not depressed. Not highly active (<4x/week) | Objective, LTPA | Supervised exercise starting at 9-12 weeks gestation. | Supervised physical conditioning program that included three 55- to 60-minute sessions per week that began between 9 and 12 weeks of gestation and continued until the end of the third trimester (weeks 39-40). | 3/wk | 55-60% age-predicted %HR max; BORG: 12-13 | 55-60 mins | Walking- not treadmill, PFMT, Resistance training, Aerobics | Attendance: >95% | Data in forest plot | None |
| Petrovic et al., 2016, Serbia, Cross-Sectional | N=200 | 28.12 + 5.29 |  | Self-report, Total PA |  | Correlation between amount of time spent walking and Beck score examined. | 7/wk | NR | NR | Walk | NR | Data in forest plot | None |
| Phelan et al., 2014, USA, RCT | E: 201 C: 200 | E: 28.8 + 5.2 C: 28.6 + 5.2 |  | Objective, LTPA | Behavioural counselling intervention starting 10-16 weeks. | Intervention: The intervention included one face-to-face visit with an interventionist at the onset of treatment who discussed appropriate weight gains during pregnancy, physical activity (30 min of walking most days of the week), and calorie goals (20 kcal/kg); emphasis was placed on decreasing high fat foods, increasing physical activity, and daily self-monitoring of eating, exercise, and weight. Body-weight scales, food records, and pedometers were provided to promote adherence to daily self-monitoring. Automated postcards that prompted healthy eating and exercise habits were mailed weekly. In addition, after each clinic visit, women were sent personalized graphs of their weight gains with feedback. All women in the intervention received 3 brief (i.e., 10–15 min) supportive phone calls from the dietitian during the intervention. Women who were over or under weight gain guidelines during any 1-mo interval received additional brief, supportive phone calls (2 calls/mo) that provided structured meal plans, and specific goals until weight gains returned to appropriate amounts. (weeks gestation at study entry: C: 13.5 +/- 1.8; E: 13.6 +/- 1.8 -continued throughout pregnancy) | Most days | NR | 30 mins | Walk | 89% (320/358) of the women completed the 6-mo assessment and 79% (261/331) completed the 12-mo assessment. | Data in forest plot | Behavioural Counselling, Diet |
| Poston et al., 2013, UK, RCT | E: 94 C: 89 | E: 30.4 + 5.7 C: 30.7 + 4.9 | Obese | Self-reported, Total PA | Supervised intervention starting 15-18 weeks gestation. | The intervention, which was informed by control theory and elements of social cognitive theory, consisted of eight further health trainer-led group or individual sessions of 1 h duration once a week for 8 weeks. The intention of the intervention was to improve glucose tolerance through dietary and physical activity behaviour change. With the dietary intervention, we aimed to promote a healthy pattern of eating but not necessarily to restrict energy intake. We tailored recommendations to the woman’s habitual diet and cultural preference, and suggested exchanging carbohydrate-rich foods with a medium-to-high glycaemic index for those with a lower glycaemic index to reduce the glycaemic load, and restricting dietary intake of saturated fat. With respect to advice on physical activity, we focused on incremental increases in walking from a pedometer- assessed baseline, tailored to pre-existing activities. The emphasis of the exercise intervention was on walking at a moderate intensity, with additional options included, particularly for women already engaging in some physical activity.  Women who were allocated to the standard antenatal care group continued to attend routine antenatal appointments at their trial center, in accordance with local practice. | 7/wk | MVPA | 420min/week | Walk | On average, women who were assigned the intervention attended seven (SD 3) of eight health trainer-led sessions, including four in person, and a further three by telephone or email. For sessions attended in person, 30% of women attended only one session, and 46% attended fewer than four. For sessions delivered by any method, 10% of women received only one session and 17% had fewer than four.  Control: 15-18 weeks + 6 days 1386 (660-3052) met min/week 27-28 + 6days 1386 (639-3363)  Intervention: 15-18 weeks + 6 days 1386 (594-2982) met min/week 27-28 + 6days 1836 (792-4158) | Data in forest plot | Diet |
| Robledo-Colonia et al., 2012, Columbia, RCT | E: 40 C: 40 | E: 21(3) C: 21(3) |  | Objective, LTPA | supervised exercise from 16-20 weeks until 28-32 weeks. | Sessions consisted of walking (10 min), aerobic exercise (30 min), stretching (10 min), and relaxation (10 min). Aerobic activities were prescribed at moderate to vigorous intensity, aiming for 55–75% of maximal heart rate and adjusted according to ratings on the Borg scale | 3/wk | 55-75 % HR max | 180 minutes/week | Aerobics | Experimental group received 28.9 + 3.2/36 sessions. | Data in forest plot | None |
| Satyapriya et al., 2013, India, RCT | E: 51 C: 45 | E: 26.41 + 3.01 C: 24.96 + 2.58 |  | Objective, LTPA | Supervised starting 18-20 weeks gestation for the first month, then unsupervised at home. | Yoga group practiced integrated yoga and control group did standard antenatal exercises, one hour daily, from 20th to 36th week of gestation. Both groups learnt the practices (in batches of 4-10) from trained instructors in sessions of 2 h/day (3 days/week) for one month. Subsequently, they continued the practices at home using a prerecorded instruction cassette for one hour each day. Both groups had refresher classes of 2 h each time they came for their antenatal obstetric assessment. (Once in 3 weeks up to 28 weeks and every two weeks up to 36 weeks). | 7/wk | NR | 60 mins | Yoga or standard antenatal exercises | Compliance was documented by signed attendance at initial training and monitoring by phone and activity diaries thereafter. | Data in forest plot | None |
| Sexton et al., 2012, USA, Case Control | N=57 | NR | Depressed- Beck >= 10 | Self-report, LTPA |  | Women were divided into those who sustained and recovered from depression in the postpartum period. Differences in PA between the two groups were noted. | Never-7/wk | NR | NR | Various PA | NR | Crude: 0.27 (95% CI = 0.08-0.92) "higher frequency of prenatal exercise behaviors (OR 0.27, 95% CI 0.0.08-0.92) [was a] significant predictor of post-partum recovery. | None |
| Shim et al., 2007, South Korea, Non RCT | E: 32 C: 30 | E: 28.1 + 2.9 C: 28.6 + 3.2 | women had lumbar and/or posterior pelvic pain at baseline. | Self-report, LTPA |  | 6 sets of exercises: pelvic tilting, knee pull, straight leg raising, curl up, lateral straight leg raising, and the Kegel exercise. 12-week program; Total sessions: 60-84 | 5-7/wk | NR | NR | PFMT, VPA | NR | Data in forest plot | None |
| Songoygard et al., 2012, Norway, RCT | E: 379 C: 340 | E: 30.6 + 4.3 C: 30.6 + 4.2 | Not active in participation in a structured exercise programme (<60 minutes once per week), including brisk walking (<120 minutes per week) | Self-Report, LTPA |  | Women in the intervention group received a standardized exercise program including aerobic activity, strength training, and balance exercises. Training sessions of 60 minutes in groups of 8 –15 women instructed by a physiotherapist were offered once per week over a period of 12 weeks (between 20 and 36 gestation weeks). Each group session consisted of three parts. The first included 30 –35 minutes of low-impact aerobics (no running or jumping). Step length and body rotations were reduced to a minimum, and crossing of legs and sharp and sudden changes of position were avoided. The aerobic dance program was performed at moderate intensity, defined as 13 and 14 on the Borg rating scale of perceived exertion. The second included 20 –25 minutes of strength exercises using body weight as resistance, including exercises for the upper and lower limbs, back extensors, deep abdominal muscles, and pelvic floor muscles. Three sets of 10 repetitions of each exercise were performed. The third included 5–10 minutes of light stretching, body awareness, breathing, and relaxation exercises. In addition, women were encouraged to follow a written 45-minute home exercise program at least twice per week (30 minutes of endurance training and 15 minutes of strength and balance exercises). Adherence to the protocol was defined as exercising 3 days per week or more at moderate to high intensity. Performing the exercise program was strongly emphasized and recorded in the women’s personal training diaries and through reports from the physiotherapists leading the training groups. | 3/wk | BORG: 13-14 | 60 mins | VaPA | E: 55% of women followed recommended exercise protocol". 95% reported weekly PFMT at follow-up; C:10% in control group exercised 3 days per week or more at moderate to high intensity at follow-up". 79% reported weekly PFMT at follow-up | Data in forest plot | None |
| Strøm et al., 2009, Denmark, Cohort | Not Physically Active: 44 372; Active Group: 26 494; Moderately Active: 17 466; Vigorously Active: 9 028 | NR |  | Self-report, LTPA |  | Not physically active: responded negatively to the question: asked, “Now that you are pregnant, do you engage in any kind of exercise?” Physically active: responded positively to the above question Moderately Active: Less than 25% of PA time spent in high intensity activity (>6METS) Vigorously Active: Greater than 25% of PA time spent in higher intensity activity (>6METS) | NR | M PA: <25% PA at high intensity (>6METS) VPA: >25% PA at high intensity (>6METS) | NR | Various PA | NR | Crude:  Active: 1.01 (95% CI= 0.73–1.39) Moderately Active: 1.12 (95% CI= 0.78–1.60) Vigorously Active: 0.80 (95% CI= 0.47–1.36)  Adjusted: Adjusted for maternal age, parity, pre-pregnant body mass index, alcohol intake, smoking, occupation, education, home ownership, marital status, social support, and history of previous depression. Active: 1.10 (95 % CI = 0.79–1.53) Moderately Active: 1.20 (95% CI= 0.83–1.72) Vigorously Active: 0.88 (95% CI = 0.52–1.52) | None |
| Taniguchi et al., 2016, Japan, RCT (33159) | E: 60  C: 58 | E: 28.5 + 3.5 C: 29.5 + 3.0 | Sedentary | Objective, LTPA | Unsupervised exercise intervention beginning after 30 weeks gestation. | The participants in the walking group were instructed to walk briskly for 30 min, three or more times per week, from 30weeks’ gestation until delivery, recording on a daily basis time spent walking (min), the number of steps at starting and finishing brisk walking and the difference between these values. | 3+/week | not reported | 30 minutes | counseling brisk walk | 59.3% completed 80% or more of the walking program | Data in forest plot | None |
| Tendais et al., 2011, Portugal, Cohort | 78 (56 completed both assessments and were included in the analysis) | 30.4 + 4.0 | Women reporting 150 minutes of moderate physical activity per week, 60 minutes of vigorous physical activity or at least 450 METs of combined moderate and vigorous physical activity pre-pregnancy and also 150 minutes of exercise per week | Self-report, LTPA |  | Active: "Women reporting 150 minutes of moderate physical activity per week, 60 minutes of vigorous physical activity or at least 450 METs of combined moderate and vigorous physical activity pre-pregnancy and also 150 minutes of exercise per week  Low Active: "those who reported no activity or less than the recommended level per week." "Based on this classification, women were divided into four groups for analysis: low active both at pre-pregnancy and at 10-15 weeks of pregnancy, low active pre-pregnancy and active at 10-15 weeks of pregnancy, active both at pre-pregnancy and at 10-15 weeks of pregnancy, active pre-pregnancy and low active at 10-15 weeks of pregnancy." | NR | MVPA | 60 minutes (vig)/week 150 minute (mod)/week | Various PA | NR | Data in forest plot | None |
| Uebelacker et al., 2016, USA, RCT | E: 12 C: 8 | E: 28.0(5.9) C: 28.9(6) | Depressed. | Objective, LTPA | Supervised exercise starting 12-26 weeks gestation. | "Yoga; supervised once per week plus practice at home. Reported average total minutes per week of yoga (includes class- supervised + home- self-reported). number of classes attended MEAN 5.67 SD 2.84; average minutes per week of yoga at home mean 45.60 SD 51.95 (at home yoga was self-reported)" | 1/wk | NR | NR | Yoga | E: 63% C: 67% # of classes attended out of 9 weeks, once per week; Average=6.0+-2.98 | Data in forest plot | None |
| Ussher et al., 2015, UK, RCT | E: 383 C: 389 | E: 27.2 + 6.1 C: 27.8 + 6.5 | Smoking during pregnancy. | Objective, LTPA | Supervised intervention starting 10-24 weeks gestation. All women were smokers. | Intervention: Fourteen sessions of supervised exercise were offered over eight weeks; twice a week for six weeks then weekly for two weeks. At each session, the participants walked at a moderate intensity on a treadmill for up to 30 minutes. Immediately before each treadmill session, the women received behavioural support. At the first two treadmill sessions, and then on every other occasion (total of nine consultations), this support aimed to identify opportunities to incorporate physical activity into women’s lives, to motivate them to use physical activity to reduce the urge to smoke, and to help them use behavioural strategies to improve adherence to these plans. These 20 minute consultations incorporated 19 behaviour change techniques, as described in the study protocol.15 The women were advised to be active for at least 10 minutes at a time, progressing towards 30 minutes of activity on at least five days a week. The emphasis was on brisk walking, and pedometers were supplied, with researchers setting individualized step count targets. Intervention began between 10-24 weeks gestation. | 1-2x/wk 5x/wk - unsupervised | Moderate | 10-30 mins | Walk | Physical activity increased after baseline, but the increase was significantly greater in the physical activity group, by 33% (95% CI 14%-56%), 28% (7%-52%), and 36% (12%-65%) at one week, four weeks, and six weeks post-quit day, respectively. 87% provided valid data; 37 were in the exercise group - accelerometer; asked 90 patients to wear it during 4th week after quitting smoking; | Data in forest plot | Behavioural counselling. |
| Vieten et al., 2008, USA, RCT | E: 13 C: 18 | 33.9(3.8) |  | Self-report, LTPA | Supervised and self-reported starting between 12-30 weeks gestation. | "Women in second and third trimesters between 12 and 30 weeks pregnant at the time of baseline assessment. The Mindful Motherhood intervention incorporates three approaches to cultivating mindfulness: (1) mindfulness of thoughts and feelings through breath awareness and contemplative practices, (2) mindfulness of the body through guided body awareness meditation and mindful hatha yoga, and (3) presentation of psychological concepts that incorporate mindfulness such as acceptance and cultivation of an observing self. Each of these elements accounted for approximately one-third of the intervention. The intervention contained approximately equal parts education, discussion, and experiential exercises, with more weight on education in the early sessions, and more on discussion and experiential exercises in the later sessions. Adaptations of typical mindfulness-based intervention components included, for example, (1) inclusion of awareness of the developing fetus and belly during the body scan meditation; (2) use of explanatory examples and exercises having to do with pregnancy and early parenting such as mindfulness regarding pain or sleep issues during pregnancy, anxiety about labor, or dealing with a difficult-to-console infant; and (3) greater inclusion of walking and moving mindfulness practices and forms of mindful movement that have been tailored for pregnant women such a prenatal yoga. An intervention manual is available from the authors. Participants were provided with weekly readings relevant to the material presented in class, as well as a compact disc with three 20min guided meditations, which they were encouraged to utilize daily. The training was 2 h in duration per week for 8 weeks and was facilitated by a licensed clinical psychologist trained in mindfulness-based interventions, as well as a certified prenatal yoga instructor" 8 sessions - 8 week intervention | 1/wk | NR | 120 mins | Yoga | NR | Data in forest plot | Education |

Online Supplement Table 2: The association between prenatal exercise and prenatal depressive symptom severity and depression.

| **Quality assessment** | | | | | | | **№ of participants** | | **Effect** | | **Quality** | **Importance** |
| --- | --- | --- | --- | --- | --- | --- | --- | --- | --- | --- | --- | --- |
| **№ of studies** | **Study design** | **Risk of bias** | **Inconsistency** | **Indirectness** | **Imprecision** | **Other considerations** | **prenatal exercise** | **no exercise** | **Relative (95% CI)** | **Absolute (95% CI)** |
| Association between prenatal exercise (exercise-only interventions and exercise + co-interventions) and prenatal depressive symptoms | | | | | | | | | | | | |
| 21 (pooled estimate of effect, n = 19; 2 studies reported narratively | randomized trials | serious a | serious b | serious c | not serious | none | 1722 | 1719 | - | SMD **0.23 SD lower** (0.37 lower to 0.09 lower) | ⨁◯◯◯ VERY LOW | CRITICAL |
| Narrative Synthesis: A superiority RCT comparing yoga (n=51) with non-yoga (n=45) antenatal exercises showed an improvement in depressive symptoms with yoga, but not with other antenatal exercise (Satyapriya 2013). In contrast, one RCT found no influence of prenatal exercise on the severity of depressive symptoms during pregnancy (exercise = 429, control = 426; Gustafsson 2015). | | | |
| Sensitivity analysis: Association between exercise-only interventions and prenatal depressive symptoms | | | | | | | | | | | | |
| 15 (pooled estimate of effect, n =13; 2 studies reported narratively) | randomized trials | serious d | not serious | not serious | not serious | none | 590 | 585 | - | SMD **0.39 SD lower** (0.51 lower to 0.26 lower) | ⨁⨁⨁◯ MODERATE | CRITICAL |
| Narrative Synthesis: A superiority RCT comparing yoga (n=51) with non-yoga (n=45) antenatal exercises showed an improvement in depressive symptoms with yoga, but not with other antenatal exercise (Satyapriya 2013). In contrast, one RCT found no influence of prenatal exercise on the severity of depressive symptoms during pregnancy (exercise = 429, control = 426; Gustafsson 2015). | | | |
| Sensitivity analysis: Association between exercise + co-interventions and prenatal depressive symptoms | | | | | | | | | | | | |
| 6 | randomized trials | serious e | serious b | serious f | not serious | none | 1132 | 1134 | - | SMD **0.05 higher** (0.03 lower to 0.13 higher) | ⨁◯◯◯ VERY LOW | CRITICAL |
| Subgroup analysis: Association between exercise-only interventions including aerobic exercise alone and depressive symptoms | | | | | | | | | | | | |
| 3 | randomized trials | not serious g | serious b | not serious | not serious | none | 176 | 177 | - | SMD **0.37 lower** (0.74 lower to 0 ) | ⨁⨁⨁◯ MODERATE | CRITICAL |
| Subgroup analysis: Association between exercise-only interventions including yoga alone and depressive symptoms | | | | | | | | | | | | |
| 7 | randomized trials | serious h | not serious | not serious | not serious | none | 159 | 157 | - | SMD **0.26 lower** (0.49 lower to 0.04 lower) | ⨁⨁⨁◯ MODERATE | CRITICAL |
| Subgroup analysis: Association between exercise-only interventions including combinations of different types of exercise and depressive symptoms | | | | | | | | | | | | |
| 4 (pooled estimate of effect, n =3; 1 study reported narratively) | randomized trials | serious i | not serious | not serious | not serious | none | 255 | 251 | - | SMD **0.52 lower** (0.69 lower to 0.34 lower) | ⨁⨁⨁◯ MODERATE | CRITICAL |
| Narrative Summary: 1 RCT found no influence of prenatal exercise on the severity of depressive symptoms during pregnancy (exercise = 429, control = 426; Gustafsson 2015). | | | |
| Subgroup analysis: Association between exercise-only interventions and prenatal depressive symptoms in women with depression | | | | | | | | | | | | |
| 6 | randomized trials | serious a | not serious | not serious | not serious | none | 130 | 135 | - | SMD **0.24 lower** (0.49 lower to 0 ) | ⨁⨁⨁◯ MODERATE | CRITICAL |
| Subgroup analysis: Association between exercise-only interventions and prenatal depressive symptoms in women without depression | | | | | | | | | | | | |
| 7 | randomized trials | not serious | not serious | not serious | not serious | none | 460 | 450 | - | SMD **0.44 SD lower** (0.6 lower to 0.27 lower) | ⨁⨁⨁⨁ HIGH | CRITICAL |
| Subgroup analysis: Association between exercise-only interventions and prenatal depressive symptoms in women with unspecified depression status | | | | | | | | | | | | |
| 2 | randomized trials | serious a | not serious | not serious |  | none | Narrative Synthesis: A superiority RCT comparing yoga (n=51) with non-yoga (n=45) antenatal exercises showed an improvement in depressive symptoms with yoga, but not with other antenatal exercise (Satyapriya 2013). In contrast, one RCT found no influence of prenatal exercise on the severity of depressive symptoms during pregnancy (exercise = 429, control = 426; Gustafsson 2015). | | | | - | CRITICAL |
| Subgroup analysis: Association between exercise-only interventions and prenatal depressive symptoms in women who were previously sedentary | | | | | | | | | | | | |
| 1 | randomized trials | not serious | serious j | not serious | not serious k | none | 54 | 53 | - | SMD **0.19 lower** (0.57 lower to 0.19 higher) | ⨁⨁⨁◯ MODERATE | CRITICAL |
| Subgroup analysis: Association between exercise-only interventions and prenatal depressive symptoms in women with previously unspecified physical activity levels | | | | | | | | | | | | |
| 14 (pooled estimate of effect, n =12; 2 studies reported narratively | randomized trials | serious d | not serious | not serious | not serious | none | 536 | 532 | - | SMD **0.41 lower** (0.54 lower to 0.27 lower) | ⨁⨁⨁◯ MODERATE | CRITICAL |
| Narrative Synthesis: A superiority RCT comparing yoga (n=51) with non-yoga (n=45) antenatal exercises showed an improvement in depressive symptoms with yoga, but not with other antenatal exercise (Satyapriya 2013). In contrast, one RCT found no influence of prenatal exercise on the severity of depressive symptoms during pregnancy (exercise = 429, control = 426; Gustafsson 2015). | | | |
| Subgroup analysis: Association between exercise-only interventions and prenatal depressive symptoms in women with overweight or obesity | | | | | | | | | | | | |
| 1 | randomized trials | serious l | serious j | not serious | not serious k | none | 45 | 53 | - | SMD **0.68 lower** (1.09 lower to 0.27 lower) | ⨁⨁◯◯ LOW | CRITICAL |
| Subgroup analysis: Association between exercise-only interventions and prenatal depressive symptoms in women from the general population (i.e., any weight status) | | | | | | | | | | | | |
| 14 (pooled estimate of effect, n =12; 2 studies reported narratively | randomized trials | serious d | not serious | not serious | not serious | none | 545 | 532 | - | SMD **0.36 SD lower** (0.48 lower to 0.24 lower) | ⨁⨁⨁◯ MODERATE | CRITICAL |
| Narrative Synthesis: A superiority RCT comparing yoga (n=51) with non-yoga (n=45) antenatal exercises showed an improvement in depressive symptoms with yoga, but not with other antenatal exercise (Satyapriya 2013). In contrast, one RCT found no influence of prenatal exercise on the severity of depressive symptoms during pregnancy (exercise = 429, control = 426; Gustafsson 2015). | | | |
| Subgroup analysis: Association between exercise-only interventions and prenatal depressive symptoms in women who were unsupervised during exercise | | | | | | | | | | | | |
| 1 | randomized trials | not serious | serious j | not serious | not serious k | none | 54 | 53 | - | SMD **0.19 lower** (0.57 lower to 0.19 higher) | ⨁⨁⨁◯ MODERATE | CRITICAL |
| Subgroup analysis: Association between exercise-only interventions and prenatal depressive symptoms in women who were supervised during exercise | | | | | | | | | | | | |
| 14 (pooled estimate of effect, n =12; 2 studies reported narratively | randomized trials | serious d | not serious | not serious | not serious | none | 536 | 532 | - | SMD **0.41 lower** (0.54 lower to 0.27 lower) | ⨁⨁⨁◯ MODERATE | CRITICAL |
| Narrative Synthesis: A superiority RCT comparing yoga (n=51) with non-yoga (n=45) antenatal exercises showed an improvement in depressive symptoms with yoga, but not with other antenatal exercise (Satyapriya 2013). In contrast, one RCT found no influence of prenatal exercise on the severity of depressive symptoms during pregnancy (exercise = 429, control = 426; Gustafsson 2015 (31794)). | | | |
| Subgroup analysis: Association between exercise-only interventions including aerobic exercise only and prenatal depressive symptoms | | | | | | | | | | | | |
| 3 | randomized trials | not serious m | serious b | not serious | not serious | none | 176 | 177 | - | SMD **0.37 SD lower** (0.74 lower to 0 ) | ⨁⨁⨁◯ MODERATE | CRITICAL |
| Subgroup analysis: Association between exercise-only interventions including non-aerobic exercise (yoga) only and prenatal depressive symptoms | | | | | | | | | | | | |
| 7 | randomized trials | serious a | serious b | not serious | not serious | none | 159 | 157 | - | SMD **0.26 SD lower** (0.49 lower to 0.04 lower) | ⨁⨁◯◯ LOW | CRITICAL |
| Subgroup analysis: Association between exercise-only interventions including mixed exercise (combinations of different type of exercise) and prenatal depressive symptoms | | | | | | | | | | | | |
| 5 (pooled estimate of effect, n =3; 2 studies reported narratively | randomized trials | serious n | not serious | not serious | not serious | none | 255 | 251 | - | SMD **0.52 lower** (0.69 lower to 0.34 lower) | ⨁⨁⨁◯ MODERATE | CRITICAL |
| Narrative Synthesis: A superiority RCT comparing yoga (n=51) with non-yoga (n=45) antenatal exercises showed an improvement in depressive symptoms with yoga, but not with other antenatal exercise (Satyapriya 2013). In contrast, one RCT found no influence of prenatal exercise on the severity of depressive symptoms during pregnancy (exercise = 429, control = 426; Gustafsson 2015 (31794)). | | | |
| Subgroup analysis: Association between exercise-only interventions and prenatal depressive symptoms measured using the Edinburgh Postnatal Depression Scale (EPDS) | | | | | | | | | | | | |
| 5 | randomized trials | not serious g | not serious | not serious | not serious | none | 185 | 174 | - | SMD **0.3 lower** (0.51 lower to 0.09 lower) | ⨁⨁⨁⨁ HIGH | CRITICAL |
| Subgroup analysis: Association between exercise-only interventions and prenatal depressive symptoms measured using the EPDS (weighted mean difference) | | | | | | | | | | | | |
| 5 | randomized trials | not serious g | not serious | not serious | not serious | none | 185 | 174 | - | MD **1 lower** (1.79 lower to 0.21 lower) | ⨁⨁⨁⨁ HIGH | CRITICAL |
| Subgroup analysis: Association between exercise-only interventions and prenatal depressive symptoms measured using the Center for Epidemiologic Studies Depression Scale (CES-D) | | | | | | | | | | | | |
| 8 | randomized trials | serious n | not serious | not serious | not serious | none | 391 | 397 | - | SMD **0.41 lower** (0.6 lower to 0.22 lower) | ⨁⨁⨁◯ MODERATE | CRITICAL |
| Subgroup analysis: Association between exercise-only interventions and prenatal depressive symptoms measured using the CES-D (weighted mean difference) | | | | | | | | | | | | |
| 8 | randomized trials | serious n | not serious | not serious | not serious | none | 391 | 397 | - | MD **3.89 lower** (5.25 lower to 2.54 lower) | ⨁⨁⨁◯ MODERATE | CRITICAL |
| Evidence from non-randomized interventions: Association between exercise-only interventions and prenatal depressive symptoms | | | | | | | | | | | | |
| 4 | observational studies o | serious p | serious b | not serious | not serious | none | 215 | 205 | - | SMD **0.81 lower** (1.14 lower to 0.49 lower) | ⨁◯◯◯ VERY LOW | CRITICAL |
| Evidence from non-randomized interventions; subgroup analysis: Association between exercise-only interventions and prenatal depressive symptoms in women from the general population (i.e., any weight status) | | | | | | | | | | | | |
| 3 | observational studies o | serious q | serious b | not serious | not serious | none | 147 | 132 | - | SMD **0.93 lower** (1.3 lower to 0.56 lower) | ⨁◯◯◯ VERY LOW | CRITICAL |
| Evidence from non-randomized interventions; subgroup analysis: Association between exercise-only interventions and prenatal depressive symptoms in women with overweight/obesity | | | | | | | | | | | | |
| 1 | observational studies o | serious r | serious j | not serious | not serious k | none | 68 | 73 | - | SMD **0.51 lower** (0.85 lower to 0.17 lower) | ⨁◯◯◯ VERY LOW | CRITICAL |
| Evidence from non-randomized interventions; subgroup analysis: Association between exercise-only interventions and prenatal depressive symptoms in women who were supervised during exercise | | | | | | | | | | | | |
| 3 | observational studies o | serious q | serious b | not serious | not serious | none | 147 | 132 | - | SMD **0.93 lower** (1.3 lower to 0.56 lower) | ⨁◯◯◯ VERY LOW | CRITICAL |
| Evidence from non-randomized interventions; subgroup analysis: Association between exercise-only interventions and prenatal depressive symptoms in women who were unsupervised during exercise | | | | | | | | | | | | |
| 1 | observational studies o | serious r | serious j | not serious | not serious k | none | 68 | 73 | - | SMD **0.51 lower** (0.85 lower to 0.17 lower) | ⨁◯◯◯ VERY LOW | CRITICAL |
| Evidence from cohort studies: Association between prenatal exercise and prenatal depressive symptoms | | | | | | | | | | | | |
| 8 (pooled estimate of effect, n =3; 5 studies reported narratively | observational studies s | serious t | not serious | not serious | serious u | none | 94 | 170 | - | SMD **0.16 SD lower** (0.47 lower to 0.14 higher) | ⨁◯◯◯ VERY LOW | CRITICAL |
| Narrative Synthesis: Five cohort studies were included (n=5,060). 4/5 (n=4,982) reported a favourable effect of prenatal exercise on depressive symptoms (Gjestland 2013; Demissie 2011; Orr 2006; Downs 2008).  1/5 (n=78) reported no association between depression scores and physical activity (Tendais 2011). | | | |
| Evidence from case-control studies: Association between prenatal exercise and prenatal depressive symptoms | | | | | | | | | | | | |
| 2 (pooled estimate of effect, n =1; 1 study reported narratively | observational studies v | not serious | serious j | not serious | not serious k | none | 39 | 17 | - | MD **0.2 lower** (0.49 lower to 0.09 higher) | ⨁◯◯◯ VERY LOW | CRITICAL |
| Narrative Summary: One case-control study was included (case, n=80; control, n=258) and indicated that women meeting the recommendations for 150 minutes/week of moderate intensity physical activity had similar depressive symptoms when compared to women not meeting the recommendations (OR = 1.94; 95%CI: 0.83, 4.56 adjusted for age, parity, education and pre-pregnancy body mass index. Kolu 2014) | | | |
| Evidence from cross-sectional studies: Association between prenatal exercise and prenatal depressive symptoms | | | | | | | | | | | | |
| 4 (pooled estimate of effect, n =1; 3 study reported narratively | observational studies w | serious x | not serious | not serious | not serious | none | 117 | 86 | - | MD **11.26 lower** (14.36 lower to 8.16 lower) | ⨁◯◯◯ VERY LOW | CRITICAL |
| Narrative Synthesis: Three cross-sectional studies were included (n=439). 3/3 indicated an inverse association between prenatal physical activity level and prenatal depressive symptoms (Loprinzi 2012; Petrovic 2016; de Wit 2015). | | | |
| Association between prenatal exercise (exercise-only interventions and exercise + co-interventions) and prenatal depression | | | | | | | | | | | | |
| 8 | randomized trials | serious n | serious b | serious c | not serious | none | 121/1257 (9.6%) | 158/1224 (12.9%) | **OR 0.55** (0.34 to 0.90) | **54 fewer per 1 000** (from 11 fewer to 81 fewer) | ⨁◯◯◯ VERY LOW | CRITICAL |
| Sensitivity analysis: Association between exercise-only interventions and prenatal depression | | | | | | | | | | | | |
| 5 | randomized trials | serious n | not serious | not serious | not serious | none | 32/354 (9.0%) | 72/329 (21.9%) | **OR 0.33** (0.21 to 0.53) | **134 fewer per 1 000** (from 90 fewer to 163 fewer) | ⨁⨁⨁◯ MODERATE | CRITICAL |
| Sensitivity analysis: Association between exercise + co-interventions and prenatal depression | | | | | | | | | | | | |
| 3 | randomized trials | serious e | not serious | serious c | serious u | none | 89/903 (9.9%) | 86/895 (9.6%) | **OR 1.02** (0.75 to 1.40) | **2 more per 1 000** (from 22 fewer to 33 more) | ⨁◯◯◯ VERY LOW | CRITICAL |
| Subgroup analysis: Association between exercise-only interventions including aerobic exercise alone and depression | | | | | | | | | | | | |
| 2 | randomized trials | serious e | not serious | not serious | not serious | none | 4/137 (2.9%) | 12/140 (8.6%) | **OR 0.31** (0.10 to 1.00) | **57 fewer per 1 000** (from 0 fewer to 76 fewer) | ⨁⨁⨁◯ MODERATE | CRITICAL |
| Subgroup analysis: Association between exercise-only interventions including combinations of different types of exercise and depression | | | | | | | | | | | | |
| 3 | randomized trials | serious n | not serious | not serious | not serious | none | 28/217 (12.9%) | 60/189 (31.7%) | **OR 0.33** (0.20 to 0.56) | **184 fewer per 1 000** (from 111 fewer to 232 fewer) | ⨁⨁⨁◯ MODERATE | CRITICAL |
| Evidence from non-randomized interventions: Association between exercise-only interventions and prenatal depression | | | | | | | | | | | | |
| 1 | observational studies o | serious y | serious j | not serious | not serious k | none | 13/50 (26.0%) | 41/50 (82.0%) | **OR 0.08** (0.03 to 0.20) | **553 fewer per 1 000** (from 343 fewer to 700 fewer) | ⨁◯◯◯ VERY LOW | CRITICAL |
| Evidence from cohort studies: Association between prenatal exercise and prenatal depression | | | | | | | | | | | | |
| 1 | observational studies s | serious z | serious j | not serious | not serious k | none | 3/53 (5.7%) | 24/127 (18.9%) | **OR 0.26** (0.07 to 0.90) | **132 fewer per 1 000** (from 16 fewer to 173 fewer) | ⨁◯◯◯ VERY LOW | CRITICAL |
| Evidence from cross-sectional studies : Association between prenatal exercise and prenatal depression | | | | | | | | | | | | |
| 1 | observational studies w | serious aa | serious j | not serious | not serious k | none | Narrative Summary: Bowen (2009) found that women who did at least 20 minutes of exercise per day during pregnancy were less likely to experience prenatal depression (assessed using the Edinburgh Postnatal Depression Scale) than women who exercise occasionally (OR 2.23, 95%CI 1.26, 3.92) or did not exercise during pregnancy (OR 3.18, 95%CI 1.47, 6.87). | | | | ⨁◯◯◯ VERY LOW | CRITICAL |

**CI:** Confidence interval; **SMD:** Standardised mean difference; **MD:** Mean difference; **OR:** Odds ratio; * Unless otherwise stated, all studies are included in the pooled estimate.

Explanations

a. Serious risk of bias. High risk of performance bias. Unclear risk of selection bias; it was unknown if allocation adequately concealed. Reporting bias was an issue in one study and one study did not have a non-exercise control group (superiority trial); results were reported narratively.

b. Serious inconsistency. High heterogeneity (I2 > 50%).

c. Serious indirectness. Exercise-only interventions and exercise + co-interventions were combined for analysis.

d. Serious risk of bias. High risk of performance bias and attrition bias. Unclear risk of selection bias; it was unknown if allocation adequately concealed. Reporting bias was an issue in one study and one study did not have a non-exercise control group (superiority trial); results were reported narratively.

e. Serious risk of bias. High risk of performance bias.

f. Serious indirectness. Exercise was combined with a co-intervention.

g. No serious risk of bias. Unclear risk of selection; it was unknown if allocation was adequately concealed.

h. Serious risk of bias. High risk of performance and attrition bias. Unclear risk of selection bias; it was unknown if the methods of sequence generation and allocation concealment were adequate.

i. Serious risk of bias. High risk of performance bias and attrition bias. Unclear risk of selection bias; it was unknown if allocation adequately concealed. Reporting bias was an issue in one study; results were reported narratively.

j. Serious inconsistency. Only one study was included.

k. No serious imprecision; only one study but already downgraded for serious inconsistency for this reason.

l. Serious risk of bias. High risk of attrition bias.

m. No serious risk of bias. Unclear risk of selection; it was unknown if sequence generation was adequate.

n. Serious risk of bias. High risk of attrition bias. Unclear risk of selection bias; it was unknown if allocation was adequately concealed.

o. Non-randomized interventions

p. Serious risk of bias. High risk of performance bias (compliance to the intervention not reported; women who did not complete the majority of the intervention [>75%] were excluded) and attrition bias.

q. Serious risk of bias. High risk of performance bias (compliance to the intervention not reported, women who did not complete the majority of the intervention [>75%] were excluded; active and inactive groups were made on the basis of compliance to physical activity recommendation at the end of the intervention) and attrition bias.

r. Serious risk of bias. High risk of performance bias (active and inactive groups made on the basis of compliance to physical activity level at the end of a weight restriction program) and attrition bias.

s. Cohort studies

t. Serious risk of bias. High risk of performance bias (potentially flawed measurement of the exposure; unknown validity of physical activity measure) and reporting bias (incomplete reporting of data in four studies such that they could not be included in the meta-analysis; results were reported narratively).

u. Serious imprecision. The 95% CI crosses the line of no effect, and is wide, such that the interpretation of the data would be different if the true effect were at one end of the CI or the other.

v. Case-control study

w. Cross sectional study

x. Serious risk of bias. High risk of performance bias (potentially flawed measurement of the exposure; unknown validity of retrospective physical activity measure) and reporting bias (incomplete reporting of data in all studies such that they could not be included in the meta-analysis; results were reported narratively).

y. Serious risk of bias. High risk of performance and attrition bias (all women who did not complete the majority of the intervention [80%] were excluded). Unclear risk of selection bias; it was unknown if the methods of sequence generation and allocation concealment were adequate.

z. Serious risk of bias. High risk of performance bias (potentially flawed measurement of the exposure; unknown validity of physical activity measure).

aa. Serious risk of bias. High risk of performance bias (potentially flawed measurement of the exposure; tool used to measure physical activity not mentioned) and reporting bias (incomplete reporting of data in the study such that it could not be included in the meta-analysis; results were reported narratively).

Online Supplement Table 3: The association between prenatal exercise and postnatal depressive symptoms and depression.

| **Quality assessment** | | | | | | | **№ of participants** | | **Effect** | | **Quality** | **Importance** |
| --- | --- | --- | --- | --- | --- | --- | --- | --- | --- | --- | --- | --- |
| **№ of studies** | **Study design** | **Risk of bias** | **Inconsistency** | **Indirectness** | **Imprecision** | **Other considerations** | **Prenatal exercise** | **no exercise** | **Relative (95% CI)** | **Absolute (95% CI)** |
| Association between prenatal exercise (exercise-only interventions and exercise + co-interventions) and postnatal depressive symptoms | | | | | | | | | | | | |
| 7 a | randomized trials | serious b | not serious | serious c | not serious | none | 1408 | 1387 | - | SMD **0.05 higher** (0.02 lower to 0.12 higher) | ⨁⨁◯◯ LOW | CRITICAL |
| Sensitivity analysis: Association between exercise-only interventions and postnatal depressive symptoms | | | | | | | | | | | | |
| 4 | randomized trials | serious b | not serious | not serious | serious d | none | 537 | 496 | - | SMD **0.01 lower** (0.13 lower to 0.12 higher) | ⨁⨁◯◯ LOW | CRITICAL |
| Sensitivity analysis: Association between exercise + co-interventions and postnatal depressive symptoms | | | | | | | | | | | | |
| 3 | randomized trials | serious b | not serious | serious e | not serious | none | 871 | 891 | - | SMD **0.08 higher** (0.01 lower to 0.18 higher) | ⨁⨁◯◯ LOW | CRITICAL |
| Subgroup analysis: Association between exercise-only interventions including yoga alone and postnatal depressive symptoms | | | | | | | | | | | | |
| 3 | randomized trials | serious f | not serious | not serious | not serious | none | 158 | 156 | - | SMD **0.02 lower** (0.24 lower to 0.2 higher) | ⨁⨁⨁◯ MODERATE | CRITICAL |
| Subgroup analysis: Association between exercise-only interventions including combinations of different types of exercise and postnatal depressive symptoms | | | | | | | | | | | | |
| 1 | randomized trials | serious g | serious h | not serious | not serious i | none | 379 | 340 | - | SMD **0**  (0.15 lower to 0.15 higher) | ⨁⨁◯◯ LOW | CRITICAL |
| Evidence from non-randomized interventions: Association between exercise-only interventions and postnatal depressive symptoms | | | | | | | | | | | | |
| 3 (pooled estimate of effect, n =2; 1 study reported narratively | observational studies j | serious k | serious l | not serious | serious d | none | 135 | 117 | - | MD **0.69 lower** (1.91 lower to 0.52 higher) | ⨁◯◯◯ VERY LOW | CRITICAL |
| Narrative Summary: One non-randomized intervention including depressed women (intervention, n=34)(Battle 2015) demonstrated that a 10 week yoga intervention had a clinically meaningful decrease in depression severity. Using regression analysis, a dose-response relationship was observed where the more time spent practicing yoga, the greater reduction in depressive symptoms in a given week. | | | |
| Evidence from non-randomized interventions: subgroup analysis: Association between exercise-only interventions and postnatal depressive symptoms in women with overweight/obesity | | | | | | | | | | | | |
| 1 | observational studies j | serious m | serious h | not serious | not serious i | none | 73 | 70 | - | MD **1.5 lower** (2.89 lower to 0.11 lower) | ⨁◯◯◯ VERY LOW | CRITICAL |
| Evidence from non-randomized interventions: subgroup analysis: Association between exercise-only interventions and postnatal depressive symptoms in women from the general population (i.e., any weight status) | | | | | | | | | | | | |
| 1 | observational studies j | serious n | serious h | not serious | not serious i | none | 62 | 47 | - | MD **0.22 lower** (0.76 lower to 0.32 higher) | ⨁◯◯◯ VERY LOW | CRITICAL |
| Evidence from non-randomized interventions: subgroup analysis: Association between exercise-only interventions and postnatal depressive symptoms in women with unspecified body mass index | | | | | | | | | | | | |
| 1 | observational studies j | serious o | serious h | not serious | not serious i | none | Narrative Summary: One non-randomized intervention including depressed women (intervention, n=34)(Battle 2015) demonstrated that a 10 week yoga intervention had a clinically meaningful decrease in depression severity. Using regression analysis, a dose-response relationship was observed where the more time spent practicing yoga, the greater reduction in depressive symptoms in a given week. | | | | ⨁◯◯◯ VERY LOW | CRITICAL |
| Evidence from cohort studies: Association between prenatal exercise and postnatal depressive symptoms | | | | | | | | | | | | |
| 1 | observational studies p | serious q | serious h | not serious | not serious i | none | 26 | 8 | - | MD **2.71 lower** (4.93 lower to 0.49 lower) | ⨁◯◯◯ VERY LOW | CRITICAL |
| Evidence from cross-sectional studies: Association between prenatal exercise and postnatal depressive symptoms | | | | | | | | | | | | |
| 1 | observational studies r | very serious s | serious h | not serious | not serious i | none | Narrative Summary: Data from the North Carolina Pregnancy Risk Assessment Monitoring System 2004-2005 found no significant association between third trimester exercise and postnatal depressive symptoms (Ersek 2009). However, women who were physically active both before pregnancy and during the third trimester of pregnancy had a reduction in severity of depressive symptoms (OR 0.66, 95%CI 0.49, 0.87; after controlling for age and marital status). | | | | ⨁◯◯◯ VERY LOW | CRITICAL |
| Association between prenatal exercise (exercise-only interventions and exercise + co-interventions) and postnatal depression | | | | | | | | | | | | |
| 4 | randomized trials | serious t | not serious | serious c | serious d | none | 65/1270 (5.1%) | 70/1266 (5.5%) | **OR 0.91** (0.61 to 1.36) | **5 fewer per 1 000** (from 18 more to 21 fewer) | ⨁◯◯◯ VERY LOW | CRITICAL |
| Sensitivity analysis: Association between exercise-only interventions and postnatal depression | | | | | | | | | | | | |
| 2 | randomized trials | serious t | not serious | not serious | serious d | none | 7/417 (1.7%) | 13/376 (3.5%) | **OR 0.48** (0.18 to 1.22) | **18 fewer per 1 000** (from 7 more to 28 fewer) | ⨁⨁◯◯ LOW | CRITICAL |
| Sensitivity analysis: Association between exercise + co-interventions and postnatal depression | | | | | | | | | | | | |
| 2 | randomized trials | serious t | not serious | serious c | serious d | none | 58/853 (6.8%) | 57/890 (6.4%) | **OR 1.07** (0.73 to 1.57) | **4 more per 1 000** (from 16 fewer to 33 more) | ⨁◯◯◯ VERY LOW | CRITICAL |
| Subgroup analysis: Association between exercise-only interventions including yoga alone and postnatal depression | | | | | | | | | | | | |
| 1 | randomized trials | serious b | serious h | not serious | not serious i | none | 4/379 (1.1%) | 8/340 (2.4%) | **OR 0.44** (0.13 to 1.48) | **13 fewer per 1 000** (from 11 more to 20 fewer) | ⨁⨁◯◯ LOW | CRITICAL |
| Subgroup analysis: Association between exercise-only interventions including combinations of different types of exercise and postnatal depression | | | | | | | | | | | | |
| 1 | randomized trials | serious b | serious h | not serious | not serious i | none | 3/38 (7.9%) | 5/36 (13.9%) | **OR 0.53** (0.12 to 2.41) | **60 fewer per 1 000** (from 120 fewer to 141 more) | ⨁⨁◯◯ LOW | CRITICAL |
| Evidence from cohort studies: Association between prenatal exercise and postnatal depression | | | | | | | | | | | | |
| 1 | observational studies p | serious u | serious h | not serious | not serious i | none | 419/26494 (1.6%) | 886/44372 (2.0%) | **OR 0.79** (0.70 to 0.89) | **4 fewer per 1 000** (from 2 fewer to 6 fewer) | ⨁◯◯◯ VERY LOW | CRITICAL |
| Narrative Summary: Additional data from the Danish National Birth Cohort (Strom 2009) could not be included in the meta-analysis. They showed that women had a decreased odds of postpartum depression diagnosis if they were vigorously active (OR 0.81, 95%CI 0.66, 0.99), exercising 2-3 hours per week (OR 0.75, 95% CI 0.58-0.98) or achieving 8-15 MET h/week (OR 0.79, 95%CI 0.63, 0.99 compared to no exercise). All ORs were adjusted for maternal age, parity, pre-pregnancy BMI, alcohol intake, smoking, occupation, education, home ownership, marital status, social support and history of previous depression. | | | |
| Evidence from case-control studies: Association between prenatal exercise and postnatal depression | | | | | | | | | | | | |
| 1 | observational studies v | serious w | serious h | not serious | not serious i | none | Narrative Summary: One case-control study (n=57) (Sexton 2012) reported higher prenatal exercise frequency in women who were likely to be depressed during pregnancy (Beck Depression Index, BDI-II >10) predicted postpartum recovery of depression (OR 1.23, 95%CI 0.08, 0.92). | | | | ⨁◯◯◯ VERY LOW | CRITICAL |
| Evidence from cross-sectional studies: Association between prenatal exercise and postnatal depression | | | | | | | | | | | | |
| 1 | observational studies r | serious w | serious h | not serious | not serious i | none | Narrative Summary: One cross-sectional study (n=6,330) (Guida 2012) showed that women who did not exercise during the third trimester of pregnancy were more likely to experience postpartum depression than women who exercised 5 or more days per week (OR 1.36, 95% CI 1.15, 1.62). Exercising 1-4 times per week had no observable effect on postpartum depression (OR 1.10, 95% CI 0.93, 1.32). | | | | ⨁◯◯◯ VERY LOW | CRITICAL |

**CI:** Confidence interval; **SMD:** Standardised mean difference; **MD:** Mean difference; **OR:** Odds ratio

**Explanations**

a. Two studies included two assessment time points during postpartum. These studies were counted only once.

b. Serious risk of bias. High risk of performance bias.

c. Serious indirectness. Exercise-only interventions and exercise + co-interventions were combined for analysis.

d. Serious imprecision. The 95% CI crosses the line of no effect, and is wide, such that the interpretation of the data would be different if the true effect were at one end of the CI or the other.

e. Serious indirectness. Exercise was combined with a co-intervention.

f. Serious risk of bias. High risk of performance and attrition bias. Unclear risk of selection bias; it was unknown if the methods of sequence generation and allocation concealment were adequate.

g. Serious risk of bias. High risk of performance bias. Unclear risk of selection bias; it was unclear if the methods of sequence generation were adequate.

h. Serious inconsistency. Only one study was included.

i. No serious imprecision; only one study but already downgraded for serious inconsistency for this reason.

j. Non-randomized intervention

k. Serious risk of bias. High risk of performance and attrition bias (women who did not complete the majority of the intervention [>75%] were excluded; active and inactive groups made on the basis of compliance to physical activity recommendation at the end of the intervention). Reporting bias was an issue in one study (incomplete reporting of data such that it could not be included in the meta-analysis; results were reported narratively).

l. Serious inconsistency. High heterogeneity (I2≥50%).

m. Serious risk of bias. High risk of performance and attrition bias (active and inactive groups made on the basis of compliance to physical activity recommendation at the end of the intervention).

n. Serious risk of bias. High risk of performance and attrition bias (women who did not complete the majority of the intervention [>75%] were excluded).

o. Serious risk of bias. High risk of performance and attrition bias. Reporting bias was an issue in the study (incomplete reporting of data such that it could not be included in the meta-analysis; results were reported narratively).

p. Cohort study

q. Serious risk of bias. High risk of attrition and of other bias (extreme imbalance in baseline data between the groups likely to influence the outcome).

r. Cross sectional study

s. Very serious risk of bias. High risk of performance bias (potentially flawed measurement of the exposure; unknown validity of retrospective physical activity measure), detection bias (potentially flawed measurement of the outcome; unknown validity of postnatal depression symptoms measure). Reporting bias was an issue in this study (incomplete reporting of data such that it could not be included in the meta-analysis; results were reported narratively).

t. Serious risk of bias. High risk of performance bias.

u. Serious risk of bias. High risk of performance bias (potentially flawed measurement of the exposure; unknown validity of physical activity measure). Reporting bias was an issue in one study (incomplete reporting of data such that it could not be included in the meta-analysis; results were reported narratively).

v. Case-control study

w. Serious risk of bias. High risk of performance bias (potentially flawed measurement of the exposure; unknown validity of physical activity measure). Reporting bias was an issue in the study (incomplete reporting of data such that it could not be included in the meta-analysis; results were reported narratively).

Online Supplement Table 4: The association between prenatal exercise and prenatal anxiety symptoms and anxiety.

| **Quality assessment** | | | | | | | **№ of participants** | | **Effect** | | **Quality** | **Importance** |
| --- | --- | --- | --- | --- | --- | --- | --- | --- | --- | --- | --- | --- |
| **№ of studies *** | **Study design** | **Risk of bias** | **Inconsistency** | **Indirectness** | **Imprecision** | **Other considerations** | **prenatal exercise** | **no exercise** | **Relative (95% CI)** | **Absolute (95% CI)** |
| Association between prenatal exercise (exercise-only interventions and exercise + co-interventions) and prenatal State anxiety symptoms | | | | | | | | | | | | |
| 8 (pooled estimate of effect, n =7; 1 study reported narratively) | randomized trials | serious a | not serious | serious b | not serious | none | 843 | 846 | - | SMD **0.06 SD higher** (0.04 lower to 0.15 higher) | ⨁⨁◯◯ LOW | CRITICAL |
| Narrative Summary: A superiority RCT comparing yoga (n=51) with non-yoga (n=45) antenatal exercises showed an improvement in state anxiety symptoms with yoga, but not other antenatal exercise (Satyapriya 2013). | | | |
| Sensitivity analysis: Association between exercise-only interventions and prenatal State anxiety symptoms (all studies included supervised exercise, non-aerobic exercise: Tai Chi, Yoga) | | | | | | | | | | | | |
| 6 (pooled estimate of effect, n =5; 1 study reported narratively) | randomized trials | serious c | not serious | not serious | serious d | none | 136 | 140 | - | SMD **0.03 SD higher** (0.21 lower to 0.27 higher) | ⨁⨁◯◯ LOW | CRITICAL |
| Narrative Summary: A superiority RCT comparing yoga (n=51) with non-yoga (n=45) antenatal exercises showed an improvement in state anxiety symptoms with yoga, but not other antenatal exercise (Satyapriya 2013). | | | |
| Sensitivity analysis: Association between exercise + co-interventions and prenatal State anxiety symptoms | | | | | | | | | | | | |
| 2 | randomized trials | serious a | not serious | serious e | not serious | none | 707 | 706 | - | SMD **0.06 higher** (0.04 lower to 0.17 higher) | ⨁⨁◯◯ LOW | CRITICAL |
| Subgroup analysis: Association between exercise-only interventions and prenatal State anxiety symptoms (all studies included supervised exercise, non-aerobic exercise: Tai Chi, Yoga) in women with anxiety | | | | | | | | | | | | |
| 4 | randomized trials | serious f | not serious | not serious | serious d | none | 107 | 118 | - | SMD **0.09 higher** (0.17 lower to 0.36 higher) | ⨁⨁◯◯ LOW | CRITICAL |
| Subgroup analysis: Association between exercise-only interventions and prenatal State anxiety symptoms (all studies included supervised exercise, non-aerobic exercise: Tai Chi, Yoga) in women without anxiety | | | | | | | | | | | | |
| 1 | randomized trials | serious g | serious h | not serious | not serious i | none | 29 | 22 | - | SMD **0.27 SD lower** (0.83 lower to 0.28 higher) | ⨁⨁◯◯ LOW | CRITICAL |
| Evidence from non-randomized intervention: Association between exercise-only intervention and prenatal State anxiety symptoms | | | | | | | | | | | | |
| 1 | observational studies j | serious k | serious h | not serious | not serious i | none | Narrative Summary: Beddoe (2009) showed that seven weeks of a mindfulness-based yoga intervention did not reduced state anxiety symptoms, whether the intervention was introduced in 2nd or 3rd trimester of pregnancy (n=16). | | | | ⨁◯◯◯ VERY LOW | CRITICAL |
| Evidence from cohort studies: Association between prenatal exercise and prenatal State anxiety symptoms | | | | | | | | | | | | |
| 1 | observational studies l | serious m | serious h | not serious | not serious i | none | 38 | 142 | - | SMD **0.36 lower** (0.72 lower to 0 ) | ⨁◯◯◯ VERY LOW | CRITICAL |
| Evidence from cross-sectional studies: Association between prenatal exercise and prenatal State anxiety symptoms | | | | | | | | | | | | |
| 1 | observational studies n | not serious | serious h | not serious | not serious i | none | 117 | 86 | - | SMD **0.82 lower** (1.11 lower to 0.53 lower) | ⨁◯◯◯ VERY LOW | CRITICAL |
| Association between exercise + co-interventions and prenatal State anxiety | | | | | | | | | | | | |
| 2 | randomized trials | serious o | not serious | serious b | serious d | none | 126/779 (16.2%) | 110/755 (14.6%) | OR 1.12 (0.85 to 1.48) | **15 more per 1 000** (from 19 fewer to 56 more) | ⨁◯◯◯ VERY LOW | CRITICAL |
| Association between exercise-only interventions and prenatal Trait anxiety symptoms | | | | | | | | | | | | |
| 3 (pooled estimate of effect, n =2; 1 study reported narratively) | randomized trials | serious g | not serious | not serious | serious d | none | 49 | 41 | - | SMD **0.21 SD lower** (0.63 lower to 0.2 higher) | ⨁⨁◯◯ LOW | CRITICAL |
| Narrative Summary: A superiority RCT comparing yoga (n=51) with non-yoga (n=45) antenatal exercises showed an improvement in trait anxiety symptoms with yoga, but not other antenatal exercise (Satyapriya 2013). | | | |
| Evidence from non-randomized intervention: Association between exercise-only intervention and prenatal Trait anxiety symptoms | | | | | | | | | | | | |
| 1 | observational studies j | serious k | serious h | not serious | not serious i | none | Narrative Summary: Beddoe (2009) reported that 7 weeks of a mindfulness-based yoga intervention reduced trait anxiety symptoms when the intervention was introduced in the third (but not second trimester) (n=16). | | | | ⨁◯◯◯ VERY LOW | CRITICAL |
| Evidence from non-randomized interventions: Association between exercise + co-interventions and prenatal Trait anxiety symptoms | | | | | | | | | | | | |
| 1 | observational studies j | serious o | serious h | serious b | not serious i | none | 29 | 27 | - | SMD **0.23 lower** (0.76 lower to 0.29 higher) | ⨁◯◯◯ VERY LOW | CRITICAL |
| Evidence from cross-sectional studies: Association between prenatal exercise and prenatal Trait anxiety symptoms | | | | | | | | | | | | |
| 1 | observational studies n | not serious | serious h | not serious | not serious | none | 117 | 86 | - | SMD **0.82 SD lower** (1.11 lower to 0.53 lower) | ⨁◯◯◯ VERY LOW | CRITICAL |
| Evidence from case-control studies: Association between prenatal exercise and prenatal Trait anxiety symptoms | | | | | | | | | | | | |
| 1 | observational studies p | not serious | serious h | not serious | not serious i | none | 17 | 39 | - | MD **0.19 lower** (0.4 lower to 0.02 higher) | ⨁◯◯◯ VERY LOW | CRITICAL |
| Association between exercise + co-interventions and prenatal Trait anxiety | | | | | | | | | | | | |
| 1 | randomized trials | serious o | serious h | serious b | not serious i | none | 18/85 (21.2%) | 20/76 (26.3%) | OR 0.75 (0.36 to 1.56) | **52 fewer per 1 000** (from 95 more to 149 fewer) | ⨁◯◯◯ VERY LOW | CRITICAL |

**CI:** Confidence interval; **SMD:** Standardised mean difference; **OR:** Odds ratio; **MD:** Mean difference; * Unless otherwise stated, all studies are included in the pooled estimate.

#### *Explanations*

a. Serious risk of bias. High risk of performance bias. Reporting bias was an issue in one study (incomplete reporting of data such that it could not be included in the meta-analysis; results were reported narratively).

b. Serious indirectness. Exercise-only interventions and exercise + co-interventions were combined for analysis.

c. Serious risk of bias. High risk of performance bias and attrition bias. Unclear risk of selection bias; it was unclear if sequence generation and allocation concealment were adequate.

d. Serious imprecision. The 95% CI crosses the line of no effect, and is wide, such that the interpretation of the data would be different if the true effect were at one end of the CI or the other.

e. Serious indirectness. Exercise was combined with a co-intervention.

f. Serious risk of bias. High risk of performance bias. Unclear risk of selection bias; it was unclear if allocation concealment was adequate.

g. Serious risk of bias. High risk of attrition bias. Unclear risk of selection bias; it was unclear if sequence generation was adequate.

h. Serious inconsistency. Only one study was included.

i. No serious imprecision; only one study but already downgraded for serious inconsistency for this reason.

j. Non-randomized intervention

k. Serious risk of bias. High risk of performance and attrition bias. This study has no control group such that it could not be included in the meta-analysis; results were reported narratively.

l. Cohort study

m. Serious risk of bias. High risk of performance bias (potentially flawed measurement of the exposure; unknown validity of physical activity measure).

n. Cross-sectional study

o. Serious risk of bias. High risk of performance bias.

p. Case-control study

Online Supplement Table 5: The association between prenatal exercise and postnatal anxiety symptoms and anxiety.

| **Quality assessment** | | | | | | | **№ of participants** | | **Effect** | | **Quality** | **Importance** |
| --- | --- | --- | --- | --- | --- | --- | --- | --- | --- | --- | --- | --- |
| **№ of studies** | **Study design** | **Risk of bias** | **Inconsistency** | **Indirectness** | **Imprecision** | **Other considerations** | **prenatal exercise** | **no exercise** | **Relative (95% CI)** | **Absolute (95% CI)** |
| Association between prenatal exercise (exercise-only interventions and exercise + co-interventions) and postnatal State anxiety symptoms | | | | | | | | | | | | |
| 2 | randomized trials | serious a | not serious | serious b | serious c | none | 635 | 664 | - | SMD **0.01 higher** (0.1 lower to 0.12 higher) | ⨁◯◯◯ VERY LOW | CRITICAL |
| Sensitivity analysis: Association between exercise-only interventions and postnatal State anxiety symptoms | | | | | | | | | | | | |
| 1 | randomized trials | serious d | serious e | not serious | not serious f | none | 39 | 40 | - | SMD **0.01 higher** (0.43 lower to 0.45 higher) | ⨁⨁◯◯ LOW | CRITICAL |
| Sensitivity analysis: Association between exercise + co-interventions and postnatal State anxiety symptoms | | | | | | | | | | | | |
| 1 | randomized trials | serious a | serious e | serious b | not serious f | none | 596 | 624 | - | SMD **0.01 higher** (0.1 lower to 0.12 higher) | ⨁◯◯◯ VERY LOW | CRITICAL |
| Association between exercise + co-interventions and postnatal State anxiety | | | | | | | | | | | | |
| 1 | randomized trials | serious a | serious e | serious b | not serious f | none | 83/596 (13.9%) | 70/624 (11.2%) | OR 1.28 (0.91 to 1.80) | **27 more per 1 000** (from 9 fewer to 73 more) | ⨁◯◯◯ VERY LOW | CRITICAL |

**CI:** Confidence interval; **SMD:** Standardised mean difference; **OR:** Odds ratio

#### *Explanations*

a. Serious risk of bias. High risk of performance bias.

b. Serious indirectness. Exercise-only interventions and exercise + co-interventions were combined for analysis.

c. Serious imprecision. The 95% CI crosses the line of no effect, and is wide, such that the interpretation of the data would be different if the true effect were at one end of the CI or the other.

d. Serious risk of bias. High risk of performance and attrition bias. Unclear risk of selection bias; it was unclear if allocation concealment was adequate.

e. Serious inconsistency. Only one study was included.

f. No serious imprecision; only one study but already downgraded for serious inconsistency for this reason.

**3) Supplementary Figures**

**PRENATAL DEPRESSIVE SYMPTOMS**

**
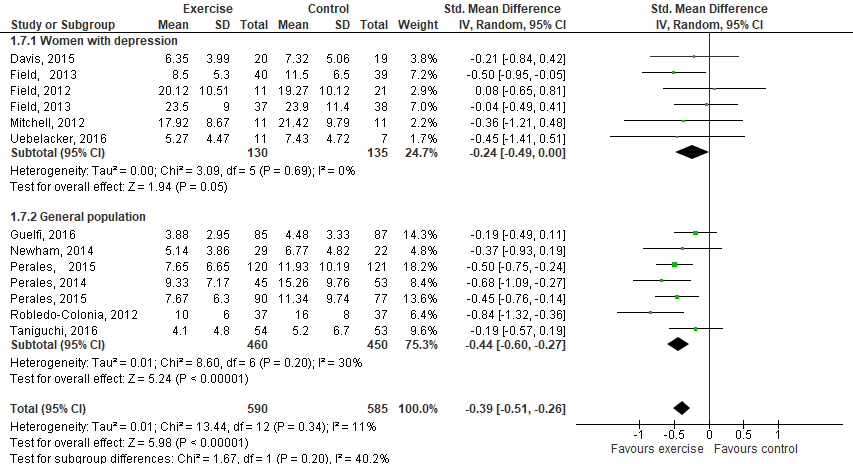
**

Online Supplement Figure 1: Effects of prenatal exercise-only interventions compared with control on prenatal depressive symptoms (randomized controlled trials). Subgroup analyses were conducted with studies including women with depression prior to the intervention with women who were not exclusively diagnosed with depression (defined as “general population”). Analyses conducted with a random effects model. CI, confidence interval; df, degrees of freedom; IV, inverse variance; SD, standard deviation.

**
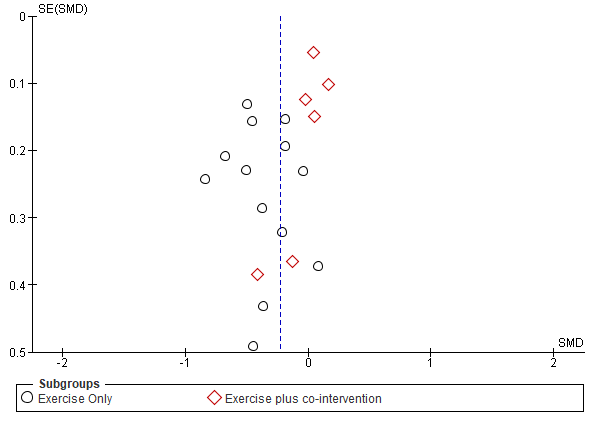
**

Online Supplement Figure 2: Funnel plot of the meta-analysis of published prenatal exercise-only and exercise+co-interventions on prenatal depressive symptoms (RCTs). Each plotted point represents the standard error and standard mean difference between intervention and control group for a single study. The vertical line represents the overall standard mean difference of -0.23 found in the meta-analysis.

**
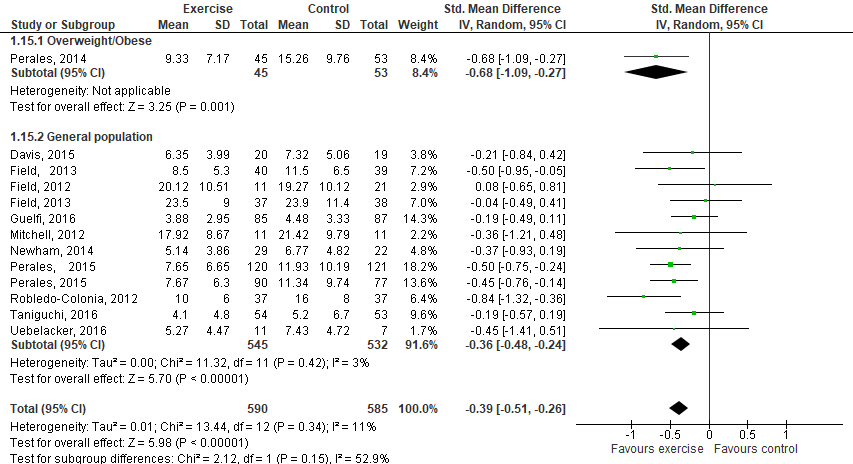
**

Online Supplement Figure 3: Effects of prenatal exercise-only interventions compared with control on prenatal depressive symptoms (randomized controlled trials). Subgroup analyses were conducted with studies including women of all body weight status (defined as “general population”) and with those including women with overweight or obesity. Analyses conducted with a random effects model. CI, confidence interval; df, degrees of freedom; IV, inverse variance; SD, standard deviation.

**
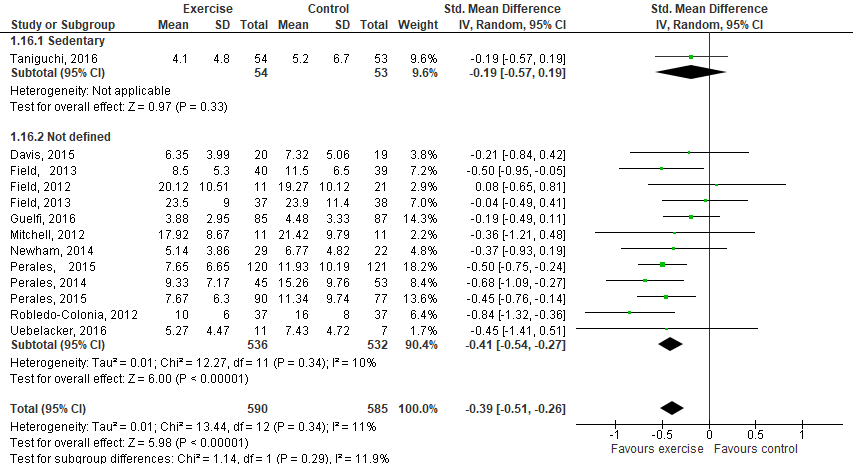
**

Online Supplement Figure 4: Effects of prenatal exercise-only interventions compared with control on prenatal depressive symptoms (randomized controlled trials). Subgroup analyses were conducted with studies not specifying previous physical activity levels of the women and with those including women who were previously inactive. Analyses conducted with a random effects model. CI, confidence interval; df, degrees of freedom; IV, inverse variance; SD, standard deviation.

**
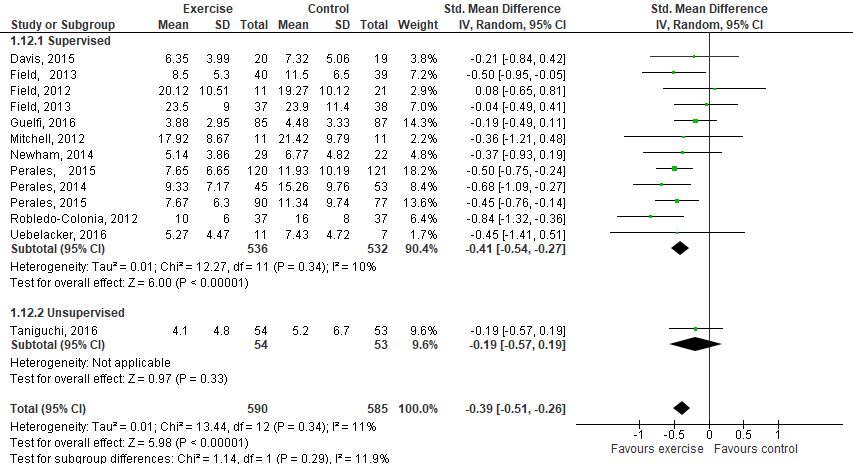
**

Online Supplement Figure 5: Effects of prenatal exercise-only interventions compared with control on prenatal depressive symptoms (randomized controlled trials). Subgroup analyses were conducted with studies utilizing supervised with unsupervised exercise. Analyses conducted with a random effects model. CI, confidence interval; df, degrees of freedom; IV, inverse variance; SD, standard deviation.

**
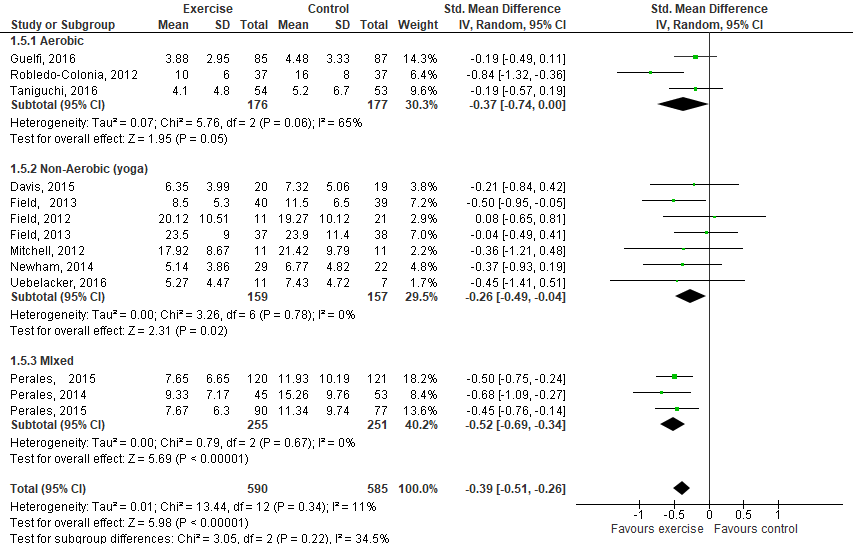
**

Online Supplement Figure 6: Effects of prenatal exercise-only interventions compared with control on prenatal depressive symptoms (randomized controlled trials). Subgroup analyses were conducted with studies including aerobic exercise, yoga exercise and mixed interventions. Analyses conducted with a random effects model. CI, confidence interval; df, degrees of freedom; IV, inverse variance; SD, standard deviation.

**
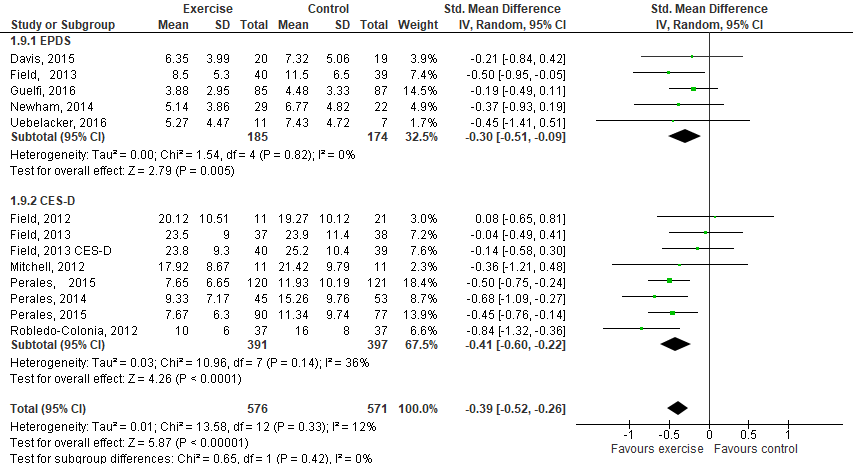
**

Online Supplement Figure 7: Effects of prenatal exercise-only interventions compared with control on prenatal depressive symptoms (randomized controlled trials). Subgroup analyses were conducted with studies utilizing the Edinburgh Postnatal Depression Questionnaire (EPDS) with the Center for Epidemiological Studies-Depression (CES-D). Analyses conducted with a random effects model. CI, confidence interval; df, degrees of freedom; IV, inverse variance; SD, standard deviation.

**
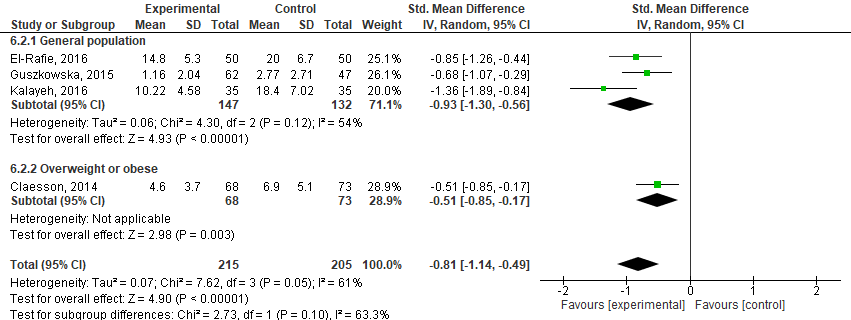
**

Online Supplement Figure 8: Effects of prenatal exercise-only interventions compared with control on prenatal depressive symptoms (non-randomized interventions). Subgroup analyses were conducted with studies including women of all body weight status (defined as “general population”) and with those including women with overweight or obesity. Analyses conducted with a random effects model. CI, confidence interval; df, degrees of freedom; IV, inverse variance; SD, standard deviation.

**
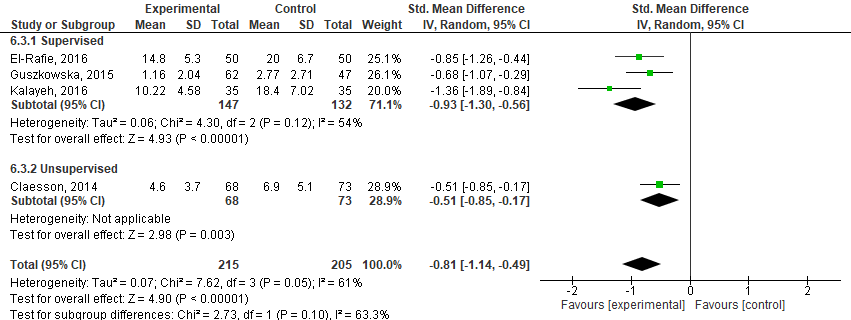
**

Online Supplement Figure 9: Effects of prenatal exercise-only interventions compared with control on prenatal depressive symptoms (non-randomized interventions). Subgroup analyses were conducted with studies including supervised with unsupervised exercise. Analyses conducted with a random effectss model. CI, confidence interval; df, degrees of freedom; IV, inverse variance; SD, standard deviation.

**
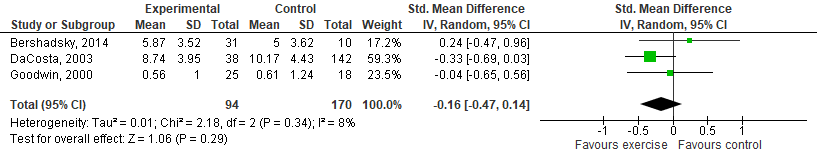
**

Online Supplement Figure 10: Effects of prenatal exercise compared with control on prenatal depressive symptoms (cohort studies). Analyses conducted with a random effects model. CI, confidence interval; df, degrees of freedom; IV, inverse variance; SD, standard deviation.

**
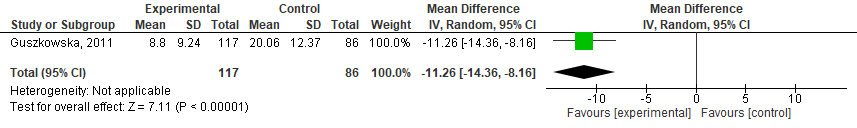
**

Online Supplement Figure 11: Effects of prenatal exercise compared with control on prenatal depressive symptoms (cross-sectional). Analyses conducted with a random effects model. CI, confidence interval; df, degrees of freedom; IV, inverse variance; SD, standard deviation.

**
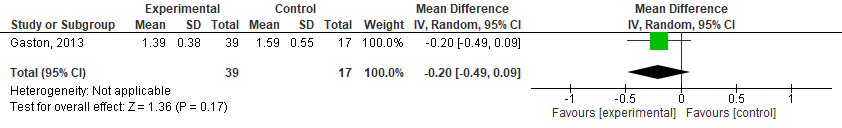
**

Online Supplement Figure 12: Effects of prenatal exercise compared with control on prenatal depressive symptoms (case control). Analyses conducted with a random effects model. CI, confidence interval; df, degrees of freedom; IV, inverse variance; SD, standard deviation.

**PRENATAL DEPRESSION OUTCOMES**


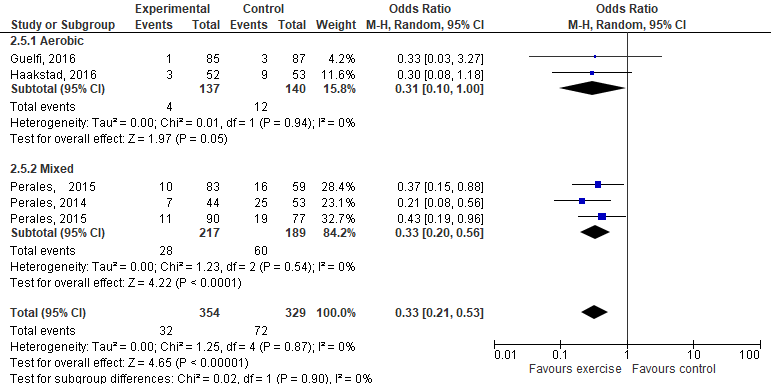


Online Supplement Figure 13: Effects of prenatal exercise-only interventions compared with control on prenatal depression (randomized controlled trials). Studies were stratified by type of exercise. Analyses conducted with a random effects model. CI, confidence interval; df, degrees of freedom; M-H, Mantel-Haenszel method; SD, standard deviation.

**
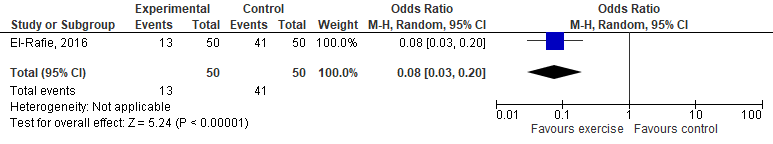
**

Online Supplement Figure 14: Effects of prenatal exercise-only interventions compared with control on prenatal depression (non-randomized intervention). Analyses conducted with a random effects model. CI, confidence interval; df, degrees of freedom; M-H, Mantel-Haenszel method; SD, standard deviation.

**
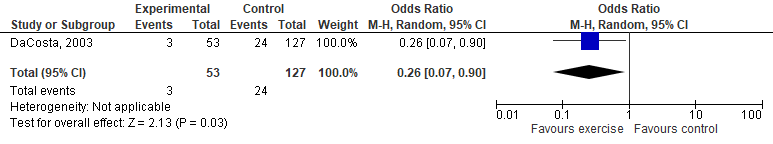
**

Online Supplement Figure 15: Effects of prenatal exercise compared with control on prenatal depression (cohort studies). Analyses conducted with a random effects model. CI, confidence interval; df, degrees of freedom; M-H, Mantel-Haenszel method; SD, standard deviation.

**POSTNATAL DEPRESSIVE SYMPTOMS**


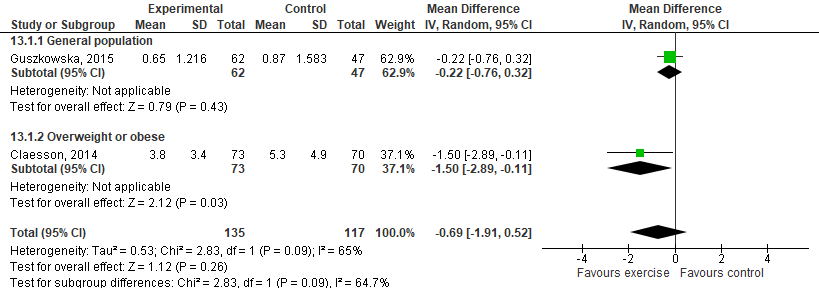


Online Supplement Figure 16: Effects of prenatal exercise compared with control on postnatal depressive symptoms (non-randomized interventions). Subgroup analyses were conducted with studies including women with overweight or obesity compared to women of any body mass index (defined as “general population”). Analyses conducted with a random effects model. CI, confidence interval; df, degrees of freedom; IV, inverse variance; SD, standard deviation


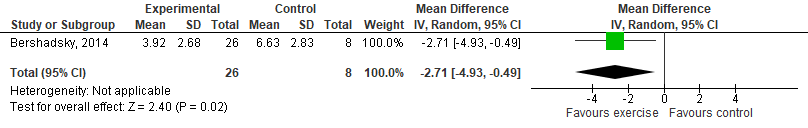


Online Supplement Figure 17: Effects of prenatal exercise on postnatal depressive symptoms (cohort studies). Analyses conducted with a random effects model. CI, confidence interval; df, degrees of freedom; IV, inverse variance; SD, standard deviation.

**POSTNATAL DEPRESSION**


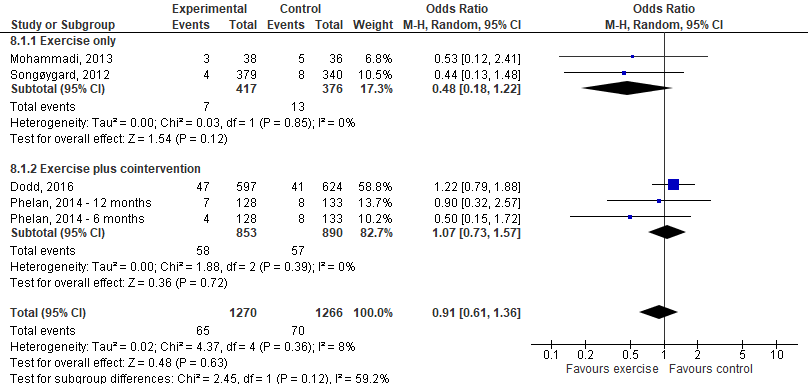


Online Supplement Figure 18: Effects of prenatal exercise-only versus exercise plus co-intervention compared to control on postnatal depression (randomized controlled trials). Analyses conducted with a random effects model. CI, confidence interval; df, degrees of freedom; IV, inverse variance; SD, standard deviation.


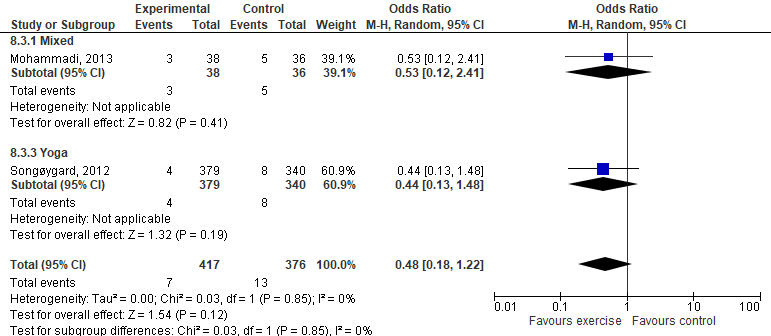


Online Supplement Figure 19: Effects of prenatal exercise-only compared to control on postnatal depression (randomized controlled trials). Studies were stratified by type of exercise. Analyses conducted with a random effects model. CI, confidence interval; df, degrees of freedom; IV, inverse variance; SD, standard deviation.


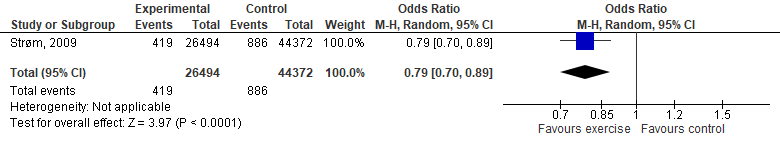


Online Supplement Figure 20: Effects of prenatal exercise compared to control on postnatal depression (cohort). Analyses conducted with a random effects model. CI, confidence interval; df, degrees of freedom; IV, inverse variance; SD, standard deviation.

**PRENATAL STATE ANXIETY SYMPTOMS**


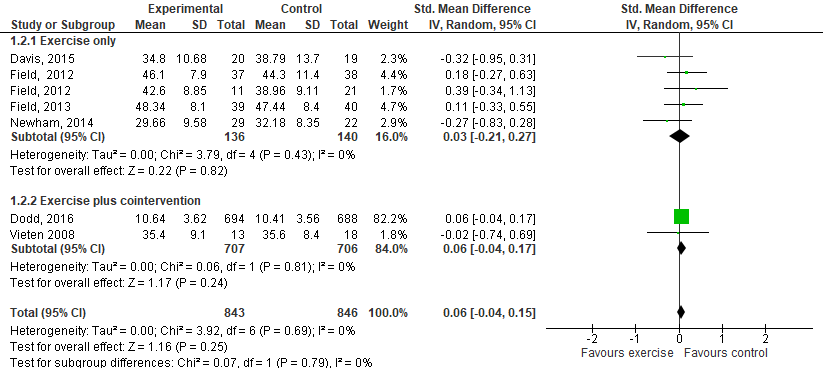


Online Supplement Figure 21: Effects of prenatal exercise-only versus exercise plus co-intervention compared to control on prenatal state anxiety symptoms (randomized controlled trials). Analyses conducted with a random effects model. CI, confidence interval; df, degrees of freedom; IV, inverse variance; SD, standard deviation

**PRENATAL STATE ANXIETY**


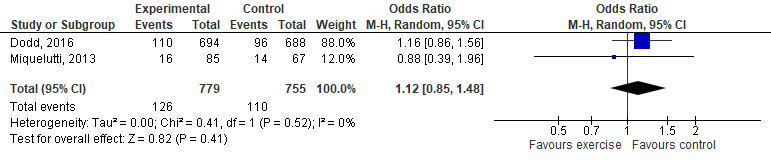


Online Supplement Figure 22: Effects of prenatal exercise plus co-interventions compared to control on prenatal state anxiety (randomized controlled trials). Analyses conducted with a random effects model. CI, confidence interval; df, degrees of freedom; IV, inverse variance; SD, standard deviation

**PRENATAL STATE ANXIETY SYMPTOMS**


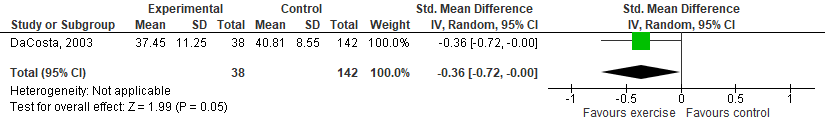


Online Supplement Figure 23: Effects of prenatal exercise compared to control on prenatal state anxiety (cohort studies). Analyses conducted with a random effects model. CI, confidence interval; df, degrees of freedom; IV, inverse variance; SD, standard deviation


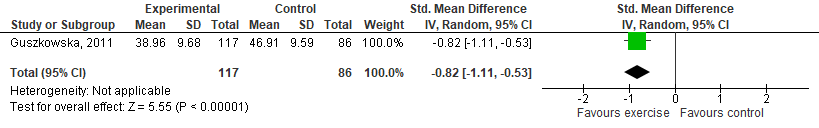


Online Supplement Figure 24: Effects of prenatal exercise compared to control on prenatal state anxiety (cross-sectional studies. Analyses conducted with a random effects model. CI, confidence interval; df, degrees of freedom; IV, inverse variance; SD, standard deviation

**PRENATAL TRAIT ANXIETY SYMPTOMS**


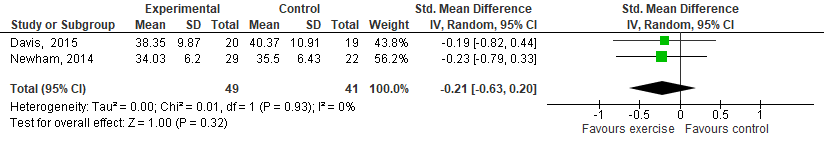


Online Supplement Figure 25: Effects of prenatal exercise-only interventions compared to control on prenatal trait anxiety symptoms (randomized controlled trials). Analyses conducted with a random effects model. CI, confidence interval; df, degrees of freedom; IV, inverse variance; SD, standard deviation.


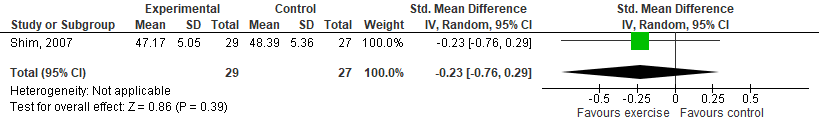


Online Supplement Figure 26: Effects of prenatal exercise interventions compared to control on prenatal trait anxiety symptoms (non-randomized interventions). Analyses conducted with a random effects model. CI, confidence interval; df, degrees of freedom; IV, inverse variance; SD, standard deviation


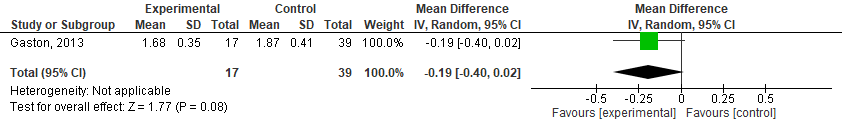


Online Supplement Figure 27: Effects of prenatal exercise compared to control on prenatal trait anxiety symptoms (case control). Analyses conducted with a random effects model. CI, confidence interval; df, degrees of freedom; IV, inverse variance; SD, standard deviation


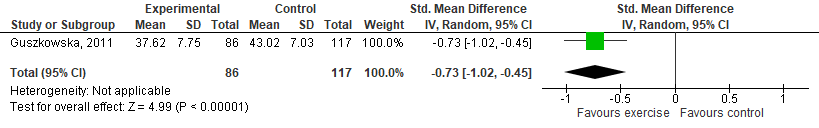


Online Supplement Figure 28: Effects of prenatal exercise compared to control on prenatal trait anxiety symptoms (cross-sectional). Analyses conducted with a random effects model. CI, confidence interval; df, degrees of freedom; IV, inverse variance; SD, standard deviation

**PRENATAL TRAIT ANXIETY**


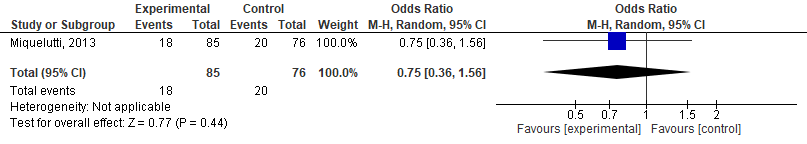


Online Supplement Figure 29: Effects of prenatal exercise plus co-intervention compared with control on prenatal trait anxiety (randomized controlled trial). Analyses conducted with a random effects model. CI, confidence interval; df, degrees of freedom; IV, inverse variance; SD, standard deviation.

**POSTPARTUM STATE ANXIETY SYMPTOMS**


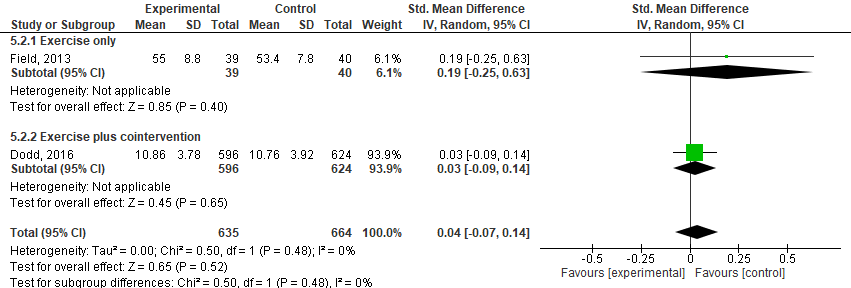


Online Supplement Figure 30: Effects of prenatal exercise versus exercise plus co-intervention compared with control on postnatal state anxiety symptoms (randomized controlled trials). Analyses conducted with a random effects model. CI, confidence interval; df, degrees of freedom; IV, inverse variance; SD, standard deviation.

**POSTPARTUM STATE ANXIETY**


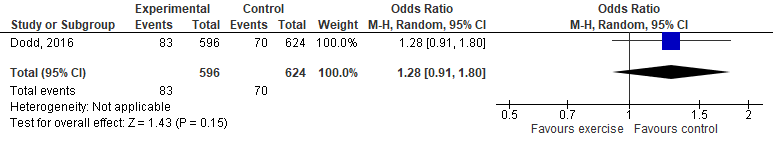


Online Supplement Figure 31: Effects of prenatal exercise plus co-intervention compared with control on postnatal state anxiety (randomized controlled trials). Analyses conducted with a random effects model. CI, confidence interval; df, degrees of freedom; M-H, Mantel-Haenszel method; SD, standard deviation.

Online Supplement Figure 32: Linear and Spline regression of prenatal exercise-only randomized controlled trials examining the intensity of exercise (METS/minute) on severity of prenatal depressive symptoms. Black line, line of best fit; red line, standard mean difference of 0; blue line, standard mean difference of -0.4 (moderate effect size). Circle size is related to the weight of the study in the regression.

Online Supplement Figure 33: Linear and Spline regression of prenatal exercise-only randomized controlled trials examining the duration of exercise (minutes) on severity of prenatal depressive symptoms. Black line, line of best fit; red line, standard mean difference of 0; blue line, standard mean difference of -0.4 (moderate effect size). Circle size is related to the weight of the study in the regression.

Online Supplement Figure 34: Linear and Spline regression of prenatal exercise-only randomized controlled trials examining the frequency of exercise per week on severity of prenatal depressive symptoms. Black line, line of best fit; red line, standard mean difference of 0; blue line, standard mean difference of -0.4 (moderate effect size). Circle size is related to the weight of the study in the regression.

Online Supplement Figure 35: Linear and Spline regression of prenatal exercise-only randomized controlled trials examining the volume of exercise per week (MET minutes per week) on severity of prenatal depressive symptoms. Black line, line of best fit; red line, standard mean difference of 0; blue line, standard mean difference of -0.4 (moderate effect size). Circle size is related to the weight of the study in the regression.

**4) Search strategies**

The following databases were searched on January 6th, 2017:

- Ovid MEDLINE(R) In-Process & Other Non-Indexed Citations, Ovid MEDLINE(R) Daily and Ovid MEDLINE(R)
- Ovid EMBASE
- Ovid All EBM [Evidence-Based Medicine] Reviews: Cochrane Database of Systematic and Cochrane Central Register of Controlled Trials
- Ovid PsycInfo 1806-Present
- EBSCO CINAHL Plus with Full-text, 1937-Present
- EBSCO Sport Discus with Full-text. 1975-Present
- EBSCO ERIC, 1966-Present
- EBSCO Child Development and Adolescent Studies, 1927-Present
- Scopus, 1960-Present
- Web of Science Core Collection (including Emerging Sources Citation Index), 1900-Present
- Clinicaltrials.gov

*Maternal Outcomes Strategy*

MEDLINE

1. exp Exercise/ or Athletes/ or exp Exercise Movement Techniques/ or Physical Exertion/ or exp Exercise Therapy/ or exp Sports/ or Motor Activity/ or Sedentary Lifestyle/ or (exercise or physical* activ* or strenuous activit* or physical* inactiv* or sedentary or running or plyometric* or yoga or tai chi or weight training or resistance training or swim* or sport* or athlet* or walk or walking or mvpa or ltpa or stretching or aerobic capacity).ti,kf. or exercise.ab. /freq=2 or physical* activ*.ab. /freq=2 or (weight* adj2 lift*).ti,kf. or ((muscle or muscular or strength*) adj2 conditioning).ti,kf.

2. exp Pregnancy Complications/ or Pregnancy Outcome/ or exp Labor, Obstetric/ or exp Delivery, Obstetric/ or exp Extraction, Obstetrical/ or pregnan*.ti,hw,kf.

3. ((birth or pregnancy or childbirth) adj3 (outcome* or complication*)).mp.

4. (((spontaneous or induc* or onset or length) adj3 (labor or labour)) or cesarean).mp.

5. (episiotom* or vaginal delivery or gestational diabetes or pre-eclampsia or preeclampsia or gestosis).mp.

6. (((normal or instrumental or assisted) adj2 (delivery or birth or childbirth)) or (forceps or ventouse or vacuum extraction)).mp.

7. ((mode of delivery or type of delivery) and (pregnan* or birth or childbirth or obstetric* or labor or labour)).mp.

8. ((tear* or ruptur* or hemorrhage*) adj2 (placent* or vagin* or membran* or periton*)).mp.

9. (miscarriage* or spontaneous abortion*).mp.

10. or/2-9

11. 1 and 10

12. Pregnancy/ or pregnan*.ti,hw,kf. or exp Pregnancy Trimesters/ or Peripartum Period/ or Postpartum Period/ or (antenatal or prenatal or perinatal or postnatal or prepartum or antepartum or postpartum or pre partum or ante partum or post partum or puerper* or primigravid* or primiparous or multiparous or nulliparous or multigravid* or trimester* or obstetric*).ti,kf.

13. 1 and 12

14. ((pregnan* or antenatal or prenatal or perinatal or postnatal or prepartum or antepartum or postpartum or pre partum or ante partum or post-partum or puerper*) adj5 (exercise or physical* activ* or strenuous activit* or physical inactiv* or sedentary or running or plyometric* or yoga or tai chi or weight training or resistance training or (weight* adj2 lift*) or swim* or sport* or athlet* or walk or walking or ((muscle or muscular or strength*) adj2 conditioning))).ab.

15. 13 or 14

16. exp Insulins/ or diabetes mellitus/ or exp diabetes mellitus, type 1/ or exp diabetes mellitus, type 2/ or diabetes, gestational/ or prediabetic state/ or hemoglobin a, glycosylated/ or (insulin or glucose or glycemic control or blood sugar or diabet* or prediabet* or hba1c or glycosylated hemoglobin or hyperglycemi* or hypoglycemi* or (weight adj3 (gain* or change* or loss or lose or retention)) or bmi or body mass index or body composition or skinfold thickness or ((hip or waist) adj2 ratio) or ((waist or abdominal) adj2 circumference) or overweight or obes* or adipos* or underweight or normal weight or healthy weight or hypertension or hypotension or fainting or syncope or lightheaded* or light headed* or dizziness or blood pressure or toxemi* or eph complex or proteinuria or edema or hemodynamic* or haemodynamic* or systolic or diastolic or cardiovascular or cardiometabolic or cardio-metabolic or metabolic or heart or cardio* or cardiac or lipid* or placental growth factor* or triglyceride* or ldl or hdl or lipoprotein or cholesterol).mp.

17. dehydration/ or exp Cardiovascular Diseases/ or (dehydrat* or heart disease* or cardiovascular disease*).mp.

18. adaptation, physiological/ or body temperature regulation/

19. Physical Fitness/ or exp Physical Endurance/ or me.fs. or (safe* or harm* or risk* or fitness or aerobic capacity or oxygen consumption or vo2 max or vo2max or vo2 peak or vo2peak or frequency or intensity or duration or dose response or fitt or zone or (type* adj2 exercise)).mp.

20. exp Chronic disease/ or exp Osteoporosis/ or exp Urinary Incontinence/ or (chronic disease* or chronic illness* or osteoporosis or incontinen*).mp.

21. exp Back Pain/ or Pelvic Pain/ or Muscle Cramp/ or (Pain/ and exp Hip Joint/) or ((hip or back or pelvic or pelvis) adj3 (pain or discomfort or ache)).mp. or cramp*.mp.

22. Mental Health/ or exp Mental Disorders/ or Body Image/ or Self Concept/ or (mental health or mental disorder* or mental illness* or mental disease* or depression or depressive or mood or anxiety or well-being or wellbeing or wellness or body image or self perception).mp.

23. (postur* or supine or valsalva or diastasis recti or rectus abdominis or inter rectus distance or interrectus distance).mp.

24. Fatigue/ or (fatigue or exhaustion or injur* or trauma).mp.

25. or/16-24

26. 15 and 25

27. 11 or 26

28. limit 27 to medline

29. animals/ not (animals/ and humans/)

30. 28 not 29

31. 27 not 28

32. ((rat or rats or mouse or mice or cow or cows or bovine or sheep or ewe*) not ((rat or rats or mouse or mice or cow or cows or bovine or sheep or ewe*) and (human* or women))).ti,ab,kf.

33. 31 not 32

34. 30 or 33

35. remove duplicates from 34

EMBASE

1. exp *exercise/ or *athlete/ or exp *kinesiotherapy/ or exp *sport/ or exp *physical activity/ or *sedentary lifestyle/ or (exercise or physical* activ* or physical* inactiv* or sedentary or running or plyometric* or yoga or tai chi or weight training or resistance training or swim* or sport* or athlet* or walk or walking or mvpa or ltpa or stretching or aerobic capacity).ti,kw. or exercise.ab. /freq=2 or physical* activ*.ab. /freq=2 or (weight* adj2 lift*).ti,kw. or ((muscle or muscular or strength*) adj2 conditioning).ti,kw.

2. exp pregnancy complication/ or pregnancy outcome/ or exp labor/ or exp delivery/ or pregnan*.ti,kw.

3. ((birth or pregnancy or childbirth) adj3 (outcome* or complication*)).mp.

4. (((spontaneous or induc* or onset or length) adj3 (labor or labour)) or cesarean).mp.

5. (episiotom* or vaginal delivery or gestational diabetes or pre-eclampsia or preeclampsia or gestosis).mp.

6. (((normal or instrumental or assisted) adj2 (delivery or birth or childbirth)) or (forceps or ventouse or vacuum extraction)).mp.

7. ((mode of delivery or type of delivery) and (pregnan* or birth or childbirth or obstetric* or labor or labour)).mp.

8. ((tear* or ruptur* or hemorrhage*) adj2 (placent* or vagin* or membran* or periton*)).mp.

9. (miscarriage* or spontaneous abortion*).mp.

10. or/2-9

11. 1 and 10

12. Pregnancy/ or pregnan*.ti,hw,kw. or exp Pregnancy Trimesters/ or Peripartum Period/ or Postpartum Period/ or (antenatal or prenatal or perinatal or postnatal or prepartum or antepartum or postpartum or pre partum or ante partum or post-partum or puerper* or primigravid* or primiparous or multiparous or nulliparous or multigravid* or trimester* or obstetric*).ti,kw.

13. 1 and 12

14. ((pregnan* or maternal or antenatal or prenatal or perinatal or postnatal or prepartum or antepartum or postpartum or pre partum or ante partum or post-partum or puerper*) adj5 (exercise or physical* activ* or strenuous activit* or physical* inactiv* or sedentary or running or plyometric* or yoga or tai chi or weight training or resistance training or (weight* adj2 lift*) or swim* or sport* or athlet* or walk or walking or mvpa or ltpa or stretching or aerobic capacity or fitness or ((muscle or muscular or strength*) adj2 conditioning))).ab.

15. 13 or 14

16. exp insulin/ or exp diabetes mellitus/ or glycosylated hemoglobin/ or (insulin or glucose or glycemic control or blood sugar or diabet* or prediabet* or hba1c or glycosylated hemoglobin or hyperglycemic* or hypoglycemi* or (weight adj3 (gain* or change* or loss or lose or retention)) or bmi or body mass index or body composition or skinfold thickness or ((hip or waist) adj2 ratio) or ((waist or abdominal) adj2 circumference) or overweight or obes* or adipos* or underweight or normal weight or healthy weight or hypertension or hypotension or fainting or syncope or lightheaded* or light headed* or dizziness or blood pressure or toxemi* or eph complex or proteinuria or edema or hemodynamic* or haemodynamic* or systolic or diastolic or cardiovascular or cardiometabolic or cardio-metabolic or metabolic or heart or cardio* or cardiac or lipid* or placental growth factor* or triglyceride* or ldl or hdl or lipoprotein or cholesterol).mp.

17. dehydration/ or exp cardiovascular disease/ or (dehydrat* or heart disease* or cardiovascular disease*).mp.

18. adaptation/ or exp thermoregulation/ or fitness/ or endurance/ or (safe* or harm* or risk* or fitness or aerobic capacity or oxygen consumption or vo2 max or vo2max or vo2 peak or vo2peak or frequency or intensity or duration or dose response or fitt or zone or (type* adj2 exercise)).mp.

19. exp backache/ or exp pelvic pain/ or hip pain/ or muscle cramp/ or heat cramp/ or leg cramp/ or ((hip or back or pelvic or pelvis) adj3 (pain or discomfort or ache)).mp. or cramp*.mp.

20. mental health/ or psychological well-being/ or exp mental disease/ or body image/ or self concept/ or (mental health or mental disorder* or mental illness* or mental disease* or depression or depressive or mood or anxiety or well being or wellbeing or wellness or body image or self perception).mp.

21. (postur* or supine or valsalva or diastasis recti or rectus abdominis or inter rectus distance or interrectus distance).mp.

22. fatigue/ or exhaustion/ or (fatigue or exhaustion or injur* or trauma or blood loss).mp.

23. chronic disease/ or exp osteoporosis/ or exp urine incontinence/ or (chronic disease* or chronic illness* or osteoporosis or incontinen*).mp.

24. or/16-23

25. 15 and 24

26. 11 or 25

27. exp animal/ not (exp animal/ and human/)

28. 26 not 27

29. remove duplicates from 28

PsycInfo

1. physical activity/ or exp exercise/ or activity level/ or athletes/ or exp sports/ or ((exercise or physical* activ* or strenuous activit* or physical* inactiv* or sedentary or running or plyometric* or yoga or tai chi or weight training or resistance training or swim* or sport* or athlet* or walk or walking or mvpa or ltpa or stretching or aerobic capacity).ti,ab,id. or ((weight* adj2 lift*) or ((muscle or muscular or strength*) adj2 conditioning))).ti,ab,id.

2. obstetrical complications/ or pregnancy outcomes/ or spontaneous abortion/ or "labor (childbirth)"/ or birth/

3. (pregnan* or ((birth or pregnancy or childbirth) adj3 (outcome* or complication*))).mp.

4. (((spontaneous or induc* or onset or length) adj3 (labor or labour)) or cesarean).mp.

5. (episiotom* or vaginal delivery or gestational diabetes or pre-eclampsia or preeclampsia or gestosis).mp.

6. (((normal or instrumental or assisted) adj2 (delivery or birth or childbirth)) or (forceps or ventouse or vacuum extraction)).mp.

7. ((mode of delivery or type of delivery) and (pregnan* or birth or childbirth or obstetric* or labor or labour)).mp.

8. ((tear* or ruptur* or hemorrhage*) adj2 (placent* or vagin* or membran* or periton*)).mp.

9. (miscarriage* or spontaneous abortion*).mp.

10. or/2-9

11. 1 and 10

12. exp pregnancy/ or pregnan*.ti,hw,id. or (antenatal or prenatal or perinatal or postnatal or prepartum or antepartum or postpartum or primigravid* or primiparous or multiparous or nulliparous or multigravid* or trimester* or obstetric*).ti,id.

13. 1 and 12

14. ((pregnan* or antenatal or prenatal or perinatal or postnatal or prepartum or antepartum or postpartum or pre partum or ante partum or post partum or puerper*) adj5 (exercise or physical* activ* or strenuous activit* or physical inactiv* or sedentary or running or plyometric* or yoga or tai chi or weight training or resistance training or (weight* adj2 lift*) or swim* or sport* or athlet* or walk or walking or ((muscle or muscular or strength*) adj2 conditioning))).ab.

15. 13 or 14

16. insulin/ or diabetes/ or diabetes mellitus/ or (insulin or glucose or glycemic control or blood sugar or diabet* or prediabet* or hba1c or glycosylated hemoglobin or hyperglycemi* or hypoglycemi* or (weight adj3 (gain* or change* or loss or lose or retention)) or bmi or body mass index or body composition or skinfold thickness or ((hip or waist) adj2 ratio) or ((waist or abdominal) adj2 circumference) or overweight or obes* or adipos* or underweight or normal weight or healthy weight or hypertension or hypotension or fainting or syncope or lightheaded* or light headed* or dizziness or blood pressure or toxemi* or eph complex or proteinuria or edema or hemodynamic* or haemodynamic* or systolic or diastolic or cardiovascular or cardiometabolic or cardio-metabolic or metabolic or heart or cardio* or cardiac or lipid* or placental growth factor* or triglyceride* or ldl or hdl or lipoprotein or cholesterol).mp.

17. dehydration/ or exp Cardiovascular Disorders/ or (dehydrat* or heart disease* or cardiovascular disease*).mp.

18. "thermoregulation (body)"/ or physical fitness/ or physical endurance/ or (safe* or harm* or risk* or fitness or aerobic capacity or oxygen consumption or vo2 max or vo2max or vo2 peak or vo2peak or frequency or intensity or duration or dose response or fitt or zone or (type* adj2 exercise)).mp.

19. back pain/ or ((hip or back or pelvic or pelvis) adj3 (pain or discomfort or ache)).mp. or cramp*.mp.

20. mental health/ or exp Mental Disorders/ or exp body image/ or self concept/ or (mental health or mental disorder* or mental illness* or mental disease* or depression or depressive or mood or anxiety or well being or wellbeing or wellness or body image or self perception).mp.

21. (postur* or supine or valsalva or diastasis recti or rectus abdominis or inter rectus distance or interrectus distance).mp.

22. fatigue/ or (fatigue or exhaustion or injur* or trauma).mp.

23. Physical Fitness/ or exp Physical Endurance/ or (safe* or harm* or risk* or fitness or aerobic capacity or oxygen consumption or vo2 max or vo2max or vo2 peak or vo2peak or frequency or intensity or duration or dose response or fitt or zone or (type* adj2 exercise)).mp.

24. chronic illness/ or osteoporosis/ or urinary incontinence/ or (chronic disease* or chronic illness* or osteoporosis or incontinen*).mp.

25. or/16-24

26. 15 and 25

27. 11 or 26

28. first posting.ps.

29. (27 not first posting).ps.

30. limit 29 to human

31. 27 and 28

32. 30 or 31

CINAHL

S1 ( (MH "Exercise+") OR (MH "Athletes+") OR (MH "Therapeutic Exercise+") OR (MH "Physical Fitness+") OR (MH "Physical Activity") OR (MH "Physical Endurance+") OR (MH "Exertion+") OR (MH "Sports+") OR (MH "Life Style, Sedentary") OR (MH "Yoga+") OR (MH "Tai Chi") ) OR TI ( exercise or "physical* activ*" or "strenuous activit*" or "physical* inactiv*" or sedentary or running or plyometric* or yoga or "tai chi" or "weight training" or "resistance training" or swim* or sport* or athlet* or walk or walking or mvpa or ltpa or stretching or "aerobic capacity" or fitness or weight* n2 lift* or (muscle or muscular or strength*) n2 conditioning )

S2 ((MH "Pregnancy Complications+") OR (MH "Pregnancy Outcomes") OR (MH "Pregnancy Trimesters+") OR (MH "Labor+") OR (MH "Delivery, Obstetric+") OR (MH "Surgery, Obstetrical+")) OR TI pregnan* OR MW pregnan*

S3 (birth or pregnancy or childbirth) n3 (outcome* or complication*) or (spontaneous or induc* or onset or length) n3 (labor or labour) or cesarean or caesarean or episiotom* or "vaginal delivery" or "gestational diabetes" or "pre-eclampsia" or preeclampsia or gestosis OR (normal or instrumental or assisted) n2 (delivery or birth or childbirth) or forceps or ventouse or "vacuum extraction" or miscarriage* or "spontaneous abortion*" OR ( ("mode of delivery" or "type of delivery") and (pregnan* or birth or childbirth or obstetric* or labor or labour) ) OR (tear* or ruptur* or hemorrhage*) n2 (placent* or vagin* or membran* or periton*)

S4 S2 OR S3

S5 S1 AND S4

S6 ( (MH "Pregnancy") OR (MH "Pregnancy Trimesters+") ) OR TI ( pregnan* or trimester* or antenatal or prenatal or perinatal or postnatal or prepartum or antepartum or postpartum or "pre partum" or "ante partum" or "post partum" or puerper* or primigravid* or primiparous or multiparous or nulliparous or multigravid* ) OR MW ( antenatal or prenatal or perinatal or postnatal or prepartum or antepartum or postpartum or primigravid* or primiparous or multiparous or nulliparous or multigravid* or trimester* or obstetric* )

S7 S1 and S6

S8 (pregnan* or trimester* or antenatal or prenatal or perinatal or postnatal or prepartum or antepartum or postpartum or "pre partum" or "ante partum" or "post partum" or puerper*) n5 (exercise or "physical* activ*" or "strenuous activit*" or "physical* inactiv*" or sedentary or running or plyometric* or yoga or "tai chi" or "weight training" or "resistance training" or (weight* n2 lift*) or swim* or sport* or athlet* or walk or walking or (muscle or muscular or strength*) n2 conditioning)

S9 S7 or S8

S10 ((MH "Insulin+") OR (MH "Diabetes Mellitus+") OR (MH "Prediabetic State") OR (MH "Hemoglobin A, Glycosylated") ) OR ( insulin or glucose or "glycemic control" or "glycaemic control" or "blood sugar" or diabet* or prediabet* or hba1c or "glycosylated hemoglobin" or "glycosylated haemoglobin" or hyperglycemi* or hyperglycaemi* or hypoglycemi* or hypoglycaemi* or weight n3 (gain* or change* or loss or lose or retention) or bmi or "body mass index" or "body composition" or "skinfold thickness" or (hip or waist) n2 ratio or (waist or abdominal) n2 circumference or overweight or obes* or adipos* or underweight or "normal weight" or "healthy weight" or hypertension or hypotension or fainting or syncope or lightheaded* or "light headed*" or dizziness or "blood pressure" or toxemi* or toxaemi* or "eph complex" or proteinuria or edema or hemodynamic* or haemodynamic* or systolic or diastolic or cardiovascular or cardiometabolic or "cardio-metabolic" or metabolic or heart or cardio* or cardiac or lipid* or "placental growth factor*" or triglyceride* or ldl or hdl or lipoprotein or cholesterol )

S11 ((MH "Dehydration") OR (MH "Cardiovascular Diseases+") ) OR ( dehydrat* or heart disease* or "cardiovascular disease*" )

S12 ((MH "Adaptation, Physiological") OR (MH "Body Temperature Regulation+") OR (MH "Physical Fitness+") OR (MH "Physical Endurance+") ) OR MW metabolism OR ( safe* or harm* or risk* or fitness or "aerobic capacity" or "oxygen consumption" or "vo2 max" or vo2max or "vo2 peak" or vo2peak or frequency or intensity or duration or "dose response" or fitt or zone or type* n2 exercise )

S13 ((MH "Chronic Disease") OR (MH "Urinary Incontinence+") OR (MH "Osteoporosis+") ) OR ( "chronic disease*" or "chronic illness*" or osteoporosis or incontinen* )

S14 ((MH "Back Pain+") OR (MH "Pelvic Pain+") OR (MH "Muscle Cramp") ) OR ( cramp* or (hip or back or pelvic or pelvis) n3 (pain or discomfort or ache) )

S15 ((MH "Mental Health") OR (MH "Mental Disorders+") OR (MH "Psychological Well-Being") OR (MH "Body Image") OR (MH "Self Concept")) OR ( "mental health" or "mental disorder*" or "mental illness*" or "mental disease*" or depression or depressive or mood or anxiety or "well being" or wellbeing or wellness or "body image" or "self perception" )

S16 (MH "Fatigue") or fatigue or exhaustion or injur* or trauma

S17 postur* or supine or valsalva or "diastasis recti" or "rectus abdominis" or "inter rectus distance" or "interrectus distance"

S18 S10 OR S11 OR S12 OR S13 OR S14 OR S15 OR S16 OR S17

S19 S9 AND S18

S20 S5 OR S19

Sport Discus

S1 (birth or pregnancy or childbirth) n3 (outcome* or complication*) or (spontaneous or induc* or onset or length) n3 (labor or labour) or cesarean or caesarean or episiotom* or "vaginal delivery" or "gestational diabetes" or "pre-eclampsia" or preeclampsia or gestosis) OR (normal or instrumental or assisted) n2 (delivery or birth or childbirth) or forceps or ventouse or "vacuum extraction" or miscarriage* or "spontaneous abortion*" OR ( ("mode of delivery" or "type of delivery") and (pregnan* or birth or childbirth or obstetric* or labor or labour) ) OR (tear* or ruptur* or hemorrhage*) n2 (placent* or vagin* or membran* or periton*) OR antenatal or prenatal or perinatal or postnatal or prepartum or antepartum or postpartum or "pre partum" or "ante partum" or "post partum" or puerper* or primigravid* or primiparous or multiparous or nulliparous or multigravid* or pregnan* or trimester* or obstetric*

S2 exercise or "physical* activ*" or "strenuous activit*" or "physical* inactiv*" or sedentary or running or plyometric* or yoga or "tai chi" or "weight training" or "resistance training" or swim* or sport* or athlet* or walk or walking or mvpa or ltpa or stretching or "aerobic capacity" or fitness or weight* n2 lift* or (muscle or muscular or strength*) n2 conditioning

S3 S1 and S2

[Limited to Academic Journal, Dissertation, Report]

Child Development & Adolescent Studies

exercise or "physical* activ*" or "strenuous activit*" or "physical* inactiv*" or sedentary or running or plyometric* or yoga or "tai chi" or "weight training" or "resistance training" or swim* or sport* or athlet* or walk or walking or mvpa or ltpa or stretching or "aerobic capacity" or fitness or weight* n2 lift* or (muscle or muscular or strength*) n2 conditioning

AND

pregnan* or antenatal or prenatal or perinatal or postnatal or prepartum or antepartum or postpartum or primigravid* or primiparous or multiparous or nulliparous or multigravid* or or trimester* or obstetric* or ( (birth or pregnancy or childbirth) n3 (outcome* or complication*) or (spontaneous or induc* or onset or length) n3 (labor or labour) or cesarean or caesarean or episiotom* or "vaginal delivery" or "gestational diabetes" or "pre-eclampsia" or preeclampsia or gestosis OR (normal or instrumental or assisted) n2 (delivery or birth or childbirth) or forceps or ventouse or "vacuum extraction" or miscarriage* or "spontaneous abortion*" OR ( ("mode of delivery" or "type of delivery") and (pregnan* or birth or childbirth or obstetric* or labor or labour) ) OR ( (tear* or ruptur* or hemorrhage*) n2 (placent* or vagin* or membran* or periton*)

[Limited to Academic Journal]

ERIC

exercise or "physical* activ*" or "strenuous activit*" or "physical* inactiv*" or sedentary or running or plyometric* or yoga or "tai chi" or "weight training" or "resistance training" or swim* or sport* or athlet* or walk or walking or mvpa or ltpa or stretching or "aerobic capacity" or fitness or weight* n2 lift* or (muscle or muscular or strength*) n2 conditioning

AND

pregnan* or antenatal or prenatal or perinatal or postnatal or prepartum or antepartum or postpartum or primigravid* or primiparous or multiparous or nulliparous or multigravid* or trimester* or obstetric* or ( (birth or pregnancy or childbirth) n3 (outcome* or complication*) or (spontaneous or induc* or onset or length) n3 (labor or labour) or cesarean or caesarean or episiotom* or "vaginal delivery" or "gestational diabetes" or "pre-eclampsia" or preeclampsia or gestosis OR (normal or instrumental or assisted) n2 (delivery or birth or childbirth) or forceps or ventouse or "vacuum extraction" or miscarriage* or "spontaneous abortion*" OR ( ("mode of delivery" or "type of delivery") and (pregnan* or birth or childbirth or obstetric* or labor or labour) ) OR ( (tear* or ruptur* or hemorrhage*) n2 (placent* or vagin* or membran* or periton*)

[Limited to Academic Journals]

Scopus

(((TITLE-ABS-KEY(((birth or pregnancy or childbirth) w/3 (outcome* or complication*)) or ((spontaneous or induc* or onset or length) w/3 (labor or labour)) or cesarean or caesarean or episiotom* or "vaginal delivery" or "gestational diabetes" or "pre-eclampsia" or preeclampsia or gestosis OR ( (normal or instrumental or assisted) w/2 (delivery or birth or childbirth) or forceps or ventouse or "vacuum extraction" or miscarriage* or "spontaneous abortion*" ) OR (("mode of delivery" or "type of delivery") and (pregnan* or birth or childbirth or obstetric* or labor or labour) ) OR ( (tear* or ruptur* or hemorrhage*) w/2 (placent* or vagin* or membran* or periton*)) OR antenatal or prenatal or perinatal or postnatal or prepartum or antepartum or postpartum or "pre partum" or "ante partum" or "post partum" or puerper* or primigravid* or primiparous or multiparous or nulliparous or multigravid* or pregnan* or obstetric* or trimester*))) AND (TITLE ( exercise* OR "physical* activ*" OR "strenuous activit*" OR "physical inactiv*" OR sedentary OR running OR plyometric* OR yoga OR "tai chi" OR "weight training" OR "resistance training" OR swim* OR sport* OR athlet* OR walk OR walking OR "muscle strengthening" OR "muscle conditioning" OR "muscular conditioning" OR "weight lifting" OR "lifting weight*" ))) OR ((TITLE-ABS-KEY((insulin or glucose or "glycemic control" or "glycaemic control" or "blood sugar" or diabet* or prediabet* or hba1c or "glycosylated hemoglobin" or "glycosylated haemoglobin" or hyperglycemi* or hyperglycaemi* or hypoglycemi* or hypoglycaemi* or (weight w/3 (gain* or change* or loss or lose or retention)) or bmi or "body mass index" or "body composition" or "skinfold thickness" or ((hip or waist) w/2 ratio) or ((waist or abdominal) w/2 circumference) or overweight or obes* or adipos* or underweight or "normal weight" or "healthy weight" or hypertension or hypotension or fainting or syncope or lightheaded* or "light headed*" or dizziness or "blood pressure" or toxemi* or toxaemi* or "eph complex" or proteinuria or edema or hemodynamic* or haemodynamic* or systolic or diastolic or cardiovascular or cardiometabolic or "cardio-metabolic" or metabolic or heart or cardio* or cardiac or lipid* or "placental growth factor*" or triglyceride* or ldl or hdl or lipoprotein or cholesterol or dehydrat* or heart disease* or "cardiovascular disease*" or safe* or harm* or risk* or fitness or "aerobic capacity" or "oxygen consumption" or "vo2 max" or vo2max or "vo2 peak" or vo2peak or frequency or intensity or duration or "dose response" or fitt or zone or (type* w/2 exercise) or "chronic disease*" or "chronic illness*" or osteoporosis or incontinen* or cramp* or ((hip or back or pelvic or pelvis) w/3 (pain or discomfort or ache)) or "mental health" or "mental disorder*" or "mental illness*" or "mental disease*" or depression or depressive or mood or anxiety or "well being" or wellbeing or wellness or fatigue or exhaustion or injur* or trauma or postur* or supine or valsalva or "diastasis recti" or "rectus abdominis" or "inter rectus distance" or "interrectus distance"))) AND (((TITLE(exercise* or "physical* activ*" or "strenuous activit*" or "physical inactiv*" or sedentary or running or plyometric* or yoga or "tai chi" or "weight training" or "resistance training" or swim* or sport* or athlet* or walk or walking OR "muscle strengthening" or "muscle conditioning" or "muscular conditioning" or "weight lifting" or "lifting weight*") AND TITLE-ABS-KEY(pregnan* or antenatal or prenatal or perinatal or postnatal or prepartum or antepartum or postpartum or "pre partum" or "ante partum" or "post partum" or puerper*)) AND (TITLE-ABS-KEY ( pregnan* OR antenatal OR prenatal OR perinatal OR postnatal OR prepartum OR antepartum OR postpartum OR "pre partum" OR "ante partum" OR "post partum" OR puerper* ))))) AND NOT (TITLE(rat or rats or mouse or mice or cow or cows or bovine or sheep or ewe*))

Web of Science Core Collection (including Emerging Science Citation Index)

#1 TI=(exercise* or "physical* activ*" or "strenuous activit*" or "physical inactiv*" or sedentary or running or plyometric* or yoga or "tai chi" or "weight training" or "resistance training" or swim* or sport* or athlet* or walk or walking or (muscle* or muscular or strength) near/2 conditioning or weight* near/2 lift*)

#2 TS=(pregnan* or antenatal or prenatal or perinatal or postnatal or prepartum or antepartum or postpartum or "pre partum" or "ante partum" or "post partum" or puerper* or primigravid* or primiparous or multiparous or nulliparous or multigravid* or trimester* or obstetric*)

#3 #1 AND #2

#4 TS=(insulin or glucose or "glycemic control" or "glycaemic control" or "blood sugar" or diabet* or prediabet* or hba1c or "glycosylated hemoglobin" or "glycosylated haemoglobin" or hyperglycemi* or hyperglycaemi* or hypoglycemi* or hypoglycaemi* or (weight near/3 (gain* or change* or loss or lose or retention)) or bmi or "body mass index" or "body composition" or "skinfold thickness" or ((hip or waist) near/2 ratio) or ((waist or abdominal) near2 circumference) or overweight or obes* or adipos* or underweight or "normal weight" or "healthy weight" or hypertension or hypotension or fainting or syncope or lightheaded* or "light headed*" or dizziness or "blood pressure" or toxemi* or toxaemi* or "eph complex" or proteinuria or edema or hemodynamic* or haemodynamic* or systolic or diastolic or cardiovascular or cardiometabolic or "cardio-metabolic" or metabolic or heart or cardio* or cardiac or lipid* or "placental growth factor*" or triglyceride* or ldl or hdl or lipoprotein or cholesterol or dehydrat* or heart disease* or "cardiovascular disease*" or safe* or harm* or risk* or fitness or "aerobic capacity" or "oxygen consumption" or "vo2 max" or vo2max or "vo2 peak" or vo2peak or frequency or intensity or duration or "dose response" or fitt or zone or (type* near2 exercise) or "chronic disease*" or "chronic illness*" or osteoporosis or incontinen* or cramp* or ((hip or back or pelvic or pelvis) near/3 (pain or discomfort or ache)) or "mental health" or "mental disorder*" or "mental illness*" or "mental disease*" or depression or depressive or mood or anxiety or "well being" or wellbeing or wellness or fatigue or exhaustion or injur* or traumaor postur* or supine or valsalva or "diastasis recti" or "rectus abdominis" or "inter rectus distance" or "interrectus distance")

#5 #3 AND #4

#6 TS=((birth or pregnancy or childbirth) near/3 (outcome* or complication*) or (spontaneous or induc* or onset or length) near/3 (labor or labour) or cesarean or caesarean or episiotom* or "vaginal delivery" or "gestational diabetes" or "pre-eclampsia" or preeclampsia or gestosis OR (normal or instrumental or assisted) near/2 (delivery or birth or childbirth) or forceps or ventouse or "vacuum extraction" or miscarriage* or "spontaneous abortion*" OR ("mode of delivery" or "type of delivery") and (pregnan* or birth or childbirth or obstetric* or labor or labour) OR (tear* or ruptur* or hemorrhage*) near/2 (placent* or vagin* or membran* or periton*))

#7 #1 AND #6

#8 #5 OR #7

#9 TS=(rat or rats or mouse or mice or cow or cows or bovine or sheep or ewe*)

#10 #9 NOT #8

Clinicatrials.gov

(exercise OR "physical activity" ) AND (antenatal OR prenatal OR perinatal OR postnatal OR prepartum OR antepartum OR postpartum OR "pre partum" OR fetus OR foetus OR fetal OR foetal)

(exercise OR "physical activity" ) AND ("ante partum" OR "post partum" OR puerper* OR primigravida OR primiparous OR multiparous OR nulliparous OR multigravida OR trimester OR trimesters OR obstetric)

*Fetal Outcomes Strategies*

MEDLINE

1. exp Exercise/ or Athletes/ or exp Exercise Movement Techniques/ or exp Exercise Therapy/ or exp Sports/ or Motor Activity/ or Physical Exertion/ or Sedentary Lifestyle/ or (exercise or physical* activ* or physical* inactiv* or sedentary or running or plyometric* or yoga or tai chi or weight training or resistance training or swim* or sport* or athlet* or walk or walking or mvpa or ltpa or stretching or aerobic capacity or fitness).ti,kf. or exercise.ab. /freq=2 or (weight* adj2 lift*).ti,kf. or ((muscle or muscular or strength*) adj2 conditioning).ti,kf.

2. Pregnancy/ or exp Pregnancy Complications/ or Pregnancy Outcome/ or exp Pregnancy Trimesters/ or Peripartum Period/ or Postpartum Period/ or pregnan*.hw. or (pregnan* or antenatal or prenatal or perinatal or postnatal or prepartum or antepartum or postpartum or pre partum or ante partum or post partum or puerper* or primigravid* or primiparous or multiparous or nulliparous or multigravid* or trimester* or obstetric*).ti,kf.

3. 1 and 2

4. ((pregnan* or maternal or antenatal or prenatal or perinatal or postnatal or prepartum or antepartum or postpartum or puerper* or pre partum or ante partum or post partum) adj5 (exercise or physical* activ* or strenuous activit* or physical* inactiv* or sedentary or running or plyometric* or yoga or tai chi or weight training or resistance training or (weight* adj2 lift*) or swim* or sport* or athlet* or walk or walking or mvpa or ltpa or stretching or aerobic capacity or fitness or ((muscle or muscular or strength*) adj2 conditioning))).ab.

5. 3 or 4

6. exp birth weight/ or fetal weight/

7. infant, low birth weight/ or infant, small for gestational age/ or exp infant, very low birth weight/ or infant, postmature/ or exp infant, premature/

8. ((preterm or pre matur* or prematur* or post matur* or postmatur*) adj2 birth).mp.

9. Fetal Growth Retardation/ or fetal hypoxia/ or fetal macrosomia/

10. exp Fetal Development/ or exp Congenital Abnormalities/ or exp Fetus/ or (fetus or fetal).ti,hw,kf.

11. maternal fetal exchange/ or (exp Uterus/ and exp Regional Blood Flow/) or (placenta* or uteroplacenta* or ((maternal fetal or fetomaternal or transplacental) adj2 (transfusion or exchange))).mp.

12. ((fetal or fetus) adj2 (response or matur*)).mp.

13. ((fetal or fetus or neonat* or newborn or infant) adj3 (growth or develop* or viability or viable or weight or wellbeing or well being or health or heart rate or heartrate or bradycardia or hypoxi* or hypoglycemi* or movement or oxygenation)).mp

14. (((uterine or uterus) adj2 (blood flow or circulat*)) or ((uterine or umbilical or mid* cerebral) adj2 doppler)).mp.

15. (intrauterine growth or iugr).mp.

16. ((perinatal or fetal or fetus or neonat* or newborn* or infant*) adj3 (mortality or morbidity or death or outcome* or complication*)).mp.

17. (still birth or stillbirth).mp.

18. (birth weight or birthweight or macrosomia or gestational age or lga or sga or preterm or (prematur* adj2 (infant* or neonat* or newborn* or birth or labor))).mp.

19. ((neonatal or newborn* or infant* or fetus or fetal) and (fat* or abdominal circumference or body composition or bmi or body mass index or waist circumference or skeletal size or height or anthropometric* or apgar or adipos* or ph or base excess or metabolic or acidosis or insulin or diabet* or hyperbilirubinemi*)).mp.

20. (fetus or fetal).mp. and (adaptation, physiological/ or me.fs.)

21. (((birth or delivery) adj3 (trauma or injur* or defect*)) or (dystocia or nicu or neonatal intensive care or brachial plexus)).mp.

22. exp Birth Injuries/

23. ((neonat* or infant* or newborn*) and (ponderal index or skinfold or bmi or body mass index)).mp.

24. Cerebral Palsy/ or exp Neural Tube Defects/ or Cleft Palate/ or (cerebral palsy or neural tube defect* or spina bifida or anencephal* or encephalocele* or iniencephal* or spinal dyraphism or diastematomyel* or lipomingocele* or lipmyelomeningocele* or meningomyelocele* or cleft palate* or cleft lip*).mp.

25. (((development* or learning or intellectual* or cognitive* or language or communication or speech or motor) adj2 (disorder* or disab* or delay*)) or behavior disorder* or attention deficit or autis* or asperger* or child development or developmental milestone* or neurodevelopment* or cognitive development or motor development or motor skill* or psychosocial development or chronic disease* or chronic illness* or cardiovascular or cardiometabolic or diabet* or heart disease*).mp. or exp Heart Disease/ or exp Mental Disorders Diagnosed in Childhood/

26. Pediatric Obesity/ or ((child* or pediatric) adj2 (obes* or overweight)).mp.

27. or/6-25

28. 5 and 27

29. (animals/ not (animals/ and humans/)) or ((rat or rats or mouse or mice or cow or cows or bovine or sheep or ewe*) not ((rat or rats or mouse or mice or cow or cows or bovine or cattle or sheep or ewe*) and (human* or women))).ti,ab,kf. or (rat or rats or mouse or mice or cow or cows or bovine or cattle or sheep or ewe*).ti.

30. 28 not 29

EMBASE

1. exp *exercise/ or *athlete/ or exp *kinesiotherapy/ or exp *sport/ or exp *physical activity/ or *sedentary lifestyle/ or (exercise or physical* activ* or physical* inactiv* or sedentary or running or plyometric* or yoga or tai chi or weight training or resistance training or swim* or sport* or athlet* or walk or walking or mvpa or ltpa or stretching or aerobic capacity or fitness or sport*).ti,kw. or exercise.ab. /freq=2 or (weight* adj2 lift*).ti,kw. or ((muscle or muscular or strength*) adj2 conditioning).ti,kw.

2. exp pregnancy/ or exp pregnancy complications/ or pregnancy outcome/ or perinatal period/ or puerperium/ or pregnan*.hw. or (pregnan* or antenatal or prenatal or perinatal or postnatal or prepartum or antepartum or postpartum or pre partum or ante partum or post partum or puerper* or primigravid* or primiparous or multiparous or nulliparous or multigravid* or trimester* or obstetric*).ti,kw.

3. 1 and 2

4. ((pregnan* or maternal or antenatal or prenatal or perinatal or postnatal or prepartum or antepartum or postpartum or pre partum or ante partum or post partum or puerper*) adj5 (exercise or physical* activ* or strenuous activit* or physical* inactiv* or sedentary or running or plyometric* or yoga or tai chi or weight training or resistance training or (weight* adj2 lift*) or swim* or sport* or athlet* or walk or walking or mvpa or ltpa or stretching or aerobic capacity or fitness or ((muscle or muscular or strength*) adj2 conditioning))).ab.

5. 3 or 4

6. fetus/ or exp birth weight/ or fetus weight/ or "parameters concerning the fetus, newborn and pregnancy"/ or apgar score/ or fetus heart rate/ or exp fetus maturity/ or fetus mortality/ or fetus outcome/ or fetus risk/ or gestational age/ or live birth/ or exp perinatal morbidity/ or exp perinatal mortality/ or prenatal mortality/ or exp intrauterine growth retardation/ or exp "immature and premature labor"/ or exp fetus growth/ or exp prenatal growth/ or fetus hypoxia/ or macrosomia/ or exp fetus development/ or exp congenital disorder/ or exp fetus disease/ or fetomaternal transfusion/ or exp stillbirth/ or spontaneous abortion/ or birth injury/ or cerebral palsy/ or exp neural tube defect/ or child development/ or postnatal development/ or exp mental development/ or childhood obesity/ or exp body composition/ or anthropometric parameters/ or abdominal circumference/ or hip circumference/ or sagittal abdominal diameter/ or waist circumference/ or waist hip ratio/ or waist to height ratio/ or weight height ratio/

7. placenta insufficiency/

8. 6 or 7

9. (f?etus or f?etal).ti,hw,kw. or ((f?etal or f?etus) adj2 (response or matur*)).mp.

10. (placenta* or uteroplacenta* or ((maternal f?etal or transplacental or f?etomaternal) adj2 (exchange or transfusion))).mp.

11. ((f?etal or f?etus or neonat* or newborn or infant) adj3 (growth or develop* or viability or viable or weight or wellbeing or well being or health or heart rate or heartrate or bradycardia or hypoxi* or hypoglyc?emi* or movement or oxygenation)).mp.

12. (((uterine or uterus) adj2 (blood flow or circulat*)) or ((uterine or umbilical or mid* cerebral) adj2 doppler)).mp.

13. (intrauterine growth or iugr).mp.

14. ((perinatal or f?etal or f?etus or neonat* or newborn* or infant*) adj3 (mortality or death or outcome* or complication*)).mp.

15. (still birth or stillbirth).mp.

16. (birth weight or birthweight or macrosomia or gestational age or lga or sga or preterm or (prematur* adj2 (infant* or neonat* or newborn* or birth or labo?r))).mp.

17. ((neonatal or newborn* or infant* or f?etus or f?etal) and (fat* or abdominal circumference or body composition or bmi or body mass index or waist circumference or skeletal size or height or anthropometric* or apgar or adipos* or ph or base excess or metabolic or acidosis or insulin or diabet* or hyperbilirubin?emi*)).mp.

18. (((birth or delivery) adj3 (trauma or injur* or defect*)) or (dystocia or nicu or neonatal intensive care or brachial plexus)).mp.

19. ((neonat* or infant* or newborn*) and (ponderal index or skinfold or bmi or body mass index)).mp.

20. (cerebral palsy or neural tube defect* or spina bifida or anencephal* or encephalocele* or iniencephal* or spinal dyraphism or diastematomyel* or lipomingocele* or lipmyelomeningocele* or meningomyelocele* or cleft palate* or cleft lip*).mp.

21. (((development* or learning or intellectual* or cognitive* or language or communication or speech or motor) adj2 (disorder* or disab* or delay* or impair*)) or behavio?r disorder* or attention deficit or autis* or asperger* or child development or developmental milestone* or neurodevelopment* or cognitive development or motor development or motor skill* or psychosocial development or chronic disease* or chronic illness* or cardiovascular or cardiometabolic or diabet* or heart disease*).mp. or childhood disease/ or exp infant disease/ or exp "disorders of higher cerebral function"/ or exp heart disease/

22. ((child* or p?ediatric) adj2 (obes* or overweight)).mp.

23. or/9-22

24. 8 or 23

25. 5 and 24

26. exp animal/ not (exp animal/ and human/)

27. 25 not 26

PsycInfo

1. physical activity/ or exp exercise/ or activity level/ or athletes/ or exp sports/ or ((exercise or physical* activ* or strenuous activit* or physical* inactiv* or sedentary or running or plyometric* or yoga or tai chi or weight training or resistance training or swim* or sport* or athlet* or walk or walking or mvpa or ltpa or stretching or aerobic capacity).ti,ab,id. or ((weight* adj2 lift*) or ((muscle or muscular or strength*) adj2 conditioning))).ti,ab,id.

2. exp pregnancy/ or obstetrical complications/ or pregnancy outcomes/ or pregnan*.ti,hw,id. or (antenatal or prenatal or perinatal or postnatal or prepartum or antepartum or postpartum or primigravid* or primiparous or multiparous or nulliparous or multigravid* or trimester* or obstetric*).ti,ab,id.

3. 1 and 2

4. prenatal development/ or birth weight/ or prenatal exposure/ or premature birth/ or fetus/ or amniotic fluid/ or (blood flow/ and uterus/)

5. (f?etus or f?etal or ((preterm or pre matur* or prematur* or post matur* or postmatur*) adj2 birth)).mp.

6. (placenta* or uteroplacenta* or ((maternal f?etal or f?etomaternal or transplacental) adj2 (transfusion or exchange))).mp.

7. ((neonat* or newborn or infant) adj3 (growth or develop* or viability or viable or weight or wellbeing or well being or health or heart rate or heartrate or bradycardia or hypoxi* or hypoglyc?emi* or movement or oxygenation)).mp.

8. (((uterine or uterus) adj2 (blood flow or circulat*)) or ((uterine or umbilical or mid* cerebral) adj2 doppler)).mp.

9. (intrauterine growth or iugr).mp.

10. ((perinatal or f?etal or f?etus or neonat* or newborn* or infant*) adj3 (mortality or morbidity or death or outcome* or complication*)).mp.

11. (still birth or stillbirth).mp.

12. (birth weight or birthweight or macrosomia or gestational age or lga or sga or preterm or (prematur* adj2 (infant* or neonat* or newborn* or birth or labo?r))).mp.

13. ((neonatal or newborn* or infant* or f?etus or f?etal) and (fat* or abdominal circumference or body composition or bmi or body mass index or waist circumference or skeletal size or height or anthropometric* or apgar or adipos* or ph or base excess or metabolic or acidosis or insulin or diabet* or hyperbilirubin?emi*)).mp.

14. (((birth or delivery) adj3 (trauma or injur* or defect*)) or (dystocia or nicu or neonatal intensive care or brachial plexus)).mp.

15. birth injuries/ or birth trauma/

16. ((neonat* or infant* or newborn*) and (ponderal index or skinfold or bmi or body mass index)).mp.

17. exp congenital disorders/ or cerebral palsy/ or cleft palata/ or (cerebral palsy or neural tube defect* or spina bifida or anencephal* or encephalocele* or iniencephal* or spinal dyraphism or diastematomyel* or lipomingocele* or lipmyelomeningocele* or meningomyelocele* or cleft palate* or cleft lip*).mp.

18. exp developmental disabilities/ or exp communication disorders/ or exp delayed development/ or exp intellectual development disorder/ or exp learning disorders/ or exp nervous system disorders/ or exp pervasive developmental disorders/

19. (((development* or learning or intellectual* or cognitive* or language or communication or speech or motor) adj2 (disorder* or disab* or delay*)) or behavio?r disorder* or attention deficit or autis* or asperger* or child development or developmental milestone* or neurodevelopment* or cognitive development or motor development or motor skill* or psychosocial development or chronic disease* or chronic illness* or cardiovascular or cardiometabolic or diabet* or heart disease*).mp. or health disorders/

20. ((child* or p?ediatric) adj2 (obes* or overweight)).mp.

21. or/4-20

22. 3 and 21

23. first posting.ps.

24. 22 not 23

25. limit 24 to human

26. 22 not 24

27. 25 or 26

CINAHL

S1 ( (MH "Exercise+") OR (MH "Athletes+") OR (MH "Therapeutic Exercise+") OR (MH "Physical Fitness+") OR (MH "Physical Activity") OR (MH "Physical Endurance+") OR (MH "Exertion+") OR (MH "Sports+") OR (MH "Life Style, Sedentary") OR (MH "Yoga+") OR (MH "Tai Chi") ) OR TI ( exercise or "physical* activ*" or "strenuous activit*" or "physical* inactiv*" or sedentary or running or plyometric* or yoga or "tai chi" or "weight training" or "resistance training" or swim* or sport* or athlet* or walk or walking or mvpa or ltpa or stretching or "aerobic capacity" or fitness or weight* n2 lift* or (muscle or muscular or strength*) n2 conditioning )

S2 ( (MH "Pregnancy") OR (MH "Pregnancy Complications+") OR (MH "Pregnancy Outcomes") OR (MH "Pregnancy Trimesters+") OR (MH "Postnatal Period") OR (MH "Puerperium") ) OR MW pregnan* OR TI ( pregnan* or antenatal or prenatal or perinatal or postnatal or prepartum or antepartum or postpartum or pre partum or ante partum or post partum or puerper* or primigravid* or primiparous or multiparous or nulliparous or multigravid* or trimester* or obstetric* )

S3 S1 AND S2

S4 AB ((pregnan* or maternal or antenatal or prenatal or perinatal or postnatal or prepartum or antepartum or postpartum or puerper* or "pre partum" or "ante partum" or "post partum") n5 (exercise or "physical* activ*" or "strenuous activit*" or "physical* inactiv*" or sedentary or running or plyometric* or yoga or "tai chi" or "weight training" or "resistance training" or weight* n2 lift* or "lift* weight*" or swim* or sport* or athlet* or walk or walking or mvpa or ltpa or stretching or "aerobic capacity" or fitness or (muscle or muscular or strength*) n2 conditioning)

S5 S3 OR S4

S6 (MH "Birth Weight") OR (MH "Infant, Very Low Birth Weight") OR (MH "Infant, Low Birth Weight+") OR (MH "Fetal Weight") OR (MH "Infant, Small for Gestational Age") OR (MH "Infant, Premature") OR (MH "Infant, Premature, Diseases+") OR (MH "Fetal Growth Retardation") OR (MH "Fetal Anoxia") OR (MH "Fetal Macrosomia") OR (MH "Infant, Postmature") OR (MH "Infant, Large for Gestational Age") OR (MH "Fetus+") OR (MH "Maternal-Fetal Exchange") OR (MH "Perinatal Death") OR (MH "Birth Injuries+") OR (MH "Cerebral Palsy") OR (MH "Neural Tube Defects+") OR (MH "Cleft Palate") OR (MH "Heart Diseases+") OR (MH "Mental Disorders Diagnosed in Childhood+") OR (MH "Pediatric Obesity")

S7 (MH "Uterus+") AND (MH "Blood Circulation+")

S8 ( TI (f#etus or f#etal) or MW (f#etus OR f#etal OR ( placenta* or uteroplacenta* or ("maternal f#etal" or f#etomaternal or transplacental) w2 (transfusion or exchange) or (f#etal or f#etus) w2 (response or matur*) )

S9 ( (f#etal or f#etus or neonat* or newborn or infant) n3 (growth or develop* or viability or viable or weight or wellbeing or "well being" or health or "heart rate" or heartrate or bradycardia or hypoxi* or hypoglyc#emi* or movement or oxygenation) ) OR ( (uterine or uterus) n2 ("blood flow" or circulat*) or (uterine or umbilical or mid* cerebral) n2 doppler ) OR ( "intrauterine growth" or iugr )

S10 ( (perinatal or f#etal or f#etus or neonat* or newborn* or infant*) n3 (mortality or morbidity or death or outcome* or complication*) ) OR ( "still birth" or stillbirth or (preterm or "pre matur*" or prematur* or "post matur*" or postmatur*) w2 (birth or childbirth or labo#r or infant* or newborn* or neonat*) ) OR ( "birth weight" or birthweight or macrosomia or "gestational age" or lga or sga )

S11 ( (perinatal or f#etal or f#etus or neonat* or newborn* or infant*) n3 (mortality or morbidity or death or outcome* or complication*) ) OR ( "still birth" or stillbirth or (preterm or pre matur* or prematur* or post matur* or postmatur*) w2 (birth or childbirth or labo#r or infant* or newborn* or neonat*) ) OR ( "birth weight" or birthweight or macrosomia or gestational age or lga or sga ) OR ( (neonatal or newborn* or infant* or fetus or fetal or foetus or foetal) and (fat* or "abdominal circumference" or "body composition" or bmi or "body mass index" or "waist circumference" or "skeletal size" or height or anthropometric* or apgar or adipos* or ph or base n2 excess or metabolic or acidosis or insulin or diabet* or hyperbilirubin#emi*) )

S12 ( (MH "Adaptation, Physiological") OR MM metabolism ) AND ( f#etus or f#etal )

S13 ( (birth or delivery) n3 (trauma or injur* or defect*) or dystocia or nicu or "neonatal intensive care" or "brachial plexus" ) OR ( (neonat* or infant* or newborn*) and (ponderal index or skinfold or bmi or body mass index) ) OR ( "cerebral palsy" or "neural tube defect*" or "spina bifida" or anencephal* or encephalocele* or iniencephal* or "spinal dyraphism" or diastematomyel* or lipomingocele* or lipmyelomeningocele* or meningomyelocele* or "cleft palate*" or "cleft lip*" )

S14 ( (development* or learning or intellectual* or cognitive* or language or communication or speech or motor) n2 (disorder* or disab* or delay*) ) OR ( "behavio#r disorder*" or "attention deficit" or autis* or asperger* or "child development" or "developmental milestone*" or neurodevelopment* or "cognitive development" or "motor development" or "motor skill*" or "psychosocial development" or "chronic disease*" or "chronic illness*" or cardiovascular or cardiometabolic or diabet* or "heart disease*" ) OR ( (child* or p#ediatric) n2 (obes* or overweight) )

S15 S6 OR S7 OR S8 OR S9 OR S10 OR S11 OR S12 OR S13 OR S14

S16 S5 AND S15

Sport Discus/Child Development & Adolescent Studies/ERIC

S1 exercise or "physical* activ*" or "strenuous activit*" or "physical* inactiv*" or sedentary or running or plyometric* or yoga or "tai chi" or "weight training" or "resistance training" or swim* or sport* or athlet* or walk or walking or mvpa or ltpa or stretching or "aerobic capacity" or fitness or weight* n2 lift* or (muscle or muscular or strength*) n2 conditioning

S2 pregnan* or antenatal or prenatal or perinatal or postnatal or prepartum or antepartum or postpartum or "pre partum" or "ante partum" or "post partum" or puerper* or primigravid* or primiparous or multiparous or nulliparous or multigravid* or trimester* or obstetric*

S3 S1 and S2

S4 ( f#etus or f#etal or ( placenta* or uteroplacenta* or ("maternal f#etal" or f#etomaternal or transplacental) w2 (transfusion or exchange) or (f#etal or f#etus) w2 (response or matur*) ) ) OR ( (f#etal or f#etus or neonat* or newborn or infant) n3 (growth or develop* or viability or viable or weight or wellbeing or "well being" or health or heart rate or heartrate or bradycardia or hypoxi* or hypoglyc#emi* or movement or oxygenation) ) OR ( (uterine or uterus) n2 ("blood flow" or "blood circulat*") or (uterine or umbilical or mid* cerebral) n2 doppler or "intrauterine growth" or iugr )

S5 ( (perinatal or f#etal or f#etus or neonat* or newborn* or infant*) n3 (mortality or morbidity or death or outcome* or complication*) ) OR ( "still birth" or stillbirth or (preterm or "pre matur*" or prematur* or "post matur*" or postmatur*) w2 (birth or childbirth or labo#r or infant* or newborn* or neonat*) ) OR ( “birth weight" or birthweight or macrosomia or "gestational age" or lga or sga ) OR ( (neonatal or newborn* or infant* or f#etus or f#etal) and (fat* or "abdominal circumference" or "body composition" or bmi or "body mass index" or "waist circumference" or "skeletal size" or height or anthropometric* or apgar or adipos* or ph or base n2 excess or metabolic or acidosis or insulin or diabet* or hyperbilirubin#emi*) )

S6 ( birth or delivery) n3 (trauma or injur* or defect*) or dystocia or nicu or "neonatal intensive care" or "brachial plexus" ) OR ( (neonat* or infant* or newborn*) and ("ponderal index" or skinfold or bmi or body mass index) ) OR ( "cerebral palsy" or "neural tube defect*" or "spina bifida" or anencephal* or encephalocele* or iniencephal* or "spinal dyraphism" or diastematomyel* or lipomingocele* or lipmyelomeningocele* or meningomyelocele* or "cleft palate*" or "cleft lip*" )

S7 ( (development* or learning or intellectual* or cognitive* or language or communication or speech or motor) n2 (disorder* or disab* or delay*) ) OR ( "behavio#r disorder*" or "attention deficit" or autis* or asperger* or "child development" or "developmental milestone*" or neurodevelopment* or "cognitive development" or "motor development" or "motor skill*" or "psychosocial development" or "chronic disease*" or "chronic illness*" or cardiovascular or cardiometabolic or diabet* or "heart disease*" ) OR ( (child* or p#ediatric) n2 (obes* or overweight) )

S8 S4 OR S5 OR S6 OR S7

S9 S3 AND S8

Scopus

((TITLE-ABS-KEY( fetus or fetal or foetus or foetal or "intrauterine growth" or iugr) OR TITLE-ABS-KEY((placenta* or uteroplacenta* or "maternal fetal" or "maternal foetal" or fetomaternal or foetomaternal or transplacental) w/2 transfusion)) or (TITLE-ABS-KEY((fetal or foetal or fetus or foetus) w/2 (response or matur*))) or (TITLE-ABS-KEY ( ( ( uterine OR uterus ) W/2 ( "blood flow" OR circulat* ) ) OR ( ( uterine OR umbilical OR "mid* cerebral" ) W/2 doppler ) OR "intrauterine growth" OR iugr )) or (TITLE-ABS-KEY((fetal or foetal or fetus or foetus or neonat* or newborn or infant) and (growth or develop* or viability or viable or weight or wellbeing or "well being" or health or heart rate or heartrate or bradycardia or hypoxi* or hypoglycemi* or hypoglycaemi* or movement or oxygenation))) or (TITLE-ABS-KEY("still birth" or stillbirth or ((preterm or "pre matur*" or prematur* or "post matur*" or postmatur*) w/2 (birth or childbirth or labor or labour or infant* or newborn* or neonat*))) OR TITLE-ABS-KEY(( "birth weight" or birthweight or macrosomia or "gestational age" or lga or sga ) ) OR TITLE-ABS-KEY(((neonatal or newborn* or infant* or fetus or fetal or foetus or foetal) and (fat* or "abdominal circumference" or "body composition" or bmi or "body mass index" or "waist circumference" or "skeletal size" or height or anthropometric* or apgar or adipos* or ph or "base excess" or metabolic or acidosis or insulin or diabet* or hyperbilirubinemi* or hyperbilirubinaemi*)))) or (TITLE-ABS-KEY((perinatal or fetal or fetus or foetal or foetus or neonat* or newborn* or infant*) W/3 (mortality or morbidity or death or outcome* or complication*) )) or (TITLE-ABS-KEY((( birth or delivery) w/3 (trauma or injur* or defect*)) or dystocia or nicu or "neonatal intensive care" or "brachial plexus" ) OR TITLE-ABS-KEY(( (neonat* or infant* or newborn*) and ("ponderal index" or skinfold or bmi or body mass index) ) ) OR TITLE-ABS-KEY("cerebral palsy" or "neural tube defect*" or "spina bifida" or anencephal* or encephalocele* or iniencephal* or "spinal dyraphism" or diastematomyel* or lipomingocele* or lipmyelomeningocele* or meningomyelocele* or "cleft palate*" or "cleft lip" )) or (TITLE-ABS-KEY(( (development* or learning or intellectual* or cognitive* or language or communication or speech or motor) w/2 (disorder* or disab* or delay*) )) OR TITLE-ABS-KEY("behavior disorder*" or "behaviour disorder*" or "attention deficit" or autis* or asperger* or "child development" or "developmental milestone*" or neurodevelopment* or "cognitive development" or "motor development" or "motor skill*" or "psychosocial development" or "chronic disease*" or cardiovascular or cardiometabolic or diabet* or "heart disease*") OR TITLE-ABS-KEY(( (child* or pediatric or paediatric) w/2 (obes* or overweight) )))) and ((TITLE( exercise* OR "physical* activ*" OR "strenuous activit*" OR "physical inactiv*" OR sedentary OR running OR plyometric* OR yoga OR "tai chi" OR "weight training" OR "resistance training" OR swim* OR sport* OR athlet* OR walk OR walking OR "muscle strengthening" OR "muscle conditioning" OR "muscular conditioning" OR "weight lifting" OR "lifting weight*" )) AND (TITLE-ABS-KEY ( pregnan* or antenatal or prenatal or perinatal or postnatal or prepartum or antepartum or postpartum or "pre partum" or "ante partum" or "post partum" or puerper* or primigravid* or primiparous or multiparous or nulliparous or multigravid* or trimester* or obstetric*))) AND NOT TITLE-ABS-KEY(rat or rats or mouse or mice or cow or cows or bovine or cattle or sheep or ewe*)

Web of Science Core Collection (including Emerging Sources Citation Index)

#1 TI=(exercise* or "physical* activ*" or "strenuous activit*" or "physical inactiv*" or sedentary or running or plyometric* or yoga or "tai chi" or "weight training" or "resistance training" or swim* or sport* or athlet* or walk or walking or (muscle* or muscular or strength) near/2 conditioning or weight* near/2 lift*)

#2 TS=(pregnan* or antenatal or prenatal or perinatal or postnatal or prepartum or antepartum or postpartum or pre partum or ante partum or post partum or puerper* or primigravid* or primiparous or multiparous or nulliparous or multigravid* or trimester* or obstetric*)

#3 #1 AND #2

#4 TI=(f$etus or f$etal) or TS=(placenta* or uteroplacenta* or ("maternal f$etal" or f$etomaternal or transplacental) near/2 (transfusion or exchange) or (f$etal or f$etus) near/2 (response or matur*) )

#5 TS=((f$etal or f$etus or neonat* or newborn or infant) near/3 (growth or develop* or viability or viable or weight or wellbeing or "well being" or health or "heart rate" or heartrate or bradycardia or hypoxi* or hypoglyc$emi* or movement or oxygenation) OR (uterine or uterus) near/2 ("blood flow" or "circulat*") or ((uterine or umbilical or "mid* cerebral") near/2 doppler) OR "intrauterine growth" or iugr )

#6 TS=( (perinatal or f$etal or f$etus or neonat* or newborn* or infant*) near/3 (mortality or morbidity or death or outcome* or complication*) OR "still birth" or stillbirth OR "birth weight" or birthweight or macrosomia or "gestational age" or lga or sga )

#7 TS=( (perinatal or f$etal or f$etus or neonat* or newborn* or infant*) near/3 (mortality or morbidity or death or outcome* or complication*) OR "still birth" or stillbirth or (preterm or "pre matur*" or prematur* or "post matur*" or postmatur*) near/2 (birth or childbirth or labo$r or infant* or newborn* or neonat*) OR "birth weight" or birthweight or macrosomia or gestational age or lga or sga OR (neonatal or newborn* or infant* or f$etus or f$etal) and (fat* or "abdominal circumference" or "body composition" or bmi or "body mass index" or "waist circumference" or "skeletal size" or height or anthropometric* or apgar or adipos* or ph or base near/2 excess or metabolic or acidosis or insulin or diabet* or hyperbilirubin$emi*))

#8 TS=((birth or delivery) near/3 (trauma or injur* or defect*) or dystocia or nicu or "neonatal intensive care" or "brachial plexus" OR ( (neonat* or infant* or newborn*) and (ponderal index or skinfold or bmi or body mass index) ) OR "cerebral palsy" or "neural tube defect*" or "spina bifida" or anencephal* or encephalocele* or iniencephal* or "spinal dyraphism" or diastematomyel* or lipomingocele* or lipmyelomeningocele* or meningomyelocele* or "cleft palate*" or "cleft lip*" )

#9 TS=( (development* or learning or intellectual* or cognitive* or language or communication or speech or motor) near/2 (disorder* or disab* or delay*) OR "behavio$r disorder*" or "attention deficit" or autis* or asperger* or "child development" or "developmental milestone*" or neurodevelopment* or "cognitive development" or "motor development" or "motor skill*" or "psychosocial development" or "chronic disease*" or "chronic illness*" or cardiovascular or cardiometabolic or diabet* or "heart disease*" OR (child* or p$ediatric) near/2 (obes* or overweight) )

#10 #9 OR #8 OR #7 OR #6 OR #5 OR #4

#11 #3 AND #10

#12 TS=(rat or rats or mouse or mice or cow or cows or bovine or cattle or sheep or ewe*)

#13 #11 NOT #12

Clinicatrials.gov

(exercise OR "physical activity" ) AND (antenatal OR prenatal OR perinatal OR postnatal OR prepartum OR antepartum OR postpartum OR "pre partum" OR fetus OR foetus OR fetal OR foetal)

(exercise OR "physical activity" ) AND ("ante partum" OR "post partum" OR puerper* OR primigravida OR primiparous OR multiparous OR nulliparous OR multigravida OR trimester OR trimesters OR obstetric)

Trip Database

title(exercise OR "physical activity" ) AND title(pregnan* or antenatal OR prenatal OR perinatal OR postnatal OR prepartum OR antepartum OR postpartum OR "pre partum" OR fetus OR foetus OR fetal OR foetal)

**5) References excluded with reasons**

| **No outcome of interest** |
| --- |
| **A. A. Amaeze, M. T. Anasonye, U. O. Abaraogu, S. E. Igwe and U. A. C. Okafor.** Birth weight does not associate with gestational physical activity profile: A retrospective cohort study. *African Journal for Physical, Health Education, Recreation & Dance.* 2015. 21:860-868 |
| **A. A. Johnson, E. M. Knight, C. H. Edwards, et al.** Selected lifestyle practices in urban African American women--relationships to pregnancy outcome, dietary intakes and anthropometric measurements. *J.Nutr.* 1994. 124:963S-972S |
| **A. Alegre, F. Rodriguez-Escudero, E. Cruz and M. Prada.** Influence of work during pregnancy on fetal weight. *J.Reprod.Med.* 1984. 29:334-336 |
| **A. B. Granath, M. S. Hellgren and R. K. Gunnarsson.** Water aerobics reduces sick leave due to low back pain during pregnancy. *Journal of obstetric, gynecologic, and neonatal nursing : JOGNN.* 2006. 35:465-471 |
| **A. Bener and N. M. Saleh.** The impact of socio-economic, lifestyle habits, and obesity in developing of pregnancy-induced hypertension in fast-growing country: global comparisons. 2013. 40:52-57 |
| **A. Bergmann, M. Zygmunt and J. F. Clapp 3.** Running throughout pregnancy: effect on placental villous vascular volume and cell proliferation. *Placenta.* 2004. 25:694-698 |
| **A. Bertolotto, L. Volpe, A. Calianno, et al.** Physical activity and dietary habits during pregnancy: effects on glucose tolerance. *Journal of Maternal-Fetal & Neonatal Medicine.* 2010. 23:1310-1314 |
| **A. Besnier, P. Therme and T. Marqueste.** Influence of physical activity and sports practice before and during pregnancy on the development of gestational diabetes. *Revue Sage - Femme.* 2015. |
| **A. Bonen, P. Campagna, L. Gilchrist, D. C. Young and P. Beresford.** Substrate and endocrine responses  during exercise at selected stages of pregnancy. *J.Appl.Physiol.* 1992. 73:134-142 |
| **A. Bonen, P. D. Campagna, L. Gilchrist and P. Beresford.** Substrate and hormonal responses during exercise classes at selected stages of pregnancy. *Canadian Journal of Applied Physiology.* 1995. 20:440-451 |
| **A. Bugalho, A. Bacci and S. Bergstrom.** Risk factors in Mozambican women with eclampsia: a case-referent study. 2001. 5:30-35 |
| **A. C. Hackney, V. L. Katz, W. J. Watson, M. M. Gall and R. G. McMurray.** Alpha-fetoprotein, prolactin and cortisol responses to maximal exercise during pregnancy. *Scandinavian Journal of Medicine and Science in Sports.* 1993. 3:41-45 |
| **A. Chiolero, G. Paradis and J. S. Kaufman.** Assessing the possible direct effect of birth weight on childhood blood pressure: a sensitivity analysis. *Am.J.Epidemiol.* 2014. 179:4-11 |
| **A. Coban, G. G. Arslan, A. Colakfakioglu and A. Sirlan.** Impact on quality of life and physical ability of pregnancy-related back pain in the third trimester of pregnancy. 2011. 61:1122-1124 |
| **A. Coxon and J. W. Haggith.** The effects of abdominal decompression on vascular haemodynamics in pregnancy and labour. *Journal of Obstetrics & Gynaecology of the British Commonwealth.* 1971. 78:49-54 |
| **A. Croteau, S. Marcoux and C. Brisson.** Work activity in pregnancy, preventive measures, and the risk of delivering a small-for-gestational-age infant. *Am.J.Public Health.* 2006. 96:846-855 |
| **A. Croteau, S. Marcoux and C. Brisson.** Work activity in pregnancy, preventive measures, and the risk of delivering a small-for-gestational-age infant. 2006. 96:846-855 |
| **A. D. Larsen, H. Hannerz, M. Juhl, et al.** Psychosocial job strain and risk of adverse birth outcomes: A study within the Danish national birth cohort. 2013. 70:845-851 |
| **A. D. McDonald, B. Armstrong and N. M. Cherry.** Spontaneous abortion and occupation. *Journal of Occupational Medicine.* 1986. 28:1232-1238 |
| **A. D. McDonald, J. C. McDonald, B. Armstrong, et al.** Fetal death and work in pregnancy. 1988. 45:148-157 |
| **A. D. McDonald, J. C. McDonald, B. Armstrong, N. M. Cherry, A. D. Nolin and D. Robert.** Prematurity and work in pregnancy. *Br.J.Ind.Med.* 1988. 45:56-62 |
| **A. D. Stein, J. M. Rivera and J. M. Pivarnik.** Measuring energy expenditure in habitually active and sedentary pregnant women. *Med.Sci.Sports Exerc.* 2003. 35:1441-1446 |
| **A. Dinc, N. Kizilkaya Beji and O. Yalcin.** Effect of pelvic floor muscle exercises in the treatment of urinary incontinence during pregnancy and the postpartum period. *Int.Urogynecol.J.Pelvic Floor Dysfunct.* 2009. 20:1223-1231 |
| **A. E. Beddoe, K. A. Lee, S. J. Weiss, H. P. Kennedy and C. P. Yang.** Effects of mindful yoga on sleep in pregnant women: a pilot study. 2010. 11:363-370 |
| **A. E. Montpetit, H. Plourde, T. R. Cohen and K. G. Koski.** Modeling the impact of prepregnancy BMI, physical activity, and energy intake on gestational weight gain, infant birth weight, and postpartum weight retention. *Journal of Physical Activity & Health.* 2012. 9:1020-1029 |
| **A. E. Ruifrok, E. Althuizen, N. Oostdam, et al.** PMC4189770; The relationship of objectively measured physical activity and sedentary behaviour with gestational weight gain and birth weight. *Journal of Pregnancy.* 2014. 2014:567379 |
| **A. ElDeeb, A. A. Sabbour, K. Abd-Ghafar and W. A. Ayad.** Effect of Stabilizing Exercises Augmented by Pelvic Floor Training on Postpartum Low Back Pain. *Journal of Womens Health.* 2016. 25:A11 |
| **A. F. Adeniyi and O. O. Ogwumike.** Physical activity and energy expenditure: findings from the Ibadan Pregnant Women's Survey. 2014. 18:117-126 |
| **A. F. Saftlas, N. Logsden-Sackett, W. Wang, R. Woolson and M. B. Bracken.** Work, leisure-time physical activity, and risk of preeclampsia and gestational hypertension. *Am.J.Epidemiol.* 2004. 160:758-765 |
| **A. Fast, L. Weiss, E. J. Ducommun, E. Medina and J. G. Butler.** Low-back pain in pregnancy. Abdominal muscles, sit-up performance, and back pain. 1990. 15:28-30 |
| **A. Ferrara, M. M. Hedderson, C. L. Albright, et al.** A pregnancy and postpartum lifestyle intervention in women with gestational diabetes mellitus reduces diabetes risk factors: a feasibility randomized control trial. 2011. 34:1519-1525 |
| **A. Fraser, K. Tilling, C. Macdonald-Wallis, et al.** Associations of gestational weight gain with maternal body mass index, waist circumference, and blood pressure measured 16 y after pregnancy: The Avon Longitudinal Study of Parents and Children (ALSPAC). *Am.J.Clin.Nutr.* 2011. 93:1285-1292 |
| **A. G. Cramp and L. R. Brawley.** Moms in motion: a group-mediated cognitive-behavioral physical activity intervention. 2006. 3:23 |
| **A. G. Cramp and S. R. Bray.** Pre- and postnatal women's leisure time physical activity patterns: a multilevel longitudinal analysis. 2009. 80:403-411 |
| **A. G. El-Metwalli, A. M. Badawy, L. A. El-Baghdadi and A. El-Wehady.** Occupational physical activity and pregnancy outcome. 2001. 100:41-45 |
| **A. Garshasbi and S. Faghih Zadeh.** The effect of exercise on the intensity of low back pain in pregnant women. *International Journal of Gynaecology & Obstetrics.* 2005. 88:271-275 |
| **A. Gaston and C. A. Vamos.** Leisure-time physical activity patterns and correlates among pregnant women in Ontario, Canada. *Maternal & Child Health Journal.* 2013. 17:477-484 |
| **A. Gaston and H. Prapavessis.** Using a combined protection motivation theory and health action process approach intervention to promote exercise during pregnancy. 2014. 37:173-184 |
| **A. Gaston, A. G. Cramp and H. Prapavessis.** Pregnancy--should women put up their feet or lace up their running shoes?: Self-presentation and the exercise stereotype phenomenon during pregnancy. 2012. 34:223-237 |
| **A. Gollenberg, P. Pekow, G. Markenson, K. L. Tucker and L. Chasan-Taber.** Dietary behaviors, physical activity, and cigarette smoking among pregnant Puerto Rican women. *Am.J.Clin.Nutr.* 2008. 87:1844-1851 |
| **A. Goodwin, J. Astbury and J. McMeeken.** Pregnancy: Does it change exercise participation?. 2000. 6:15-26 |
| **A. Gradmark, J. Pomeroy, F. Renstrom, et al.** Physical activity may offset pregnancy-related insulin resistance. *Diabetologia.* 2010. 53:S276 |
| **A. Gradmark, J. Pomeroy, F. Renstrom, et al.** PMC3130709; Physical activity, sedentary behaviors, and estimated insulin sensitivity and secretion in pregnant and non-pregnant women. *BMC Pregnancy & Childbirth.* 2011. 11:44 |
| **A. Gutke, H. C. Ostgaard and B. Oberg.** Predicting persistent pregnancy-related low back pain. 2008. 33:E386-93 |
| **A. Hart, N. Morris, S. B. Osborn and H. P. Wright.** Source: CLML. 5731:14586; Effective uterine bloodflow during exercise in normal and pre-eclamptic pregnancies. *Lancet.* 1956. 271:481-484 |
| **A. Himmelmann, A. Svensson, L. Sigstrom and L. Hansson.** Predictors of blood pressure and left ventricular mass in the young: the Hypertension in Pregnancy Offspring Study. *American Journal of Hypertension.* 1994. 7:381-389 |
| **A. Hui, L. Back, S. Ludwig, et al.** Exercise and dietary intervention increases physical activity, promotes healthy diet and reduces excessive gestational weight gain in pregnant women: A randomized controlled trial in Urban community. *Diabetes.* 2011. 60:A351 |
| **A. Hui, L. Back, S. Ludwig, et al.** Lifestyle intervention on diet and exercise reduced excessive gestational weight gain in pregnant women under a randomised controlled trial. *Bjog-an International Journal of Obstetrics and Gynaecology.* 2012. 119:70-77 |
| **A. J. Agopian, P. J. Lupo, M. A. Canfield, L. E. Mitchell and Defects Prevention National Birth.** Swimming pool use and birth defect risk. *American Journal of Obstetrics & Gynecology.* 2013. 209:219.e1-219.e9 |
| **A. J. Agopian, P. J. Lupo, M. A. Canfield, L. E. Mitchell and National Birth Defects Prevention, Study.** Swimming pool use and birth defect risk. 2013. 209:219.e1-219.e9 |
| **A. J. Martin Campillo.** Desarrollo motor del periodo prenatal al primer ano de vida, relacion conla Natacion. / Motor development from the prenatal period to the first year of life, relationship with Swimming. *Comunicaciones Tecnicas.* 1992. 5-19 |
| **A. Jakobovits.** The effect of maternal physical activity on fetal breathing movements. *Arch.Gynecol.* 1983. 234:47-48 |
| **A. Jayasudha.** Effect of antenatal exercises on labour outcome among primigravid mothers. *Nurs.J.India.* 2013. 104:10-13 |
| **A. Jukic, K. Evenson, J. Daniels, A. H. Herring, A. Wilcox and K. Hartmann.** A prospective study of the association between vigorous physical activity during pregnancy and length of gestation and birthweight. *Am.J.Epidemiol.* 2010. 171:S33 |
| **A. K. Ertan, S. Schanz, H. A. Tanriverdi, R. Meyberg and W. Schmidt.** Doppler examinations of fetal and uteroplacental blood flow in AGA and IUGR fetuses before and after maternal physical exercise with the bicycle ergometer. *J.Perinat.Med.* 2004. 32:260-265 |
| **A. K. Jenum, K. R. Richardsen, S. Berntsen and K. Morkrid.** Gestational diabetes, insulin resistance and physical activity in pregnancy in a multi-ethnic population - a public health perspective. 2013. 23:45-54 |
| **A. K. Ronnberg, I. Ostlund, H. Fadl, T. Gottvall and K. Nilsson.** Intervention during pregnancy to reduce excessive gestational weight gain-a randomised controlled trial. 2015. 122:537-544 |
| **A. Karabulut, A. U. Derbent, M. Yildirim, S. Simavli and N. O. Turhan.** Evaluation of risk factors and effect of physical activity in caesarean section in nulliparous women. *Journal of Maternal-Fetal & Neonatal Medicine.* 2012. 25:1456-1459 |
| **A. Kariminia, M. E. Chamberlain, J. Keogh and A. Shea.** PMC351839; Randomised controlled trial of effect of hands and knees posturing on incidence of occiput posterior position at birth. *BMJ.* 2004. 328:490 |
| **A. Kerssen, H. W. de Valk and G. H. Visser.** Day-to-day glucose variability during pregnancy in women with Type 1 diabetes mellitus: glucose profiles measured with the Continuous Glucose Monitoring System. 2004. 111:919-924 |
| **A. Khaledan, S. Mirdar, N. S. Motahari Tabari and M. A. Shirvani.** Effect of an Aerobic Exercise Program on Fetal Growth in Pregnant Women. *HAYAT.* 2010. 16:55-64 10p |
| **A. L. Brearley, M. Sherburn, M. P. Galea and S. J. Clarke.** Pregnant women maintain body temperatures within safe limits during moderate-intensity aqua-aerobic classes conducted in pools heated up to 33 degrees Celsius: an observational study. 2015. 61:199-203 |
| **A. L. Deierlein, A. M. Siega-Riz and A. Herring.** Dietary energy density but not glycemic load is associated with gestational weight gain. 2008. 88:693-699 |
| **A. L. Deierlein, A. Siega-Riz and K. R. Evenson.** PMC3387759; Physical activity during pregnancy and risk of hyperglycemia. *Journal of Women's Health.* 2012. 21:769-775 |
| **A. L. Gollenberg, P. Pekow, E. Bertone-Johnson, P. S. Freedson, G. Markenson and L. Chasan-Taber.** Physical activity and risk of small-for-gestational-age birth among predominantly Puerto Rican women. *Maternal & Child Health Journal.* 2011. 15:49-59 |
| **A. L. Gollenberg, P. Pekow, E. R. Bertone-Johnson, P. S. Freedson, G. Markenson and L. Chasan-Taber.** Sedentary behaviors and abnormal glucose tolerance among pregnant Latina women. 2010. 42:1079-1085 |
| **A. L. Hui, L. Back, A. Reid, et al.** Effects of physical activity and dietary intakes on weight gain of pregnant women with normal and above normal prepregnancy weight. *Canadian Journal of Diabetes.* 2012. 1):S8 |
| **A. L. Hui, L. Back, S. Ludwig, et al.** PMC4287470; Effects of lifestyle intervention on dietary intake, physical activity level, and gestational weight gain in pregnant women with different pre-pregnancy Body Mass Index in a randomized control trial. *BMC Pregnancy & Childbirth.* 2014. 14:331 |
| **A. L. Hui, S. Ludwig, P. Gardiner, et al.** Exercise and dietary intervention during pregnancy results in reduced excessive gestational weight gain. *Diabetes.* 2010. Conference Publication: (var.pagings).: |
| **A. L. Hui, S. M. Ludwig, P. Gardiner, et al.** Community-based exercise and dietary intervention during pregnancy: A pilot study. *Canadian Journal of Diabetes.* 2006. 30:169-175 |
| **A. L. Vallim, M. J. Osis, J. G. Cecatti, E. P. Baciuk, C. Silveira and S. R. Cavalcante.** PMC3113331; Water exercises and quality of life during pregnancy. *Reproductive Health.* 2011. 8:14 |
| **A. Lee, J. Karpavicius, E. Gasparini and D. Forster.** Implementing a diet and exercise program for limiting maternal weight gain in obese pregnant women: A pilot study. *Australian and New Zealand Journal of Obstetrics and Gynaecology.* 2012. 52:427-432 |
| **A. Lee, J. Karpavicius, E. Gasparini and D. Forster.** Implementing a diet and exercise program for limiting maternal weight gain in obese pregnant women: a pilot study. 2012. 52:427-432 |
| **A. Lemos, A. I. de Souza, J. N. Figueiroa, J. E. Cabral-Filho and A. D. de Andrade.** Respiratory muscle strength in pregnancy. 2010. 104:1638-1644 |
| **A. Lewkowitz, B. O'Donnell, S. Nakagawa, J. Vargas, Y. Cheng and M. Zlatnik.** Social media messaging in pregnancy: How Text4Baby compares to popular smart phone applications. *Obstet.Gynecol.* 2014. 1):S249-S250 |
| **A. Liquori, G. Widener and L. Clark.** Effects of a 6-week prenatal water exercise program on physiological parameters and well-being in women with pregnancies in the 2nd-3rd trimesters: a pilot study. *Journal of the Section on Women's Health.* 2003. 27:11-19 9p |
| **A. Lynch, C. Goodman, P. L. Choy, et al.** Maternal physiological responses to swimming training during the second trimester of pregnancy. *Research in Sports Medicine.* 2007. 15:33-45 13p |
| **A. M. Jukic, D. A. Lawlor, M. Juhl, et al.** Physical activity during pregnancy and language development in offspring. *Am.J.Epidemiol.* 2012. 175:S76 |
| **A. M. Jukic, K. R. Evenson, A. H. Herring, A. J. Wilcox, K. E. Hartmann and J. L. Daniels.** NIHMS494001 PMC3749786; Correlates of physical activity at two time points during pregnancy. *Journal of Physical Activity & Health.* 2012. 9:325-335 |
| **A. M. Lynch, C. Goodman, P. L. Choy, et al.** Maternal physiological responses to swimming training during the second trimester of pregnancy. 2007. 15:33-45 |
| **A. M. Lynch, S. McDonald, E. F. Magann, et al.** Effectiveness and safety of a structured swimming program in previously sedentary women during pregnancy. *Journal of Maternal-Fetal & Neonatal Medicine.* 2003. 14:163-169 |
| **A. M. Paolone, M. Shangold, D. Paul, J. Minnitti and S. Weiner.** Fetal heart rate measurement during maternal exercise--avoidance of artifact. *Medicine & Science in Sports & Exercise.* 1987. 19:605-609 |
| **A. M. Petersen, T. L. Leet and R. C. Brownson.** Correlates of physical activity among pregnant women in the United States. *Medicine & Science in Sports & Exercise.* 2005. 37:1748-1753 6p |
| **A. M. Stuebe, E. Oken and M. W. Gillman.** Associations of diet and physical activity during pregnancy with risk for excessive gestational weight gain. *Am.J.Obstet.Gynecol.* 2009. 201:58.e1-58.e8 |
| **A. M. Stuebe, E. Oken, M. W. Gillman, Alison M. Stuebe, Emily Oken and Matthew W. Gillman.** Associations of diet and physical activity during pregnancy with risk for excessive gestational weight gain. *American Journal of Obstetrics & Gynecology.* 2009. 201:58.e8 |
| **A. M. Wallace, D. B. Boyer, A. Dan and K. Holm.** Aerobic exercise, maternal self-esteem, and physical discomforts during pregnancy. 1986. 31:255-262 |
| **A. M. Z. Jukic, K. R. Evenson, A. H. Herring, A. J. Wilcox, K. E. Hartmann and J. L. Daniels.** Correlates of physical activity at two time points during pregnancy. 2012. 9:325-335 |
| **A. MacPhail, G. A. Davies, R. Victory and L. A. Wolfe.** Maximal exercise testing in late gestation: fetal responses. *Obstetrics & Gynecology.* 2000. 96:565-570 |
| **A. McGiveron, S. Foster, J. Pearce, M. A. Taylor, S. McMullen and S. Langley-Evans.** Limiting antenatal weight gain improves maternal health outcomes in severely obese pregnant women: findings of a pragmatic evaluation of a midwife-led intervention. *Journal of Human Nutrition & Dietetics.* 2015. 28 Suppl 1:29-37 |
| **A. Merkx, M. Ausems, L. Bude, R. de Vries and M. J. Nieuwenhuijze.** Weight gain in healthy pregnant women in relation to pre-pregnancy BMI, diet and physical activity. *Midwifery.* 2015. 31:693-701 |
| **A. Murtezani, M. Pacarada, Z. Ibraimi, A. Nevzati and N. Abazi.** The impact of exercise during pregnancy on neonatal outcomes: a randomized controlled trial. *Journal of Sports Medicine & Physical Fitness.* 2014. 54:802-808 |
| **A. Nakagaki, T. Inami, T. Minoura, R. Baba, S. Iwase and M. Sato.** Differences in autonomic neural activity during exercise between the second and third trimesters of pregnancy. *Journal of Obstetrics & Gynaecology Research.* 2016. 28:28 |
| **A. Nieto, R. Matorras, M. Serra, P. Valenzuela and J. Molero.** Multivariate analysis of determinants of fetal growth retardation. *European Journal of Obstetrics, Gynecology, & Reproductive Biology.* 1994. 53:107-113 |
| **A. Opala-Berdzik, B. Bacik, A. Markiewicz, et al.** Comparison of static postural stability in exercising and non-exercising women during the perinatal period. *Medical Science Monitor.* 2014. 20:1865-1870 |
| **A. P. Heenan and L. A. Wolfe.** Plasma acid-base regulation above and below ventilatory threshold in late gestation. *J.Appl.Physiol.* 2000. 88:149-157 |
| **A. P. Heenan and L. A. Wolfe.** Plasma osmolality and the strong ion difference predict respiratory adaptations in pregnant and nonpregnant women. 2003. 81:839-847 |
| **A. P. Heenan, L. A. Wolfe and G. A. Davies.** Maximal exercise testing in late gestation: maternal responses. *Obstetrics & Gynecology.* 2001. 97:127-134 |
| **A. P. Heenan, L. A. Wolfe, G. A. Davies and M. J. McGrath.** Effects of human pregnancy on fluid regulation responses to short-term exercise. *J.Appl.Physiol.* 2003. 95:2321-2327 |
| **A. P. Koemeester, J. P. Broersen and P. E. Treffers.** Physical work load and gestational age at delivery. 1995. 52:313-315 |
| **A. P. Koemeester, J. P. Broersen and P. E. Treffers.** PMC1128222; Physical work load and gestational age at delivery. *Occupational & Environmental Medicine.* 1995. 52:313-315 |
| **A. R. A. Adegboye, S. Rossner, M. Neovius, P. M. C. Lourenço and Y. Linné.** Relationships between prenatal smoking cessation, gestational weight gain and maternal lifestyle characteristics. 2010. 23:29-35 7 |
| **A. Rakhshani, R. Nagarathna, R. Mhaskar, A. Mhaskar, A. Thomas and S. Gunasheela.** PMC4320907; Effects of yoga on utero-fetal-placental circulation in high-risk pregnancy: a randomized controlled trial. *Advances in Preventive Medicine.* 2015. 2015:373041 |
| **A. Rakhshani, S. Maharana, N. Raghuram, H. R. Nagendra and P. Venkatram.** Effects of integrated yoga on quality of life and interpersonal relationship of pregnant women. *Quality of life research.* 2010. 19:1447-1455 |
| **A. Restall, R. S. Taylor, J. M. Thompson, et al.** PMC4065732; Risk factors for excessive gestational weight gain in a healthy, nulliparous cohort. *Journal of Obesity.* 2014. 2014:148391 |
| **A. Robledo-Colonia, N. Sandoval-Restrepo, Y. Mosquera-Valderrama, C. Escobar-Hurtado and R. Ramirez-Velez.** Aerobic exercise training during pregnancy reduces depressive symptoms in nulliparous women: a randomised trial. *Journal of Physiotherapy.* 2012. 58:9-15 |
| **A. Rodriguez and G. Bohlin.** Psychosocial predictors of smoking and exercise during pregnancy. 2000. 18:203-223 |
| **A. S. Cavalli and T. Tanaka.** PMC2723239; Relationship between maternal physical activities and preterm birth. *Environmental Health & Preventive Medicine.* 2001. 6:74-81 |
| **A. S. Cavalli and T. Tanaka.** PMC2723549; Maternal leisure-time physical activities are not determinant risk factors of low birthweight babies: A cross-sectional study of 1,714 pregnant women. *Environmental Health & Preventive Medicine.* 2000. 5:72-80 |
| **A. S. Tenforde, K. E. Toth, E. Langen, M. Fredericson and K. L. Sainani.** PMC4332642 Available on 03/01/16]; Running habits of competitive runners during pregnancy and breastfeeding. *Sports Health.* 2015. 7:172-176 |
| **A. Sijtsma, P. J. J. Sauer and E. Corpeleijn.** Parental correlations of physical activity and body mass index in young children- the GECKO Drenthe cohort. *International Journal of Behavioral Nutrition and Physical Activity.* 2015. 12: |
| **A. Spinillo, E. Capuzzo, F. Baltaro, G. Piazza, S. Nicola and A. Iasci.** The effect of work activity in pregnancy on the risk of fetal growth retardation. *Acta Obstet.Gynecol.Scand.* 1996. 75:531-536 |
| **A. Suputtitada, T. Wacharapreechanont and P. Chaisayan.** Effect of the "sitting pelvic tilt exercise" during the third trimester in primigravidas on back pain. *Journal of the Medical Association of Thailand.* 2002. 85 Suppl 1:S170-9 |
| **A. U. Derbent, A. Karabulut, M. Yildirim, S. A. Simavli and N. O. Turhan.** Evaluation of risk factors in cesarean delivery among multiparous women with a history of vaginal delivery. 2012. 13:15-20 |
| **A. V. M. Arizabaleta, L. O. Buitrago, de Plata, A. C. A., M. M. Escudero and R. Ram**. Aerobic exercise during pregnancy improves health-related quality of life: A randomised trial. 2010. 56:253-258 |
| **A. W. Bingham.** The prevention of obstetric complications by diet and exercise. 1932. 23:38-47 |
| **A. Williams, T. Reilly, I. Campbell and J. Sutherst.** Investigation of changes in responses to exercise and in mood during pregnancy. 1988. 31:1539-1549 |
| **A. Wojtyla, L. Kapka-Skrzypczak, P. Bilinski and P. Paprzycki.** Physical activity among women at reproductive age and during pregnancy (Youth Behavioural Polish Survey - YBPS and Pregnancy-related Assessment Monitoring Survay - PrAMS) - epidemiological population studies in Poland during the period 2010-2011. *Annals of Agricultural and Environmental Medicine.* 2011. 18:365-374 |
| **A. Wojtyla, L. Kapka-Skrzypczak, P. Paprzycki, M. Skrzypczak and P. Bilinski.** Epidemiological studies in Poland on effect of physical activity of pregnant women on the health of offspring and future generations - adaptation of the hypothesis development origin of health and diseases. *Annals of Agricultural & Environmental Medicine.* 2012. 19:315-326 |
| **Akhgar Ghassabian, Rajeshwari Sundaram, Amanda Wylie, Erin Bell, Scott C. Bello and Edwina Yeung.** Maternal medical conditions during pregnancy and gross motor development up to age 24 months in the Upstate KIDS study. *Developmental Medicine & Child Neurology.* 2016. 58:728-734 |
| **Akihito Takeuchi, Takashi Yorifuji, Kyohei Takahashi, et al.** Neurodevelopment in full-term small for gestational age infants: A nationwide japanese population-based study. *Brain Dev.* 2016. 38:529-537 |
| **Alison Tovar, Lauren B. Guthrie, Deborah Platek, Alison Stuebe, Sharon J. Herring and Emily Oken.** Modifiable predictors associated with having a gestational weight gain goal. 2011. 15:1119-1126 |
| **Anca Gaston, Philip M. Wilson, Diane E. Mack, Stephanie Elliot and Harry Prapavessis.** Understanding physical activity behavior and cognitions in pregnant women: An application of self-determination theory. 2013. 14:405-412 |
| **André Michael Toschke, Simon Rückinger, Eva Böhler and Rüdiger Von Kries.** Adjusted population attributable fractions and preventable potential of risk factors for childhood obesity. 2007. 10:902-906 5 |
| **Anja Podlesnik Fetih, Mateja Videmšek, Vislava Globevnik Velikonja, Eda Bokal Vrtačnik and Damir Karpljuk.** The state of mind of less physically active and regularly physically active women in the second trimester of their pregnancies. / duševní stay málo a pravidelnĕ tĕlesnĕ akitvních žen ve druhém tremestru tĕhotenstÍ. 2008. 38:37-44 |
| **Anonymous**. Acute Maternal and Fetal Effects of Exercise in Pregnancy. *Clinical Trials.* 2011. |
| **Anonymous**. Descriptive Epidemiology of Objectively Measured Walking Among US Pregnant Women: National Health and Nutrition Examination Survey, 2005-2006. 2015. 12:1-6 6 |
| **Anonymous**. Effectiveness of Video Messaging About Diet, Exercise and Weight Gain in Pregnancy in Regional and National Samples. *Clinical Trials.* 2015. |
| **Anonymous**. Effects of a Physical Exercise Program on Microcirculation and Pregnancy Outcomes in Obese Pregnant Women. *Clinical Trials.* 2015. |
| **Anonymous**. Effects on postpartum weight retention after antenatal lifestyle intervention - a secondary analysis of a randomized controlled trial. *Acta Obstet.Gynecol.Scand.* 2016. 95:999-1007 |
| **Anonymous**. Exercise in pregnancy does not increase preterm birth risk. *Clinical Advisor.* 2016. 19:16 |
| **Anonymous**. Exercise in Pregnancy Evaluative Controlled Study. *Clinical Trials.* 2015. |
| **Anonymous**. Exercise Training in Pregnancy for Obese Mothers. *Clinical Trials.* 2010. |
| **Anonymous**. Fit For Delivery: A Study of the Effect of Exercise Sessions and Nutritional Counselling on Pregnancy Outcome. *Clinical Trials.* 2009. |
| **Anonymous**. Fitness programs benefit mothers-to-be, heart patients. *Health Prog.* 1985. 66:74-75 |
| **Anonymous**. Maternal condition and exercise during pregnancy benefit the unborn well being and labor. 2008. 26:51-58 8 |
| **Anonymous**. Pelvic floor muscle exercises. 2001. 87:650 |
| **Anonymous**. Pregnant women advised to consider exercise risks. (Les femmes enceintes doivent prendre en compte les dangers du sport). *Physician & Sportsmedicine.* 1982. 10:27 |
| **Anonymous**. Pregnant women who swim at reduced risk of preterm birth. *Nursing Standard.* 2010. 24:17 |
| **Anonymous**. Role of Maternal Physical Exercise on Spontaneous Labor Onset. *Clinical Trials.* 2015. |
| **Anonymous**. What is the effect of regular group exercise on maternal psychological outcomes and common pregnancy complaints? An assessor blinded RCT. 2016. 32:81-86 6 |
| **Arati Mahishale and Shobhana Patted.** Effectiveness of Tailor Made Exercise Intervention for Low Back Pain and Pelvic Pain during Pregnancy - A Randomized Controlled Trial. 2014. 8:143-148 6 |
| **Avaya Banerjee, V. Mahalakshmi and R. Baranitharan.** Effect of Antenatal Exercise Program with and without Abdominal Strengthening Exercises on Diastasis Rectus Abdominis - A Post Partum Follow Up. 2013. 7:123-126 4 |
| **B. A. Lewis, B. C. Martinson, N. E. Sherwood and M. D. Avery.** A pilot study evaluating a telephone-based exercise intervention for pregnant and postpartum women. *J.Midwifery Womens Health.* 2011. 56:127-131 |
| **B. A. Meyer and J. R. Daling.** Activity level of mother's usual occupation and low infant birth weight. *Journal of Occupational Medicine.* 1985. 27:841-847 |
| **B. A. Polley, R. R. Wing and C. J. Sims.** Randomized controlled trial to prevent excessive weight gain in pregnant women. 2002. 26:1494-1502 |
| **B. B. Price, S. B. Amini and K. Kappeler.** Exercise in pregnancy: effect on fitness and obstetric outcomes-a randomized trial. *Medicine & Science in Sports & Exercise.* 2012. 44:2263-2269 |
| **B. Banerjee, T. K. Dey and P. Chatterjee.** Estimation of risk of pregnancy wastage due to lifting of heavy weight during pregnancy. *Indian Journal of Occupational and Environmental Medicine.* 2002. 6:13-15 |
| **B. Banerjee, T. K. Dey and P. Chatterjee.** Work related physical exertion and spontaneous abortion. *Indian J.Public Health.* 2005. 49:248-249 |
| **B. Bennett and O. D. Ratnoff.** Changes in antihemophilic factor (AHF, factor 8) procoagulant activity and AHF-like antigen in normal pregnancy, and following exercise and pneumoencephalography. *J.Lab.Clin.Med.* 1972. 80:256-263 |
| **B. Chakaravertty, K. Parkavi, S. A. Coumary and A. J. Felix.** Antepartum cardiorespiratory fitness (CRF) quantification by estimation of maximal oxygen consumption (Vo2 max) in pregnant South Indian women. 2012. 110:214-217 |
| **B. Eskenazi, L. Fenster, S. Wight, P. English, G. C. Windham and S. H. Swan.** Physical exertion as a risk factor for spontaneous abortion. 1994. 5:6-13 |
| **B. Feiner, R. Weksler, G. Ohel and S. Degani.** The influence of maternal exercise on placental blood flow measured by Simultaneous Multigate Spectral Doppler Imaging (SM-SDI). *Ultrasound in Obstetrics & Gynecology.* 2000. 15:498-501 |
| **B. G. Armstrong, A. D. Nolin and A. D. McDonald.** PMC1009753; Work in pregnancy and birth weight for gestational age. *Br.J.Ind.Med.* 1989. 46:196-199 |
| **B. Hackley, H. P. Kennedy, D. C. Berry and G. D. Melkus.** A mixed-methods study on factors influencing prenatal weight gain in ethnic-minority women. 2014. 59:388-398 |
| **B. L. Rooney, C. W. Schauberger and M. A. Mathiason.** Impact of perinatal weight change on long-term obesity and obesity-related illnesses. 2005. 106:1349-1356 |
| **B. Laraia, L. Messer, K. Evenson and J. S. Kaufman.** PMC2232039; Neighborhood factors associated with physical activity and adequacy of weight gain during pregnancy. *Journal of Urban Health.* 2007. 84:793-806 |
| **B. Longo-Mbenza, K. B. Tshimanga, B. Buassa-bu-Tsumbu and M. J. Kabangu.** Diets rich in vegetables and physical activity are associated with a decreased risk of pregnancy induced hypertension among rural women from Kimpese, DR Congo. *Nigerian Journal of Medicine: Journal of the National Association of Resident Doctors of Nigeria.* 2008. 17:265-269 |
| **B. Melton, E. Marshall, H. Bland, M. Schmidt and W. K. Guion.** American rural women's exercise self-efficacy and awareness of exercise benefits and safety during pregnancy. 2013. 15:468-473 |
| **B. Neme, I. Behle and A. U. Dos Santos.** Effects of exercise test on the fetal heart in pregnancies complicated by hypertensive syndrome. Portuguese]. *Maternidade e Infancia.* 1973. 32:323-330 |
| **B. Richardson, K. Campbell, L. Carmichael and J. Patrick.** Effects of external physical stimulation on fetuses near term. *Obstet.Gynecol.* 1981. 139:344-352 |
| **B. S. Fjeldsoe, Y. D. Miller and A. L. Marshall.** MobileMums: a randomized controlled trial of an SMS-based physical activity intervention. 2010. 39:101-111 |
| **B. Sandstrom.** Adjustments of the circulation to orthostatic reaction and physical exercise during the first trimester of primipregnancy. 1974. 53:1-5 |
| **B. Sangsawang and N. Sangsawang.** Is a 6-week supervised pelvic floor muscle exercise program effective in preventing stress urinary incontinence in late pregnancy in primigravid women?: a randomized controlled trial. *European Journal of Obstetrics, Gynecology, & Reproductive Biology.* 2016. 197:103-110 |
| **B. Sangsawang and Y. Serisathien.** Effect of pelvic floor muscle exercise programme on stress urinary incontinence among pregnant women. *J.Adv.Nurs.* 2012. 68:1997-2007 |
| **B. Sternfeld, C. P. Quesenberry, B. Eskenazi and L. A. Newman.** Exercise during pregnancy and pregnancy outcome. / Pratique de l ' exercice physique pendant la grossesse et son incidence sur la grossesse. *Medicine & Science in Sports & Exercise.* 1995. 27:634-640 |
| **B. W. Alderman, H. Zhao, V. L. Holt, D. H. Watts and S. A. A. Beresford.** Maternal physical activity in pregnancy and infant size for gestational age. *Ann.Epidemiol.* 1998. 8:513-519 |
| **Brad Schoenfeld and Gul Tiryaki-Sonmez.** Overcoming Psychosocial Barriers to Maternal Exercise: Intervention Strategies to Improve Participation and Adherence. 2011. 3:61-66 |
| **Brazil University of Campinas.** Physical Exercise Influence Among Overweight and Obese Pregnant Women. 2010. |
| **C. A. Collings, L. B. Curet and J. P. Mullin.** Maternal and fetal responses to a maternal aerobic exercise program. *American Journal of Obstetrics & Gynecology.* 1983. 145:702-707 |
| **C. A. Guzman and R. Caplan.** Cardiorespiratory response to exercise during pregnancy. *Obstet.Gynecol.* 1970. 108:600-605 |
| **C. A. Guzman, R. Caplan and M. R. Becklake.** Cardiorespiratory response to exercise during pregnancy. 1969. 28:786-& |
| **C. A. Hickey, S. P. Cliver, F. X. Mulvihill, S. F. McNeal, H. J. Hoffman and R. L. Goldenberg.** Employment-related stress and preterm delivery: a contextual examination. 1995. 110:410-418 |
| **C. A. Nielsen, I. Sigsgaard, M. Olsen, M. Tolstrup, B. Danneskiold-Samsoee and J. E. Bock.** Trainability of the pelvic floor. A prospective study during pregnancy and after delivery. 1988. 67:437-440 |
| **C. A. Snapp and S. K. Donaldson.** Gestational diabetes mellitus: physical exercise and health outcomes. 2008. 10:145-155 |
| **C. A. Snijder, T. Brand, V. Jaddoe, et al.** Physically demanding work, fetal growth and the risk of adverse birth outcomes. The Generation R Study. *Occupational & Environmental Medicine.* 2012. 69:543-550 |
| **C. A. Vamos, S. Flory, H. Sun, et al.** Do Physical Activity Patterns Across the Lifecourse Impact Birth Outcomes?. 2015. 19:1775-1782 |
| **C. A. Vinter, D. M. Jensen, P. Ovesen, H. Beck-Nielsen and J. S. Jorgensen.** The LiP (Lifestyle in Pregnancy) study: A randomized controlled trial of lifestyle intervention in 360 obese pregnant women. *Diabetes Care.* 2011. 34:2502-2507 |
| **C. Abeysena and P. Jayawardana.** Sleep deprivation, physical activity and low income are risk factors for inadequate weight gain during pregnancy: a cohort study. 2011. 37:734-740 |
| **C. Abeysena, P. Jayawardana and A. Seneviratne Rde.** Effect of psychosocial stress and physical activity on preterm birth: a cohort study. *Journal of Obstetrics & Gynaecology Research.* 2010. 36:260-267 |
| **C. Albright, J. E. Maddock and C. R. Nigg.** Physical activity before pregnancy and following childbirth in a multiethnic sample of healthy women in Hawaii. 2005. 42:95-110 |
| **C. Amezcua-Prieto, P. Lardelli-Claret, R. Olmedo-Requena, J. Mozas-Moreno, A. Bueno-Cavanillas and J. J. Jimenez-Moleon.** Compliance with leisure-time physical activity recommendations in pregnant women. 2011. 90:245-252 |
| **C. B. Eaton, J. Maccani, G. Agha, et al.** Adverse early life exposures and carotid atherosclerosis in midlife: Leap study. *Circulation.* 2014. 129: |
| **C. B. Olsson, L. Nilsson-Wikmar and W. J. Grooten.** Determinants for lumbopelvic pain 6 months postpartum. 2012. 34:416-422 |
| **C. B. Rudra, T. K. Sorensen, D. A. Luthy and M. A. Williams.** A prospective analysis of recreational physical activity and preeclampsia risk. *Med.Sci.Sports Exerc.* 2008. 40:1581-1588 |
| **C. Bish, S. Chu, C. Shapiro-Mendoza, A. Sharma and H. M. Blanck.** Trying to lose or maintain weight during pregnancy -- United States, 2003. 2009. 13:286-292 7 |
| **C. Botkin and C. E. Driscoll.** Maternal aerobic exercise: newborn effects. *Fam.Pract.Res.J.* 1991. 11:387-393 |
| **C. C. D. Perkins, J. M. Pivarnik, N. Paneth and A. D. Stein.** Physical activity and fetal growth during pregnancy. *Obstet.Gynecol.* 2007. 109:81-87 |
| **C. C. M. Röst, J. Jacqueline, A. Kaiser, A. P. Verhagen and B. W. Koes.** Pelvic pain during pregnancy: a descriptive study of signs and symptoms of 870 patients in primary care. 2004. 29:2567-2572 6 |
| **C. Coll, M. Domingues, I. Santos, A. Matijasevich, B. L. Horta and P. C. Hallal.** Changes in Leisure-Time Physical Activity From the Prepregnancy to the Postpartum Period: 2004 Pelotas (Brazil) Birth Cohort Study. *Journal of Physical Activity & Health.* 2016. 13:361-365 |
| **C. Collings and L. B. Curet.** Fetal heart rate response to maternal exercise. *American Journal of Obstetrics & Gynecology.* 1985. 151:498-501 |
| **C. D. Peterson, M. Haas and W. T. Gregory.** A pilot randomized controlled trial comparing the efficacy of exercise, spinal manipulation, and neuro emotional technique for the treatment of pregnancy-related low back pain. 2012. 20:18 |
| **C. de Oliveira, M. A. Lopes, Carla Longo e Pereira, L. and M. Zugaib.** Effects of pelvic floor muscle training during pregnancy. 2007. 62:439-446 |
| **C. Dominguez de Costa, A. Lerdo de Tejada, P. Eisenberg de Smoler, et al.** [Decrease of Ac. 5-HIA excretion in urine induced by exercise in pregnant women]. 1978. 44:347-353 |
| **C. E. Mbada, O. E. Adebayo, A. B. Adeyemi, et al.** Knowledge and Attitude of Nigerian Pregnant Women towards Antenatal Exercise: A Cross-Sectional Survey. 2014. 2014:260539 |
| **C. E. Mbada, O. E. Adebayo, T. O. Awotidebe, et al.** Practice and pattern of antenatal and postnatal exercise among Nigerian women: A cross-sectional study. 2015. 3:93-98 |
| **C. Elliott, S. Houghton and S. Langsford.** The use of visual prompts to increase kegel exercise performance in pregnant women: A case study. 1997. 14:231-235 |
| **C. F. Lee, F. M. Hwang, H. M. Lin, L. K. Chi and L. Y. Chien.** The Physical Activity Patterns of Pregnant Taiwanese Women. *Journal of Nursing Research.* 2016. 24:291-299 |
| **C. F. Lee, I. C. Chiang, F. M. Hwang, L. K. Chi and H. M. Lin.** Using the Theory of Planned Behavior to predict pregnant women's intention to engage in regular exercise. *Midwifery.* 2016. 42:80-86 |
| **C. F. Yan, Y. C. Hung, M. L. Gau and K. C. Lin.** Effects of a stability ball exercise programme on low back pain and daily life interference during pregnancy. *Midwifery.* 2014. 30:412-419 |
| **C. Ferreira, H. Dutra, L. Dias, et al.** Heart rate and blood pressure in response to pelvic floor muscle training during pregnancy. *Int.Urogynecol.J.Pelvic Floor Dysfunct.* 2011. 22:S1471-S1472 |
| **C. Fleten, H. Stigum, P. Magnus and W. Nystad.** Exercise during pregnancy, maternal prepregnancy body mass index, and birth weight. *Obstetrics & Gynecology.* 2010. 115:331-337 |
| **C. G. Dominguez, P. E. De Smoler, J. Armas Dominguez, S. Karchmer and D. Skromne.** Electrocardiography, stress and the third pregnancy trimester]. *Arch.Inst.Cardiol.Mex.* 1976. 46:74-81 |
| **C. H. Chuang, M. R. Stengel, S. W. Hwang, D. Velott, K. H. Kjerulff and J. L. Kraschnewski.** Behaviours of overweight and obese women during pregnancy who achieve and exceed recommended gestational weight gain. 2014. 8:e577-83 |
| **C. H. Ferreira, L. M. Naldoni, S. Ribeiro Jdos, M. C. Meirelles, C. Cavalli Rde and K. Bo.** Maternal blood pressure and heart rate response to pelvic floor muscle training during pregnancy. 2014. 93:678-683 |
| **C. J. Homer, S. A. Beresford, S. A. James, E. Siegel and S. Wilcox.** Work-related physical exertion and risk of preterm, low birthweight delivery. *Paediatr.Perinat.Epidemiol.* 1990. 4:161-174 |
| **C. J. Spaaij, J. M. van Raaij, L. C. de Groot, van der Heijden, L. J., H. A. Boekholt and J. G. Hautvast.** No changes during pregnancy in the net cost of cycling exercise. 1994. 48:513-521 |
| **C. J. Vladutiu, K. R. Evenson and S. W. Marshall.** Physical Activity and Injuries During Pregnancy. *Journal of Physical Activity & Health.* 2010. 7:761-769 |
| **C. Kim, L. N. McEwen, E. C. Kieffer, W. H. Herman and J. D. Piette.** NIHMS614289 PMC4139034; Self-efficacy, social support, and associations with physical activity and body mass index among women with histories of gestational diabetes mellitus. *Diabetes Educ.* 2008. 34:719-728 |
| **C. Kim, M. Draska, M. L. Hess, E. J. Wilson and C. R. Richardson.** NIHMS614297 PMC4139030; A web-based pedometer programme in women with a recent history of gestational diabetes. *Diabetic Med.* 2012. 29:278-283 |
| **C. L. Butler, M. A. Williams, T. K. Sorensen, I. O. Frederick and W. M. Leisenring.** Relation between maternal recreational physical activity and plasma lipids in early pregnancy. *Am.J.Epidemiol.* 2004. 160:350-359 |
| **C. L. Harrison, C. B. Lombard and H. J. Teede.** PMC4221718; Limiting postpartum weight retention through early antenatal intervention: the HeLP-her randomised controlled trial. *International Journal of Behavioral Nutrition & Physical Activity.* 2014. 11:134 |
| **C. L. Harrison, C. B. Lombard and H. J. Teede.** Understanding early pregnancy health behaviours among overweight and obese women at risk of gestational diabetes mellitus. *Obesity Research and Clinical Practice.* 2011. 5:S27 |
| **C. L. Harrison, C. B. Lombard, B. J. Strauss and H. J. Teede.** Optimizing healthy gestational weight gain in women at high risk of gestational diabetes: a randomized controlled trial. *Obesity.* 2013. 21:904-909 |
| **C. L. Harrison, R. G. Thompson, H. J. Teede and C. B. Lombard.** Measuring physical activity during pregnancy. *International Journal of Behavioral Nutrition and Physical Activity.* 2011. 8: |
| **C. L. Martin and L. R. Brunner Huber.** Physical activity and hypertensive complications during pregnancy: findings from 2004 to 2006 North Carolina Pregnancy Risk Assessment Monitoring System. 2010. 37:202-210 |
| **C. L. Nesler, S. L. Hassett, S. Cary and J. Brooke.** Effects of supine exercise on fetal heart rate in the second and third trimesters. *Am.J.Perinatol.* 1988. 5:159-163 |
| **C. M. Chiarello, L. A. Falzone, K. E. McCaslin, M. N. Patel and K. R. Ulery.** The effects of an exercise program on diastasis recti abdominis in pregnant women [corrected] [published erratum appears in *J womens health phys ther* 2005;29(3):76]. 2005. 29:11-16 6 |
| **C. M. Cottrill, J. M. Kotchen, G. Guthrie and T. Kotchen.** Cardiovascular responses to exercise following adolescent hypertensive pregnancy. *Journal of Adolescent Health Care.* 1980. 1:91-95 |
| **C. M. Devine, C. F. Bove and C. M. Olson.** Continuity and change in women's weight orientations and lifestyle practices through pregnancy and the postpartum period: the influence of life course trajectories and transitional events. 2000. 50:567-582 |
| **C. M. Olson and M. S. Strawderman.** Modifiable behavioral factors in a biopsychosocial model predict inadequate and excessive gestational weight gain. 2003. 103:48-54 |
| **C. M. Olson, M. S. Strawderman, P. S. Hinton and T. A. Pearson.** Gestational weight gain and postpartum behaviors associated with weight change from early pregnancy to 1 y postpartum. *International Journal of Obesity & Related Metabolic Disorders: Journal of the International Association for the Study of Obesity.* 2003. 27:117-127 |
| **C. M. Sampselle, J. M. Miller, B. L. Mims, J. O. Delancey, J. A. Ashton-Miller and C. L. Antonakos.** Effect of pelvic muscle exercise on transient incontinence during pregnancy and after birth. 1998. 91:406-412 |
| **C. Mattocks, A. Ness, K. Deere, et al.** Early life determinants of physical activity in 11 to 12 year olds: cohort study. 2008. 336:26-29 |
| **C. McParlin, S. C. Robson, P. W. G. Tennant, et al.** Objectively measured physical activity during pregnancy: A study in obese and overweight women. *BMC Pregnancy and Childbirth.* 2010. 10: |
| **C. N. Spracklen, K. K. Ryckman, E. W. Triche and A. F. Saftlas.** Physical Activity During Pregnancy and Subsequent Risk of Preeclampsia and Gestational Hypertension: A Case Control Study. *Maternal & Child Health Journal.* 2016. 20:1193-1202 |
| **C. Nav**. Analizando la relación entre el aumento del peso fetal y la realización de ejercicio físico. / exploring the relationship between the fetusweight gain and the practice of physical activity. *Journal of Sport & Health Research.* 2013. 5:319-322 |
| **C. Nobles, B. H. Marcus, E. J. Stanek 3, et al.** NIHMS656730 Available on 05/01/16] PMC4418021 Available on 05/01/16]; Effect of an exercise intervention on gestational diabetes mellitus: a randomized controlled trial. *Obstetrics & Gynecology.* 2015. 125:1195-1204 |
| **C. P. Ribeiro and H. Milanez.** Knowledge, attitude and practice of women in Campinas, Sao Paulo, Brazil with respect to physical exercise in pregnancy: a descriptive study. 2011. 8:31 |
| **C. Pavlou, T. Chard, J. Landon and A. T. Letchworth.** Circulating levels of human placental lactogen in late pregnancy: the effect of glucose loading, smoking and exercise. 1973. 3:45-49 |
| **C. R. Beckmann and C. A. Beckmann.** Effect of a structured antepartum exercise program on pregnancy and labor outcome in primiparas. *J.Reprod.Med.* 1990. 35:704-709 |
| **C. R. Holroyd, N. C. Harvey, S. R. Crozier, et al.** EMS53569 PMC3800076; Placental size at 19 weeks predicts offspring bone mass at birth: findings from the Southampton Women's Survey. *Placenta.* 2012. 33:623-629 |
| **C. Ruissen, W. Jager, M. von Drongelen and H. Hoogland.** The influence of maternal exercise on the pulsatility index of the umbilical artery blood velocity waveform. *European Journal of Obstetrics, Gynecology, & Reproductive Biology.* 1990. 37:1-6 |
| **C. S. Deshpande, A. Rakhshani, R. Nagarathna, et al.** Yoga for high-risk pregnancy: a randomized controlled trial.[Erratum appears in Ann Med Health Sci Res. 2014 Nov;4(6):978 Note: Rakshani, A [corrected to Rakhshani, A]]. 2013. 3:341-344 |
| **C. S. Harrod, L. Chasan-Taber, R. M. Reynolds, et al.** NIHMS600800 Available on 08/01/15] PMC4111108 Available on 08/01/15]; Physical activity in pregnancy and neonatal body composition: the Healthy Start study. *Obstetrics & Gynecology.* 2014. 124:257-264 |
| **C. S. Harrod, L. Chasan-Taber, R. M. Reynolds, et al.** Physical Activity during Pregnancy and Neonatal Fat Mass: The Healthy Start Study. *Diabetes.* 2014. 63:A42 |
| **C. S. Rabkin, H. R. Anderson, J. M. Bland, O. G. Brooke, G. Chamberlain and J. L. Peacock.** Maternal activity and birth weight: a prospective, population-based study. *Am.J.Epidemiol.* 1990. 131:522-531 |
| **C. Savi, G. Milic-Emili and E. De Minicis.** [The physiology of muscullar exercise in women at the termination of pregnancy]. 1959. 58:403-412 |
| **C. Schou Andersen, M. Juhl, M. Gamborg, T. I. Sorensen and E. A. Nohr.** PMC3324144; Maternal Recreational Exercise during Pregnancy in relation to Children's BMI at 7 Years of Age. *International Journal of Pediatrics.* 2012. 2012:920583 |
| **C. Schou Andersen, M. Juhl, M. Gamborg, T. I. Sorensen and E. A. Nohr.** Maternal Recreational Exercise during Pregnancy in relation to Children's BMI at 7 Years of Age. 2012. 2012:920583 |
| **C. Silveira, B. G. Pereira, J. G. Cecatti, S. R. Cavalcante and R. I. Pereira.** PMC2936287; Fetal cardiotocography before and after water aerobics during pregnancy. *Reproductive Health.* 2010. 7:23 |
| **C. Taves, J. Charteris and J. C. Wall.** The kinematics of treadmill walking during pregnancy. *Physiotherapy Canada.* 1982. 34:321-324 |
| **C. Tragea, G. P. Chrousos, E. C. Alexopoulos and C. Darviri.** A randomized controlled trial of the effects of a stress management programme during pregnancy. 2014. 22:203-211 |
| **C. W. Burnett.** The value of antenatal exercises. 1956. 63:40-57 |
| **C. W. Ko, P. G. Napolitano, S. P. Lee, S. D. Schulte, M. A. Ciol and S. A. Beresford.** Physical activity, maternal metabolic measures, and the incidence of gallbladder sludge or stones during pregnancy: a randomized trial. *Am.J.Perinatol.* 2014. 31:39-48 |
| **C. W. Ko, P. G. Napolitano, S. P. Lee, S. D. Schulte, M. A. Ciol and S. A. Beresford.** Physical activity, maternal metabolic measures, and the incidence of gallbladder sludge or stones during pregnancy: a randomized trial. 2014. 31:39-48 |
| **C. W. Waage, I. Mdala, A. K. Jenum, T. M. Michelsen, K. I. Birkeland and L. Sletner.** Ethnic differences in blood pressure from early pregnancy to postpartum: a Norwegian cohort study. *J.Hypertens.* 2016. 34:1151-1159 |
| **C. Wang, W. Zhu, Y. Wei, H. Feng, R. Su and H. Yang.** PMC4603976; Exercise intervention during pregnancy can be used to manage weight gain and improve pregnancy outcomes in women with gestational diabetes mellitus. *BMC Pregnancy & Childbirth.* 2015. 15:255 |
| **C. Ward-Ritacco, M. S. Poudevigne and P. J. O'Connor.** Muscle strengthening exercises during pregnancy are associated with increased energy and reduced fatigue. *Journal of Psychosomatic Obstetrics & Gynecology.* 2016. 37:68-72 |
| **C. Wharton and M. J. Benton.** DataBase: research and evaluation results. Resistance exercise decreases the need for insulin in overweight women with gestational diabetes mellitus. *American Journal of Health Promotion.* 2006. 20:441-442 2p |
| **C. Woldringh, M. van den Wijngaart, P. Albers-Heitner, Lycklama a Nijeholt, A. A. and T. Lagro-Janssen.** Pelvic floor muscle training is not effective in women with UI in pregnancy: a randomised controlled trial. 2007. 18:383-390 |
| **C. Wuertz, P. Gilbert, W. Baier and C. Kunz.** Cross-sectional study of factors that influence the 25-hydroxyvitamin D status in pregnant women and in cord blood in Germany. *Br.J.Nutr.* 2013. 110:1895-1902 |
| **C. Y. Yates, L. M. Boylan, R. D. Lewis and J. A. Driskell.** Maternal aerobic exercise and vitamin B-6 status. 1988. 48:117-121 |
| **C. Zhang, C. G. Solomon, J. E. Manson and F. B. Hu.** A prospective study of pregravid physical activity and sedentary behaviors in relation to the risk for gestational diabetes mellitus. *Arch.Intern.Med.* 2006. 166:543-548 |
| **Catherine Kim, Phyllis Brawarsky, Rebecca A. Jackson, Elena Fuentes-Afflick and Jennifer S. Haas.** Changes in health status experienced by women with gestational diabetes and pregnancy-induced hypertensive disorders. 2005. 14:729-736 |
| **Ch Estel and W. Turk.** The influence of a defined physical exercise during pregnancy on the functional values of the maternal cardiovascular system and on fetal heart rate. *Zentralbl.Gynakol.* 1987. 109:929-935 |
| **Cheryl Vamos, Sara Flory, Haichun Sun, et al.** Do Physical Activity Patterns Across the Lifecourse Impact Birth Outcomes?. *Maternal & Child Health Journal.* 2015. 19:1775-1782 8p |
| **Christopher P. Connolly.** Leisure-time physical activity perceptions, influences, and behavior during pregnancy. 2015. 75:No Pagination Specified |
| **Colleen Doyle, Elizabeth Werner, Tianshu Feng, et al.** Pregnancy distress gets under fetal skin: Maternal ambulatory assessment & sex differences in prenatal development. *Dev.Psychobiol.* 2015. 57:607-625 |
| **Corinne Urech, Nadine S. Fink, Irene Hoesli, Frank H. Wilhelm, Johannes Bitzer and Judith Alder.** Effects of relaxation on psychobiological wellbeing during pregnancy: A randomized controlled trial. 2010. 35:1348-1355 |
| **Cuilin Zhang, Deirdre K. Tobias, Jorge E. Chavarro, et al.** Adherence to healthy lifestyle and risk of gestational diabetes mellitus: Prospective cohort study. *BMJ: British Medical Journal Vol 349 Sep 2014, ArtID g5450.* 2014. 349: |
| **Curt L. Lox and Darren C. Treasure.** Changes in feeling states following aquatic exercise during pregnancy. 2000. 30:518-517 |
| **D. C. Hall and D. A. Kaufmann.** Effects of aerobic and strength conditioning on pregnancy outcomes. *American Journal of Obstetrics & Gynecology.* 1987. 157:1199-1203 |
| **D. C. Pinzon, K. Zamora, J. H. Martinez, et al.** Type of delivery and gestational age is not affected by pregnant Latin-American women engaging in vigorous exercise: a secondary analysis of data from a controlled randomized trial. *Revista de Salud Publica.* 2012. 14:731-743 |
| **D. Cannella, M. Lobel and A. Monheit.** Knowing is believing: information and attitudes towards physical activity during pregnancy. 2010. 31:236-242 |
| **D. Duncombe, H. Skouteris, E. H. Wertheim, L. Kelly, V. Fraser and S. J. Paxton.** Vigorous exercise and birth outcomes in a sample of recreational exercisers: a prospective study across pregnancy. *Aust.N.Z.J.Obstet.Gynaecol.* 2006. 46:288-292 |
| **D. E. Irwin, D. A. Savitz, K. A. St Andre and I. Hertz-Picciotto.** Study of occupational risk factors for pregnancy-induced hypertension among active duty enlisted Navy personnel. 1994. 25:349-359 |
| **D. H. Moore, J. C. Jarrett 2 and P. J. Bendick.** Exercise-induced changes in uterine artery blood flow, as measured by Doppler ultrasound, in pregnant subjects. *Am.J.Perinatol.* 1988. 5:94-97 |
| **D. Hruba, L. Kukla and M. Tyrlik.** Occupational risks for human reproduction: ELSPAC Study. European Longitudinal Study of Pregnancy and Childhood. *Cent.Eur.J.Public Health.* 1999. 7:210-215 |
| **D. J. Taylor, C. H. Thompson, G. J. Kemp, et al.** A relationship between impaired fetal growth and reduced muscle glycolysis revealed by 31P magnetic resonance spectroscopy. *Diabetologia.* 1995. 38:1205-1212 |
| **D. J. Tuffnell, P. C. Buchan, D. Albert and S. Tyndale-Biscoe.** Fetal heart rate responses to maternal exercise, increased maternal temperature and maternal circadian variation. *Journal of Obstetrics and Gynaecology.* 1990. 10:387-391 |
| **D. Jensen and D. E. O'Donnell.** The impact of human pregnancy on perceptual responses to chemoreflex vs. exercise stimulation of ventilation: a retrospective analysis. 2011. 175:55-61 |
| **D. Jensen, K. A. Webb and D. E. O'Donnell.** The increased ventilatory response to exercise in pregnancy reflects alterations in the respiratory control systems ventilatory recruitment threshold for CO2. 2010. 171:75-82 |
| **D. Jensen, K. A. Webb, G. A. Davies and D. E. O'Donnell.** Mechanical ventilatory constraints during incremental cycle exercise in human pregnancy: implications for respiratory sensation. 2008. 586:4735-4750 |
| **D. Jensen, K. A. Webb, G. A. Davies and D. E. O'Donnell.** Mechanisms of activity-related breathlessness in healthy human pregnancy. 2009. 106:253-265 |
| **D. Jensen, K. A. Webb, L. A. Wolfe and D. E. O'Donnell.** Effects of human pregnancy and advancing gestation on respiratory discomfort during exercise. *Respiratory Physiology and Neurobiology.* 2007. 156:85-93 |
| **D. Koniakgriffin.** Aerobic exercise, psychological well-being, and physical discomforts during adolescent pregnancy. *Res.Nurs.Health.* 1994. 17:253-263 |
| **D. L. Barnes, L. S. Adair and B. M. Popkin.** Women's physical activity and pregnancy outcome: a longitudinal analysis from the Philippines. 1991. 20:162-172 |
| **D. Mparmpakas, A. Goumenou, E. Zachariades, G. Pados, Y. Gidron and E. Karteris.** Immune system function, stress, exercise and nutrition profile can affect pregnancy outcome: Lessons from a Mediterranean cohort. 2013. 5:411-418 |
| **D. P. Misra, D. M. Strobino, E. E. Stashinko, D. A. Nagey and J. Nanda.** Effects of physical activity on preterm birth. *Am.J.Epidemiol.* 1998. 147:628-635 |
| **D. R. Di Fabio, C. K. Blomme, K. M. Smith, G. J. Welk and C. G. Campbell.** Adherence to physical activity guidelines in mid-pregnancy does not reduce sedentary time: an observational study. 2015. 12:27 |
| **D. R. Hollingsworth and T. R. Moore.** Postprandial walking exercise in pregnant insulin-dependent (type I) diabetic women: reduction of plasma lipid levels but absence of a significant effect on glycemic control. *American Journal of Obstetrics & Gynecology.* 1987. 157:1359-1363 |
| **D. S. Downs, G. C. LeMasurier and J. M. DiNallo.** Baby Steps: Pedometer-Determined and Self-Reported Leisure-Time Exercise Behaviors of Pregnant Women. *Journal of Physical Activity & Health.* 2009. 6:63-72 |
| **D. S. Downs, G. C. LeMasurier and J. M. DiNallo.** Baby steps: pedometer-determined and self-reported leisure-time exercise behaviors of pregnant women. 2009. 6:63-72 |
| **D. Simmons, J. G. Jelsma, S. Galjaard, et al.** Results From a European Multicenter Randomized Trial of Physical Activity and/or Healthy Eating to Reduce the Risk of Gestational Diabetes Mellitus: The DALI Lifestyle Pilot. 2015. 38:1650-1656 |
| **D. Symons Downs and J. S. Ulbrecht.** Understanding exercise beliefs and behaviors in women with gestational diabetes mellitus. 2006. 29:236-240 |
| **Danielle A. J. M. Schoenaker, Sabita S. Soedamah-Muthu, Leonie K. Callaway and Gita D. Mishra.** Prepregnancy dietary patterns and risk of developing hypertensive disorders of pregnancy: results from the Australian Longitudinal Study on Women's Health. 2015. 102:94-101 8 |
| **de Smoler Eisenberg, J. Armass-Dominguez, C. Dominguez-Munguia and S. Karchmer.** Maternal exercise and maternal and fetal heart rate]. *Arch.Invest.Med.* 1974. 5:595-602 |
| **de Viñaspre Hernández, Regina Ruiz, Encarnación Rubio Aranda and Concepción Tomás Aznar.** Urinary incontinence and weight changes during pregnancy and post partum: A pending challenge. 2013. 29:e123-9 1 |
| **Debbie M. Smith, Christine Ward, Shareen Forbes, Rebecca M. Reynolds and Fiona C. Denison.** Weight Management Guides for Pregnant Women with a Body Mass index (BMI) Greater than or Equal to 40kg/m[Superscript 2]: A Qualitative Exploration of Their Use in Maternity Care. 2013. 72:216-221 |
| **Deirdre Dlugonski and Robert W. Motl.** Marital status and motherhood: Implications for physical activity. *Women Health.* 2013. 53:203-215 |
| **Denise Maher.** Exercise and Weight Management for the Pregnant Amputee. 2006. 15:24-24 |
| **der Ploeg van, M. N. van Poppel, T. Chey, et al.** The role of pre-pregnancy physical activity and sedentary behaviour in the development of gestational diabetes mellitus. *Journal of Science & Medicine in Sport.* 2011. 14:149-152 4p |
| **Der Wijden Van, Van De Waal, W. Van Mechelen and Van Poppel M.N.M.** The relationship between moderate-to-vigorous intensity physical activity and insulin resistance, insulin-like growth factor (IGF-1)-system 1, leptin and weight change in healthy women during pregnancy and after delivery. *Clin.Endocrinol.(Oxf).* 2015. 82:68-75 |
| **Dominguez De Costa, Eisenberg De Smoler, J. Armas Dominguez and S. Karchmer.** Exercise tests, heart rate and changes in the mother's position. 1977. 42:11-19 |
| **E. A. Beyaz, E. Ozcan, A. Ketenci and M. M. Beyaz.** The effectiveness of pregnancy rehabilitation: Effects on low back pain and calf cramps during pregnancy and pregnancy outcome. 2011. 7:67-74 |
| **E. A. Morris, C. A. McBride, G. J. Badger and I. M. Bernstein.** Prepregnancy blood pressure and history of first trimester loss contribute to birth weight and placental weight. *Reproductive Sciences.* 2015. 22:185A-186A |
| **E. A. Steegers, G. Buunk, R. A. Binkhorst, H. W. Jongsma, P. F. Wijn and P. R. Hein.** The influence of maternal exercise on the uteroplacental vascular bed resistance and the fetal heart rate during normal pregnancy. *European Journal of Obstetrics, Gynecology, & Reproductive Biology.* 1988. 27:21-26 |
| **E. Althuizen, van der Wijden, C. L., W. van Mechelen, J. C. Seidell and M. N. van Poppel.** The effect of a counselling intervention on weight changes during and after pregnancy: a randomised trial. 2013. 120:92-99 |
| **E. Althuizen, van Poppel, M. N. M., J. C. Seidell and W. van Mechelen.** Correlates of absolute and excessive weight gain during pregnancy. 2009. 18:1559-1566 8 |
| **E. Dale, K. M. Mullinax and D. H. Bryan.** Exercise during pregnancy: effects on the fetus. *Canadian Journal of Applied Sport Sciences - Journal Canadien des Sciences Appliquees au Sport.* 1982. 7:98-103 |
| **E. E. Krans and J. C. Chang.** Low-income African American women's beliefs regarding exercise during pregnancy. 2012. 16:1180-1187 |
| **E. F. Magann, S. F. Evans and J. P. Newnham.** Employment, exertion, and pregnancy outcome: assessment by kilocalories expended each day. *American Journal of Obstetrics & Gynecology.* 1996. 175:182-187 |
| **E. F. Magann, S. F. Evans, B. Weitz and J. Newnham.** Antepartum, intrapartum, and neonatal significance of exercise on healthy low-risk pregnant working women. *Obstetrics & Gynecology.* 2002. 99:466-472 |
| **E. Forsum, N. Kabir, A. Sadurskis and K. Westerterp.** Total energy expenditure of healthy Swedish women during pregnancy and lactation. 1992. 56:334-342 |
| **E. Golomer, D. Ducher, G. S. Arfi and R. Sud.** A study of pregnant women while walking and while carrying a weight. French]. *J.Gynecol.Obstet.Biol.Reprod.* 1991. 20:406-412 |
| **E. Golomer, J. S. Arfi, R. Sud, B. Kapitaniak and J. Tomikowski.** Exercise and pregnancy. Study of the change in heart rate in pregnancy when performing standardized moderate exercise]. *J.Gynecol.Obstet.Biol.Reprod.* 1989. 18:295-302 |
| **E. Ha, S. I. Cho, H. Park, et al.** CME article #2: Does standing at work during pregnancy result in reduced infant birth weight?. *Journal of Occupational and Environmental Medicine.* 2002. 44:815-821 |
| **E. Haelterman, S. Marcoux, A. Croteau and M. Dramaix.** Population-based study on occupational risk factors for preeclampsia and gestational hypertension. *Scandinavian Journal of Work, Environment and Health.* 2007. 33:304-317 |
| **E. Heery, A. McConnon, C. C. Kelleher, P. G. Wall and F. M. McAuliffe.** PMC3827496; Perspectives on weight gain and lifestyle practices during pregnancy among women with a history of macrosomia: a qualitative study in the Republic of Ireland. *BMC Pregnancy & Childbirth.* 2013. 13:202 |
| **E. I. Florack, A. E. Pellegrino, G. A. Zielhuis and R. Rolland.** Influence of occupational physical activity on pregnancy duration and birthweight. *Scand.J.Work Environ.Health.* 1995. 21:199-207 |
| **E. I. Florack, G. A. Zielhuis, J. E. Pellegrino and R. Rolland.** Occupational physical activity and the occurrence of spontaneous abortion. 1993. 22:878-884 |
| **E. I. M. Florack, G. A. Zielhuis, J. E. M. C. Pellegrino and R. Rolland.** Occupational physical activity and the occurrence of spontaneous abortion. *Int.J.Epidemiol.* 1993. 22:878-884 |
| **E. J. Crenier and Y. Lambert.** [Influence of pre- and postnatal exercises on the abdominal wall]. 1975. 4:551-556 |
| **E. K. Rousham, P. E. Clarke and H. Gross.** Significant changes in physical activity among pregnant women in the UK as assessed by accelerometry and self-reported activity. *Eur.J.Clin.Nutr.* 2006. 60:393-400 |
| **E. Korpi-Hyovalti, S. Heinonen, U. Schwab, D. E. Laaksonen and L. Niskanen.** Effect of intensive counselling on physical activity in pregnant women at high risk for gestational diabetes mellitus. A clinical study in primary care. *Primary care diabetes.* 2012. 6:261-268 |
| **E. L. LeMoyne, D. Curnier and D. Ellemberg.** Pregnancy and cognition: deficits in inhibition are unrelated to changes in fitness. *Journal of clinical and experimental neuropsychology.* 2014. 36:178-185 |
| **E. L. LeMoyne, D. Curnier and D. Ellemberg.** Pregnancy and cognition: deficits in inhibition are unrelated to changes in fitness. 2014. 36:178-185 |
| **E. L. Rauff and D. S. Downs.** Mediating effects of body image satisfaction on exercise behavior, depressive symptoms, and gestational weight gain in pregnancy. 2011. 42:381-390 |
| **E. M. Alfadhli, E. N. Osman, T. H. Basri, et al.** Gestational diabetes among Saudi women: prevalence, risk factors and pregnancy outcomes. *Annals of Saudi Medicine.* 2015. 35:222-230 |
| **E. M. Ekholm, S. J. Piha, R. U. Erkkola and K. J. Antila.** Autonomic cardiovascular reflexes in pregnancy. A longitudinal study. *Clinical Autonomic Research.* 1994. 4:161-165 |
| **E. Mocevic, S. W. Svendsen, K. T. Joorgensen, P. Frost and J. P. Bonde.** Occupational lifting, fetal death and preterm birth: Findings from the Danish National Birth Cohort using a job exposure matrix. *PLoS ONE.* 2014. 9: |
| **E. Mocevic, S. W. Svendsen, K. T. Joorgensen, P. Frost and J. P. Bonde.** Occupational lifting, fetal death and preterm birth: Findings from the Danish National Birth Cohort using a job exposure matrix. 2014. 9: |
| **E. Nethery, M. Brauer and P. Janssen.** Time-activity patterns of pregnant women and changes during the course of pregnancy. 2009. 19:317-324 |
| **E. O. Im, W. Chee, H. J. Lim, Y. Liu and H. K. Kim.** Midlife women's attitudes toward physical activity. *JOGNN - Journal of Obstetric, Gynecologic, and Neonatal Nursing.* 2008. 37:203-213 |
| **E. Oken, Y. Ning, S. L. Rifas-Shiman, J. S. Radesky, J. W. Rich-Edwards and M. W. Gillman.** Associations of physical activity and inactivity before and during pregnancy with glucose tolerance. 2006. 108:1200-1207 |
| **E. P. Baciuk, R. I. Pereira, J. G. Cecatti, A. F. Braga and S. R. Cavalcante.** PMC2613131; Water aerobics in pregnancy: Cardiovascular response, labor and neonatal outcomes. *Reproductive Health.* 2008. 5:10 |
| **E. P. Durak, L. Jovanovic-Peterson and C. M. Peterson.** Comparative evaluation of uterine response to exercise on five aerobic machines. 1990. 162:754-756 |
| **E. Petrella, M. Malavolti, V. Bertarini, et al.** Gestational weight gain in overweight and obese women enrolled in a healthy lifestyle and eating habits program. *Journal of Maternal-Fetal & Neonatal Medicine.* 2014. 27:1348-1352 |
| **E. Petridou, H. Salvanos, A. Skalkidou, N. Dessypris, M. Moustaki and D. Trichopoulos.** Are there common triggers of preterm deliveries?. 2001. 108:598-604 |
| **E. Rutkowska and C. Lepecka-Klusek.** The role of physical activity in preparing women for pregnancy and delivery in Poland. 2002. 23:919-923 |
| **E. S. Ji and H. R. Han.** The effects of Qi exercise on maternal/fetal interaction and maternal well-being during pregnancy. *JOGNN - Journal of Obstetric, Gynecologic, & Neonatal Nursing.* 2010. 39:310-318 |
| **E. S. Ji and H. R. Han.** The effects of Qi exercise on maternal/fetal interaction and maternal well-being during pregnancy. 2010. 39:310-318 |
| **E. S. Lindholm, M. Norman, C. P. Kilander and D. Altman.** Weight control program for obese pregnant women. *Acta Obstet.Gynecol.Scand.* 2010. 89:840-843 |
| **E. T. Reilly, R. M. Freeman, M. R. Waterfield, A. E. Waterfield, P. Steggles and F. Pedlar.** Prevention of postpartum stress incontinence in primigravidae with increased bladder neck mobility: a randomised controlled trial of antenatal pelvic floor exercises. 2014. 121 Suppl 7:58-66 |
| **E. Thorell and P. Kristiansson.** Pregnancy related back pain, is it related to aerobic fitness? A longitudinal cohort study. 2012. 12:30 |
| **E. Thorell, K. Svardsudd, K. Andersson and P. Kristiansson.** Moderate impact of full-term pregnancy on estimated peak oxygen uptake, physical activity and perceived health. *Acta Obstet.Gynecol.Scand.* 2014. 89:1140-1148 |
| **E. Thorell, L. Goldsmith, G. Weiss and P. Kristiansson.** Physical fitness, serum relaxin and duration of gestation. 2015. 15:168 |
| **E. Tlapáková, K. Jelen and M. Minař**. The relationship between pelvis inclination, exercise and low back pain (LBP) during pregnancy. 2011. 41:15-21 |
| **E. V. Bennett, C. E. McEwen, L. H. Clarke, K. A. Tamminen and P. R. E. Crocker.** 'It's all about modifying your expectations': Women's experiences with physical activity during pregnancy. 2013. 5:267-286 |
| **E. V. Espel, L. M. Glynn, C. A. Sandman and E. P. Davis.** PMC4244187; Longer gestation among children born full term influences cognitive and motor development. *PLoS ONE Electronic Resource].* 2014. 9:e113758 |
| **E. V. Tyldum, P. R. Romundstad and S. A. Slordahl.** Pre-pregnancy physical activity and preeclampsia risk: a prospective population-based cohort study. *Acta Obstet.Gynecol.Scand.* 2010. 89:315-320 |
| **E. W. Reid, J. A. McNeill, F. A. Alderdice, M. A. Tully and V. A. Holmes.** Physical activity, sedentary behaviour and fetal macrosomia in uncomplicated pregnancies: a prospective cohort study. *Midwifery.* 2014. 30:1202-1209 |
| **E. Weallens, A. Clark, P. MacIntyre and M. Gaudoin.** A survey of exercise patterns in primigravidae at a Scottish NHS trust: More consistent support and advice required for women and their families. *Health Educ.J.* 2003. 62:234-245 |
| **E. Wergeland, K. Strand and P. E. Bordahl.** Strenuous working conditions and birthweight, Norway 1989. *Acta Obstet.Gynecol.Scand.* 1998. 77:263-271 |
| **E. White, J. Pivarnik and K. Pfeiffer.** Resistance training during pregnancy and perinatal outcomes. *Journal of Physical Activity & Health.* 2014. 11:1141-1148 |
| **E. Y. Wong, R. Ray, D. L. Gao, et al.** Physical activity, physical exertion, and miscarriage risk in Women textile Workers in Shanghai, china. *Am.J.Ind.Med.* 2010. 53:497-505 |
| **E. Zaharieva.** Olympic participation by women. Effects on pregnancy and childbirth. *JAMA.* 1972. 221:992-995 |
| **El Metwalli, A. G. A., A. M. Badawy, L. A. El Baghdadi and A. El Wehady.** Occupational physical activity and pregnancy outcome. *European Journal of Obstetrics Gynecology and Reproductive Biology.* 2001. 100:41-45 |
| **Elaine S. Marshall, Bridget Melton, Helen Bland and Jacquelyn Nagle.** Physical Activity and Muscular Strengthening in Pregnancy: A Rural Urban Comparison. 2013. 13:50-65 16 |
| **Eman Mohammed Alfadhli, Eman Naguib Osman, Taghreed Hamza Basri, et al.** Gestational diabetes among Saudi women: prevalence, risk factors and pregnancy outcomes. *Annals of Saudi Medicine.* 2015. 35:222-230 |
| **Erica P. Gunderson, Charles P. Quesenberry Jr., Cora E. Lewis, et al.** Development of Overweight Associated with Childbearing Depends on Smoking Habit: The Coronary Artery Risk Development in Young Adults (CARDIA) Study. 2004. 12:2041-2053 |
| **F. Aliaga-Martinez, E. Prats-Ribera, M. Alsina-Hlipolito and A. Allepuz-Palau.** Impact on the function of the pelvic floor muscles of a specific training program included in the routine monitoring of pregnancy and postpartum non-randomized controlled trial. Spanish]. *Matronas Profesion.* 2013. 14:36-44 |
| **F. Doran and A. P. O'Brien.** A brief report of attitudes towards physical activity during pregnancy. *Health Promotion Journal of Australia.* 2007. 18:155-158 |
| **F. Doran and K. Davis.** Factors that influence physical activity for pregnant and postpartum women and implications for primary care. *Australian Journal of Primary Health.* 2011. 17:79-85 |
| **F. Doran.** Gestational diabetes mellitus: Perspectives on lifestyle changes during pregnancy and post-partum, physical activity and the prevention of future type 2 diabetes. 2008. 14:85-92 |
| **F. Ebrahimi, Z. M. Shariff, S. Z. Tabatabaei, M. S. Fathollahi, C. Y. Mun and M. Nazari.** Relationship between sociodemographics, dietary intake, and physical activity with gestational weight gain among pregnant women in Rafsanjan City, Iran. 2015. 33:168-176 |
| **F. K. Lotgering, A. van den Berg, P. C. Struijk and H. C. Wallenburg.** Arterial pressure response to maximal isometric exercise in pregnant women. 1992. 166:538-542 |
| **F. K. Lotgering, M. B. van Doorn, P. C. Struijk, J. Pool and H. C. Wallenburg.** Maximal aerobic exercise in pregnant women: heart rate, O2 consumption, CO2 production, and ventilation. 1991. 70:1016-1023 |
| **F. K. Lotgering, P. C. Struijk, M. B. van Doorn, W. E. Spinnewijn and H. C. Wallenburg.** Anaerobic threshold and respiratory compensation in pregnant women. 1995. 78:1772-1777 |
| **F. K. Lotgering, W. E. Spinnewijn, P. C. Struijk, F. Boomsma and H. C. Wallenburg.** Respiratory and metabolic responses to endurance cycle exercise in pregnant and postpartum women. 1998. 19:193-198 |
| **F. M. Doran and N. A. Buckley.** Walking patterns in pregnancy. *Australian Journal of Primary Health.* 2013. 19:213-218 |
| **F. M. Kovacs, E. Garcia, A. Royuela, L. Gonzalez, V. Abraira and Spanish Back Pain Research, Network.** Prevalence and factors associated with low back pain and pelvic girdle pain during pregnancy: a multicenter study conducted in the Spanish National Health Service. 2012. 37:1516-1533 |
| **F. Momeni Javid, M. Simbar, M. Dolatian and H. Alavi Majd.** Comparison of lifestyles of women with gestational diabetes and healthy pregnant women. *Global Journal of Health Science.* 2015. 7:162-169 |
| **F. Nasiri-Amiri, A. Bakhtiari, M. Faramarzi, H. Adib Rad and H. Pasha.** The Association Between Physical Activity During Pregnancy and Gestational Diabetes Mellitus: A Case-Control Study. *International Journal of Endocrinology and Metabolism.* 2016. 14:e37123 |
| **F. O. Omokhodion, M. O. Onadeko, O. A. Roberts, J. R. Beach, I. Burstyn and N. M. Cherry.** Paid work, domestic work, and other determinants of pregnancy outcome in Ibadan, southwest Nigeria. *International Journal of Gynaecology & Obstetrics.* 2010. 111:165-170 |
| **F. P. McCarthy, A. S. Khashan, D. Murray, et al.** Parental physical and lifestyle factors and their association with newborn body composition. *BJOG: An International Journal of Obstetrics and Gynaecology.* 2016. 123:1824-1829 |
| **F. Sehati Shafayi, M. Akef, H. Sadegi and A. Sallakh Niknazhad.** PMC3825354; A Comparison of Physical Activity and Nutritional Practices in Hypertensive and Non- hypertensive Pregnant Women. *Journal of Cardiovascular & Thoracic Research.* 2012. 4:53-56 |
| **F. Shobeiri and K. Begum.** Physical activity and pregnancy outcome among Indian women belonging to high socioeconomic families. *Journal of Postgraduate Medical Institute.* 2005. 19:125-129 |
| **Fahimeh Sehati Shafayi, Maryam Akef, Homayoon Sadegi and Akram sallakh Niknazhad.** A Comparison of Physical Activity and Nutritional Practices in Hypertensive and Non- hypertensive Pregnant Women. 2012. 4:53-56 4 |
| **Fernandes da Mota, P. G., A. G. Pascoal, A. I. Carita and K. Bo.** Prevalence and risk factors of diastasis recti abdominis from late pregnancy to 6 months postpartum, and relationship with lumbo-pelvic pain. 2015. 20:200-205 |
| **G. A. Dumas, J. G. Reid, L. A. Wolfe, M. P. Griffin and M. J. McGrath.** Exercise, posture, and back pain during pregnancy. Part 1. Exercise and posture. 1995. 10:98-103 |
| **G. A. Dumas, J. G. Reid, L. A. Wolfe, M. P. Griffin and M. J. McGrath.** Exercise, posture, and back pain during pregnancy. Part 2. Exercise and back pain. 1995. 10:104-109 |
| **G. A. Hackett, T. Cohen-Overbeek and S. Campbell.** The effect of exercise on uteroplacental Doppler waveforms in normal and complicated pregnancies. *Obstetrics & Gynecology.* 1992. 79:919-923 |
| **G. Ahlborg Jr.** Physical work load and pregnancy outcome. 1995. 37:941-944 |
| **G. C. Di Renzo, I. Giardina, A. Rosati, et al.** Maternal risk factors for preterm birth: a country-based population analysis. *European Journal of Obstetrics, Gynecology, & Reproductive Biology.* 2011. 159:342-346 |
| **G. Candido, T. Lo and P. A. Janssen.** Risk factors for diastasis of the recti abdominis. 2005. 49-54 6 |
| **G. Cito, S. Luisi, A. Mezzesimi, C. Cavicchioli, G. Calonaci and F. Petraglia.** Maternal position during non-stress test and fetal heart rate patterns. 2005. 84:335-338 |
| **G. Cuco, V. Arija, R. Iranzo, J. Vila, M. T. Prieto and J. Fernandez-Ballart.** Association of maternal protein intake before conception and throughout pregnancy with birth weight. 2006. 85:413-421 |
| **G. Eriksen, M. Wohlert, V. Ersbak, L. Hvidman, M. Hedegaard and K. Skajaa.** Placental abruption. A case-control investigation. 1991. 98:448-452 |
| **G. Jans, L. Ameye, C. Matthys, et al.** Does lifestyle coaching affect diet and physical activity stage of change scores in obese pregnant women? Pilot observations from the European DALI project. *Obesity Facts.* 2014. 7:132 |
| **G. Laura, L. Gianfranco and G. Donatella.** Pelvic floor muscle training during pregnancy to prevent urinary pelvic floor dysfunctions. *Neurourol.Urodyn.* 2010. 29:64-65 |
| **G. Lee, S. Challenger, M. McNabb and M. Sheridan.** A randomised controlled trial on exercise in pregnancy. 1996. |
| **G. M. Dado, P. B. Dobrin and R. S. Mrkvicka.** Venous flow through coiled and noncoiled umbilical cords. Effects of external compression, twisting and longitudinal stretching. *J.Reprod.Med.* 1997. 42:576-580 |
| **G. M. Egeland, K. Klungsoyr, N. Oyen, G. S. Tell, O. Naess and R. Skjaerven.** Preconception cardiovascular risk factor differences between gestational hypertension and preeclampsia: Cohort Norway study. *Hypertension.* 2016. 67:1173-1180 |
| **G. N. Bedell and R. W. Adams.** Pulmonary Diffusing Capacity during Rest and Exercise. A Study of Normal Persons and Persons with Atrial Septal Defect, Pregnancy, and Pulmonary Disease. 1962. 41:1908-1914 |
| **G. N. Brankston, B. F. Mitchell, E. A. Ryan and N. B. Okun.** Resistance exercise decreases the need for insulin in overweight women with gestational diabetes mellitus. *American Journal of Obstetrics & Gynecology.* 2004. 190:188-193 |
| **G. Nagel, M. Wabitsch, C. Galm, et al.** Determinants of obesity in the Ulm Research on Metabolism, Exercise and Lifestyle in Children (URMEL-ICE). 2009. 168:1259-1267 |
| **G. Ramirez, R. M. Grimes, J. F. Annegers, B. R. Davis and C. H. Slater.** Occupational physical-activity and other risk-factors for preterm birth among united-states-army primigravidas. *Am.J.Public Health.* 1990. 80:728-729 |
| **G. Risvas, I. Papaioannou, D. B. Panagiotakos, P. Farajian, V. Bountziouka and A. Zampelas.** Perinatal and family factors associated with preadolescence overweight/obesity in Greece: the GRECO study. 2012. 2:145-153 |
| **G. S. Berkowitz, J. L. Kelsey, T. R. Holford and R. L. Berkowitz.** Physical activity and the risk of spontaneous preterm delivery. *J.Reprod.Med.* 1983. 28:581-588 |
| **G. S. Berkowitz.** An epidemiologic study of preterm delivery. 1981. 113:81-92 |
| **G. Torres-Luque, L. Torres-Luque, S. Garc**. Seguimiento de un programa de actividad f. 2012. 11:84-92 |
| **G. Varrassi, C. Bazzano and W. T. Edwards.** Effects of physical activity on maternal plasma beta-endorphin levels and perception of labor pain. 1989. 160:707-712 |
| **G. Xu, Y. Wu, L. Yang, et al.** Risk factors for early miscarriage among Chinese: a hospital-based case-control study. *Fertility & Sterility.* 2014. 101:1663-1670 |
| **G. Zhao, E. S. Ford, J. Tsai, et al.** Trends in health-related behavioral risk factors among pregnant women in the United States: 2001-2009. 2012. 21:255-263 |
| **Gema Torres-Luque, Luc**. Empleo del poms durante un programa de actividad física en el medio acuático para mujeres embarazadas. / use of the poms during a physical activity program in aquatic environment for pregnant women. 2010. 10:37-45 |
| **Glasgow University of, Scottish Collaboration for Public Health, Research and Policy.** Mellow Bumps RCT - Antenatal Intervention for Vulnerable Women. 2013. |
| **Guglielmina Fantuzzi, Elena Righi and Gabriella Aggazzotti.** A Case-Control Study on Leisure Time Physical Activity (LTPA) during the Last Three Months of Pregnancy and Foetal Outcomes in Italy. *Health (1949-4998).* 2016. 8:133-143 11p |
| **H. A. Hausenblas, B. W. Brewer, J. L. Van Raalte, et al.** Development and evaluation of a multimedia CD-ROM for exercise during pregnancy and postpartum. 2008. 70:215-219 |
| **H. Baumann, A. Huch and R. Huch.** Doppler sonographic evaluation of exercise-induced blood flow velocity and waveform changes in fetal, uteroplacental and large maternal vessels in pregnant women. *J.Perinat.Med.* 1989. 17:279-287 |
| **H. C. Ostgaard, G. Zetherstrom, E. Roos-Hansson and B. Svanberg.** Reduction of back and posterior pelvic pain in pregnancy. 1994. 19:894-900 |
| **H. Cramer, J. Frawley, A. Steel, et al.** Characteristics of women who practice yoga in different locations during pregnancy. 2015. 5:e008641 |
| **H. D. Junge.** Behavioral states and state related heart rate and motor activity patterns in the newborn infant and the fetus antepartum -- a comparative study. I. Technique, illustration of recordings, and general results. 1979. 7:85-107 |
| **H. D. Junge.** Behavioral states and state-related heart rate and motor activity patterns in the newborn infant and the fetus ante partum. A comparative study. III. Analysis of sleep state-related motor activity patterns. 1980. 10:239-246 |
| **H. Dahlstrom and K. Ihrman.** A clinical and physiological study of pregnancy in a material from northern Sweden. V. The results of work tests during and after pregnancy. 1960. 65:305-314 |
| **H. E. Harris, G. T. Ellison and S. Clement.** Do the psychosocial and behavioral changes that accompany motherhood influence the impact of pregnancy on long-term weight gain?. 1999. 20:65-79 |
| **H. Elden, H. Hagberg, M. F. Olsen, L. Ladfors and H. C. Ostgaard.** Regression of pelvic girdle pain after delivery: follow-up of a randomised single blind controlled trial with different treatment modalities. 2008. 87:201-208 |
| **H. Elden, H. Ostgaard, M. Fagevik-Olsen, L. Ladfors and H. Hagberg.** Treatment of pelvic girdle pain in pregnant women: adverse effects of standard treatment, acupuncture and stabilising exercises on the pregnancy, mother, delivery and the fetus/neonate. *BMC Complementary & Alternative Medicine.* 2008. 8:13p-13p 1p |
| **H. Elden, L. Ladfors, M. F. Olsen, H. C. Ostgaard and H. Hagberg.** Effects of acupuncture and stabilising exercises as adjunct to standard treatment in pregnant women with pelvic girdle pain: randomised single blind controlled trial. 2005. 330:761 |
| **H. G. Knuttgen and K. Emerson Jr.** Physiological response to pregnancy at rest and during exercise. *J.Appl.Physiol.* 1974. 36:549-553 |
| **H. H. Kim, A. Nava-Ocampo, S. K. Kim, et al.** Is prenatal childbirth preparation effective in decreasing adverse maternal and neonatal response to labor? A nested case-control study. *Acta Bio-Medica de l Ateneo Parmense.* 2008. 79:18-22 |
| **H. Hausenblas, D. S. Downs, P. Giacobbi, D. Tuccitto and B. Cook.** A multilevel examination of exercise intention and behavior during pregnancy. 2008. 66:2555-2561 |
| **H. Hausenblas, P. Giacobbi, B. Cook, R. Rhodes and A. Cruz.** Prospective examination of pregnant and nonpregnant women's physical activity beliefs and behaviours. *Journal of Reproductive and Infant Psychology.* 2011. 29:308-319 |
| **H. Jiang, X. Qian, M. Li, et al.** Can physical activity reduce excessive gestational weight gain? Findings from a Chinese urban pregnant women cohort study. *International Journal of Behavioral Nutrition and Physical Activity.* 2012. 9: |
| **H. K. Hegaard, B. Ottesen, M. Hedegaard, et al.** The association between leisure time physical activity in the year before pregnancy and pre-eclampsia. *Journal of Obstetrics & Gynaecology.* 2010. 30:21-24 |
| **H. K. Hegaard, K. Petersson, M. Hedegaard, et al.** Sports and leisure-time physical activity in pregnancy and birth weight: a population-based study. *Scand.J.Med.Sci.Sports.* 2010. 20:e96-102 |
| **H. K. Hegaard, M. Hedegaard, P. Damm, B. Ottesen, K. Petersson and T. B. Henriksen.** Leisure time physical activity is associated with a reduced risk of preterm delivery. *American Journal of Obstetrics & Gynecology.* 2008. 198:180.e1-180.e5 |
| **H. K. Hegaard, P. Damm, M. Hedegaard, et al.** Sports and leisure time physical activity during pregnancy in nulliparous women. *Maternal & Child Health Journal.* 2011. 15:806-813 |
| **H. Kahyaoglu Sut and P. Balkanli Kaplan.** Effect of pelvic floor muscle exercise on pelvic floor muscle activity and voiding functions during pregnancy and the postpartum period. 2015. |
| **H. Kirkegaard, H. Stovring, K. M. Rasmussen, B. Abrams, T. I. Sorensen and E. A. Nohr.** Maternal weight change from prepregnancy to 7 years postpartum--the influence of behavioral factors. 2015. 23:870-878 |
| **H. Klomp, R. F. Dyck and S. Sheppard.** Description and evaluation of a prenatal exercise program for urban aboriginal women. *Canadian Journal of Diabetes.* 2003. 27:231-238 |
| **H. Kobe, A. Nakai, T. Koshino and T. Araki.** Effect of regular maternal exercise on lipid peroxidation levels and antioxidant enzymatic activities before and after delivery. 2002. 69:542-548 |
| **H. M. Whitford, B. Alder and M. Jones.** A cross-sectional study of knowledge and practice of pelvic floor exercises during pregnancy and associated symptoms of stress urinary incontinence in North-East Scotland. 2007. 23:204-217 |
| **H. Medek, T. Halldorsson, I. Gunnarsdottir and R. T. Geirsson.** Physical activity of relatively high intensity in mid-pregnancy predicts lower glucose tolerance levels. *Acta Obstet.Gynecol.Scand.* 2016. 26:26 |
| **H. Mendieta Zeron, A. Garduno Alanis, P. Montserrat Nava Diaz, J. Guadalupe Santillan Benitez, De La Rosa and G. Conzuelo Rodriguez.** Low activity in pregnancy does not modify neither adiponectin nor leptin serum levels. 2013. 172:773-779 |
| **H. N. Soultanakis, R. Artal and R. A. Wiswell.** Prolonged exercise in pregnancy: glucose homeostasis, ventilatory and cardiovascular responses. *Semin.Perinatol.* 1996. 20:315-327 |
| **H. N. Soultanakis, R. Artal and R. A. Wiswell.** Prolonged exercise in pregnancy: glucose homeostasis, ventilatory and cardiovascular responses. 1996. 20:315-327 |
| **H. N. Winn, O. Hess, I. Goldstein, F. Wackers and J. C. Hobbins.** Fetal responses to maternal exercise: effect on fetal breathing and body movement. *Am.J.Perinatol.* 1994. 11:263-266 |
| **H. Prapavessis, S. De Jesus, T. Harper, et al.** The effects of acute exercise on tobacco cravings and withdrawal symptoms in temporary abstinent pregnant smokers. 2014. 39:703-708 |
| **H. R. Murphy, K. Kumareswaran, J. M. Allen, et al.** Closed loop insulin delivery protects against nocturnal hypoglycaemia after moderate physical activity in pregnant women with Type 1 diabetes. *Diabetic Med.* 2011. 28:18 |
| **H. Taskinen, P. Kyyronen and K. Hemminki.** Effects of ultrasound, shortwaves, and physical exertion on pregnancy outcome in physiotherapists. 1990. 44:196-201 |
| **H. Taskinen, P. Kyyronen and K. Hemminki.** PMC1060641; Effects of ultrasound, shortwaves, and physical exertion on pregnancy outcome in physiotherapists. *Journal of Epidemiology & Community Health.* 1990. 44:196-201 |
| **H. Volejnikova, K. Janku, M. Cernoch and J. Buzkova.** The influence of exercise on the course of confinement in pregnant woman with cardiopathies. *Rehabilitacia.* 1984. 17:37-40 |
| **H. Y. Yong, Z. Mohd Shariff, S. J. Koo and N. S. Binti Sa'ari.** Pre-pregnancy body mass index, height and physical activity are associated with rate of gestational weight gain among Malaysian mothers. *Journal of Obstetrics & Gynaecology Research.* 2016. 26:26 |
| **Hanan E-Mekawy, Adly Ali Sabbour and Mohamed Mostafa Radwan.** Effect of Antenatal Exercises on Umbilical Blood Flow and Neonate Wellbeing in Diabetic Pregnant Women. *Indian Journal of Physiotherapy & Occupational Therapy.* 2012. 6:121-125 5p |
| **Hao-Yuan Chang, Yeur-Hur Lai, Mark P. Jensen, et al.** Factors associated with low back pain changes during the third trimester of pregnancy. 2014. 70:1054-1064 11 |
| **Heather A. Hausenblas and Danielle Symons Downs.** Prospective Examination of Leisure-Time Exercise Behavior During Pregnancy. 2005. 17:240-246 |
| **Heather Jeffcoat.** Perinatal Wellness. Top 5 Pregnancy Exercises for Low Back Pain. 2011. 26:9-10 2 |
| **Helena Andrade Figueira, de Souza Vale, Rodrigo Gomes, Wilma Ferreira Guedes Rodrigues, Alan Andrade Figueira, Joana Andrade Figueira and Estélio Henrique Martin Dantas.** Pregnancy-Related Low Back Pain Relief after Maximum Static Flexibility Program. 2014. 6:2966-2972 7 |
| **Hora Soltani, Alexandra M. S. Duxbury, Madelynne A. Arden, Andy Dearden, Penny J. Furness and Carolyn Garland.** Maternal Obesity Management Using Mobile Technology: A Feasibility Study to Evaluate a Text Messaging Based Complex Intervention during Pregnancy. 2015. 2015:1-10 10 |
| **I. A. Santos, R. Stein, S. C. Fuchs, et al.** Aerobic exercise and submaximal functional capacity in overweight pregnant women: a randomized trial. *Obstetrics & Gynecology.* 2005. 106:243-249 |
| **I. Danielsen, C. Granstrom, D. Rytter, et al.** Does physical activity during pregnancy adversely influence markers of the metabolic syndrome in adult offspring? A prospective study over two decades. *Journal of Epidemiology & Community Health.* 2013. 67:648-654 |
| **I. Esteban-Cornejo, D. Martinez-Gomez, C. Tejero-Gonzalez, et al.** Maternal physical activity before and during the prenatal period and the offspring's academic performance in youth. The UP&DOWN study. *Journal of Maternal-Fetal & Neonatal Medicine.* 2016. 29:1414-1420 |
| **I. Finkelstein, A. C. Kanitz, R. Bgeginski, et al.** Comparison of the rating of perceived exertion and oxygen uptake during exercise between pregnant and non-pregnant women and between water and land-based exercises. *Revista Brasileira de Medicina do Esporte.* 2012. 18:13-16 |
| **I. Finkelstein, P. A. de Figueiredo, C. L. Alberton, R. Bgeginski, R. Stein and L. F. Kruel.** Cardiorespiratory responses during and after water exercise in pregnant and non-pregnant women. *Revista Brasileira de Ginecologia e Obstetricia.* 2011. 33:388-394 |
| **I. Giroux, S. D. Inglis, S. Lander, S. Gerrie and M. F. Mottola.** Dietary intake, weight gain, and birth outcomes of physically active pregnant women: a pilot study. *Applied Physiology, Nutrition, & Metabolism = Physiologie Appliquee, Nutrition et Metabolisme.* 2006. 31:483-489 |
| **I. Guelinckx, R. Devlieger, P. Mullie and G. Vansant.** Effect of lifestyle intervention on dietary habits, physical activity, and gestational weight gain in obese pregnant women: a randomized controlled trial. *Am.J.Clin.Nutr.* 2010. 91:373-380 |
| **I. K. Brenner, L. A. Wolfe, M. Monga and M. J. McGrath.** Physical conditioning effects on fetal heart rate responses to graded maternal exercise. *Medicine & Science in Sports & Exercise.* 1999. 31:792-799 |
| **I. Kantola, T. Kaila and R. Erkkola.** Acute exercise- and drug-induced potassium shifts during pregnancy. 1994. 208:88-90 |
| **I. Kawabata, A. Nakai, A. Sekiguchi, Y. Inoue and T. Takeshita.** The effect of regular exercise training during pregnancy on postpartum brachial-ankle pulse wave velocity, a measure of arterial stiffness. 2012. 11:489-494 |
| **I. M. Claesson, A. Josefsson, M. Cedergren, et al.** Consumer satisfaction with a weight-gain intervention programme for obese pregnant women. 2008. 24:163-167 |
| **I. Marc, J. Plaisance, C. Rheaume, et al.** Correlates of maternal cardiorespiratory fitness in the early second trimester of pregnancy. *Canadian Journal of Diabetes.* 2011. 35 (2):181-182 |
| **I. N. McIntyre and N. A. Broadhurst.** Effective treatment of low back pain in pregnancy. 1996. 25:S65-7 1 |
| **I. Nygaard, T. Girts, N. H. Fultz, K. Kinchen, G. Pohl and B. Sternfeld.** Is urinary incontinence a barrier to exercise in women?. *Obstet.Gynecol.* 2005. 106:307-314 |
| **I. Raisanen, K. Salminen and T. Laatikainen.** Response of plasma immunoreactive beta-endorphin and corticotropin to isometric exercise in uncomplicated pregnancy and in pregnancy-induced hypertension. 1990. 35:119-124 |
| **I. Rauramo and M. Forss.** Effect of exercise on maternal hemodynamics and placental blood flow in healthy women. *Acta Obstet.Gynecol.Scand.* 1988. 67:21-25 |
| **I. Rauramo, B. Andersson, T. Laatikainen and J. Pettersson.** Stress hormones and placental steroids in physical exercise during pregnancy. *British Journal of Obstetrics & Gynaecology.* 1982. 89:921-925 |
| **I. Rauramo, K. Salminen and T. Laatikainen.** Release of beta-endorphin in response to physical exercise in non-pregnant and pregnant women. 1986. 65:609-612 |
| **I. Rauramo, S. Ilmonen, L. Viinikka and O. Ylikorkala.** Prostacyclin and thromboxane in pregnant and nonpregnant women in response to exercise. 1995. 85:1027-1030 |
| **I. Rauramo.** Effect of short-term physical exercise on foetal heart rate and uterine activity in normal and abnormal pregnancies. *Ann.Chir.Gynaecol.* 1987. 76:274-279 |
| **I. Szeto, D. Ma, F. Liu, et al.** The prevalence of excess weight gain, imbalanced dietary intake, and physical inactivity among pregnant women in urban areas of China. *Obesity Reviews.* 2014. 15:179 |
| **I. W. Aitken.** Determinants of low birthweight among the Mendi of Sierra Leone: implications for medical and socio-economic strategies. 1990. 33:103-109 |
| **Iii J. F. Clapp and W. Kiess.** Effects of pregnancy and exercise on concentrations of the metabolic markers tumor necrosis factor alpha and leptin. *Obstet.Gynecol.* 2000. 182:300-306 |
| **Iii J. F. Clapp, B. Lopez and R. Harcar-Sevcik.** Neonatal behavioral profile of the offspring of women who continued to exercise regularly throughout pregnancy. *Obstet.Gynecol.* 1999. 180:91-94 |
| **Iii J. F. Clapp, S. Schmidt, A. Paranjape and B. Lopez.** Maternal insulin-like growth factor-I levels (IGF-I) reflect placental mass and neonatal fat mass. *Obstet.Gynecol.* 2004. 190:730-736 |
| **Iii J. F. Clapp.** Diet, exercise, and fete-placental growth. 1997. 260:101-108 |
| **Iii J. F. Clapp.** Effect of dietary carbohydrate on the glucose and insulin response to mixed caloric intake and exercise in both nonpregnant and pregnant women. *Diabetes Care.* 1998. 21:B107-B112 |
| **J. A. Carvajal, A. M. Delpiano, M. A. Cuello and J. A. Poblete.** Mechanical stretch increases brain natriuretic peptide production and secretion in the human fetal membranes. *Reproductive Sciences.* 2013. 20:597-604 |
| **J. A. Daniel, C. E. Dikki and W. Ibrahim.** Aerobic dance exercise improves blood glucose level in pregnant women with gestational diabetes mellitus. *African Journal for Physical, Health Education, Recreation & Dance.* 2014. 20:273-281 |
| **J. A. Grisso, D. M. Main, G. Chiu, E. S. Synder and J. H. Holmes.** Effects of physical activity and life-style factors on uterine contraction frequency. *Am.J.Perinatol.* 1992. 9:489-492 |
| **J. A. Leiferman and K. R. Evenson.** The effect of regular leisure physical activity on birth outcomes. *Maternal & Child Health Journal.* 2003. 7:59-64 |
| **J. Bustamante, R. Ramirez-Velez, A. C. D. Aguilar, A. Czerniczyniec and S. Lores-Arnaiz.** Aerobic Exercise Training During Pregnancy Improves Mitochondrial Function In Human Placenta. *Med.Sci.Sports Exerc.* 2012. 44:746-746 |
| **J. C. Dempsey, C. L. Butler, T. K. Sorensen, et al.** A case-control study of maternal recreational physical activity and risk of gestational diabetes mellitus. *Diabetes Research & Clinical Practice.* 2004. 66:203-215 |
| **J. C. Dempsey, T. K. Sorensen, I. M. Lee, et al.** Recreational physical activity during and before pregnancy and risk of gestational diabetes mellitus. *Am.J.Epidemiol.* 2003. 157:S75-S75 |
| **J. C. Dempsey, T. K. Sorensen, M. A. Williams, et al.** Prospective study of gestational diabetes mellitus risk in relation to maternal recreational physical activity before and during pregnancy. *Am.J.Epidemiol.* 2004. 159:663-670 |
| **J. C. Eisenman, M. A. Sarzynski, J. Tucker and K. A. Heelan.** Maternal Prepregnancy Overweight and Offspring Fatness and Blood Pressure: Role of Physical Activity. *Pediatric Exercise Science.* 2010. 22:369-378 |
| **J. C. Hauth, L. C. Gilstrap 3 and K. Widmer.** Fetal heart rate reactivity before and after maternal jogging during the third trimester. *American Journal of Obstetrics & Gynecology.* 1982. 142:545-547 |
| **J. C. Jarrett 2 and W. N. Spellacy.** Jogging during pregnancy: an improved outcome?. *Obstetrics & Gynecology.* 1983. 61:705-709 |
| **J. C. Veille, A. E. Bacevice, B. Wilson, J. Janos and H. K. Hellerstein.** Umbilical artery waveform during bicycle exercise in normal pregnancy. *Obstetrics & Gynecology.* 1989. 73:957-960 |
| **J. C. Veille, A. R. Hohimer, K. Burry and L. Speroff.** The effect of exercise on uterine activity in the last eight weeks of pregnancy. *American Journal of Obstetrics & Gynecology.* 1985. 151:727-730 |
| **J. C. Veille, D. W. Kitzman and A. E. Bacevice.** Effects of pregnancy on the electrocardiogram in healthy subjects during strenuous exercise. *Obstet.Gynecol.* 1996. 175:1360-1364 |
| **J. C. Veille, D. W. Kitzman, P. D. Millsaps and P. D. Kilgo.** Left ventricular diastolic filling response to stationary bicycle exercise during pregnancy and the postpartum period. 2001. 185:822-827 |
| **J. C. Veille, H. K. Hellerstein and A. E. Bacevice Jr.** Maternal left ventricular performance during bicycle exercise. 1992. 69:1506-1508 |
| **J. C. Veille, H. K. Hellerstein, B. Cherry and A. E. Bacevice Jr.** Effects of advancing pregnancy on left ventricular function during bicycle exercise. *Am.J.Cardiol.* 1994. 73:609-610 |
| **J. C. Young and J. L. Treadway.** The effect of prior exercise on oral glucose tolerance in late gestational women. *Eur.J.Appl.Physiol.Occup.Physiol.* 1992. 64:430-433 |
| **J. C. Young and J. L. Treadway.** The effect of prior exercise on oral glucose tolerance in late gestational women. 1992. 64:430-433 |
| **J. Delaney.** Participation in sports and exercise during pregnancy. 1995. 10:8-9 2 |
| **J. Dotlic, M. Terzic, D. Babic, et al.** Influence of lifestyle habits and behaviours on quality of life during pregnancy. 2012. 6:3987-3994 |
| **J. E. Martin, A. J. Hure, L. Macdonald-Wicks, R. Smith and C. E. Collins.** Predictors of post-partum weight retention in a prospective longitudinal study. 2014. 10:496-509 |
| **J. Erneszt and L. Szanyi.** Experimentation for determination of the loading capacity of cardiopathic pregnant women with analysis of the carotid pulse curve during pregnancy]. *Minerva Ginecol.* 1972. 24:1-5 |
| **J. F. Clapp 3 and Clapp,James F.,,3rd.** Long-term outcome after exercising throughout pregnancy: fitness and cardiovascular risk. *American Journal of Obstetrics & Gynecology.* 2008. 199:489.e6 |
| **J. F. Clapp 3 and E. L. Capeless.** Neonatal morphometrics after endurance exercise during pregnancy. *American Journal of Obstetrics & Gynecology.* 1990. 163:1805-1811 |
| **J. F. Clapp 3 and E. L. Capeless.** The changing glycemic response to exercise during pregnancy. *American Journal of Obstetrics & Gynecology.* 1991. 165:1678-1683 |
| **J. F. Clapp 3 and K. H. Rizk.** Effect of recreational exercise on midtrimester placental growth. *American Journal of Obstetrics & Gynecology.* 1992. 167:1518-1521 |
| **J. F. Clapp 3 and S. Dickstein.** Endurance exercise and pregnancy outcome. *Medicine & Science in Sports & Exercise.* 1984. 16:556-562 |
| **J. F. Clapp 3, H. Kim, B. Burciu and B. Lopez.** Beginning regular exercise in early pregnancy: effect on fetoplacental growth. *American Journal of Obstetrics & Gynecology.* 2000. 183:1484-1488 |
| **J. F. Clapp 3, H. Kim, B. Burciu, S. Schmidt, K. Petry and B. Lopez.** Continuing regular exercise during pregnancy: effect of exercise volume on fetoplacental growth. *American Journal of Obstetrics & Gynecology.* 2002. 186:142-147 |
| **J. F. Clapp 3, K. D. Little and E. L. Capeless.** Fetal heart rate response to sustained recreational exercise. *American Journal of Obstetrics & Gynecology.* 1993. 168:198-206 |
| **J. F. Clapp 3, K. D. Little and J. A. Widness.** Effect of maternal exercise and fetoplacental growth rate on serum erythropoietin concentrations. *American Journal of Obstetrics & Gynecology.* 2003. 188:1021-1025 |
| **J. F. Clapp 3, K. D. Little, S. Appleby-Wineberg and J. A. Widness.** The effect of regular maternal exercise on erythropoietin in cord blood and amniotic fluid. *American Journal of Obstetrics & Gynecology.* 1995. 172:1445-1451 |
| **J. F. Clapp 3, S. Simonian, B. Lopez, S. Appleby-Wineberg and R. Harcar-Sevcik.** The one-year morphometric and neurodevelopmental outcome of the offspring of women who continued to exercise regularly throughout pregnancy. *American Journal of Obstetrics & Gynecology.* 1998. 178:594-599 |
| **J. F. Clapp 3, W. Stepanchak, J. Tomaselli, M. Kortan and S. Faneslow.** Portal vein blood flow-effects of pregnancy, gravity, and exercise. *American Journal of Obstetrics & Gynecology.* 2000. 183:167-172 |
| **J. F. Clapp 3.** Fetal heart rate response to running in midpregnancy and late pregnancy. *American Journal of Obstetrics & Gynecology.* 1985. 153:251-252 |
| **J. F. Clapp 3.** Morphometric and neurodevelopmental outcome at age five years of the offspring of women who continued to exercise regularly throughout pregnancy. *J.Pediatr.* 1996. 129:856-863 |
| **J. F. Clapp 3.** NIHMS91250 PMC2650435; Long-term outcome after exercising throughout pregnancy: fitness and cardiovascular risk. *American Journal of Obstetrics & Gynecology.* 2008. 199:489.e1-489.e6 |
| **J. F. Clapp 3.** Oxygen consumption during treadmill exercise before, during, and after pregnancy. *American Journal of Obstetrics & Gynecology.* 1989. 161:1458-1464 |
| **J. F. Clapp 3.** The changing thermal response to endurance exercise during pregnancy. *American Journal of Obstetrics & Gynecology.* 1991. 165:1684-1689 |
| **J. F. Clapp 3.** The course of labor after endurance exercise during pregnancy. *American Journal of Obstetrics & Gynecology.* 1990. 163:1799-1805 |
| **J. F. Clapp 3.** The effects of maternal exercise on early pregnancy outcome. *American Journal of Obstetrics & Gynecology.* 1989. 161:1453-1457 |
| **J. F. Clapp 3rd and E. Capeless.** The VO2max of recreational athletes before and after pregnancy. 1991. 23:1128-1133 |
| **J. F. Clapp 3rd and E. L. Capeless.** The changing glycemic response to exercise during pregnancy. 1991. 165:1678-1683 |
| **J. F. Clapp 3rd and K. H. Rizk.** Effect of recreational exercise on midtrimester placental growth. 1992. 167:1518-1521 |
| **J. F. Clapp 3rd and W. Kiess.** Effects of pregnancy and exercise on concentrations of the metabolic markers tumor necrosis factor alpha and leptin. 2000. 182:300-306 |
| **J. F. Clapp 3rd, K. D. Little and J. A. Widness.** Effect of maternal exercise and fetoplacental growth rate on serum erythropoietin concentrations. 2003. 188:1021-1025 |
| **J. F. Clapp 3rd, M. Wesley and R. H. Sleamaker.** Thermoregulatory and metabolic responses to jogging prior to and during pregnancy. 1987. 19:124-130 |
| **J. F. Clapp 3rd.** Effect of dietary carbohydrate on the glucose and insulin response to mixed caloric intake and exercise in both nonpregnant and pregnant women. 1998. 21 Suppl 2:B107-12 |
| **J. F. Clapp 3rd.** Long-term outcome after exercising throughout pregnancy: fitness and cardiovascular risk. 2008. 199:489.e1-489.e6 |
| **J. F. Clapp 3rd.** Maternal heart rate in pregnancy. 1985. 152:659-660 |
| **J. F. Clapp 3rd.** Morphometric and neurodevelopmental outcome at age five years of the offspring of women who continued to exercise regularly throughout pregnancy. 1996. 129:856-863 |
| **J. F. Clapp 3rd.** Oxygen consumption during treadmill exercise before, during, and after pregnancy. 1989. 161:1458-1464 |
| **J. F. Clapp 3rd.** The changing thermal response to endurance exercise during pregnancy. 1991. 165:1684-1689 |
| **J. F. Clapp 3rd.** The effects of maternal exercise on early pregnancy outcome. 1989. 161:1453-1457 |
| **J. F. Clapp and K. D. Little.** Effect of recreational exercise on pregnancy weight gain and subcutaneous fat deposition. *Med.Sci.Sports Exerc.* 1995. 27:170-177 |
| **J. F. Clapp Iii and B. Lopez.** Size at birth, obesity and blood pressure at age five. *Metabolic Syndrome & Related Disorders.* 2007. 5:116-126 |
| **J. F. Clapp, M. Wesley and R. H. Sleamaker.** Thermoregulatory and metabolic responses to jogging prior to and during pregnancy. / Reponses thermoregulatoires et metaboliques au jogging, avant et pendant la grossesse. *Medicine & Science in Sports & Exercise.* 1987. 19:124-130 |
| **J. G. Jelsma, K. M. van Leeuwen, N. Oostdam, et al.** PMC4738738; Beliefs, Barriers, and Preferences of European Overweight Women to Adopt a Healthier Lifestyle in Pregnancy to Minimize Risk of Developing Gestational Diabetes Mellitus: An Explorative Study. *Journal of Pregnancy.* 2016. 2016:3435791 |
| **J. G. Kemp, F. A. Greer and L. A. Wolfe.** Acid-base regulation after maximal exercise testing in late gestation. *J.Appl.Physiol.* 1997. 83:644-651 |
| **J. G. Logan and S. Yeo.** Effects of Stretching Exercise on Heart Rate Variability During Pregnancy. *J.Cardiovasc.Nurs.* 2016. 2:2 |
| **J. Gofin.** The effect on birth weight of employment during pregnancy. *J.Biosoc.Sci.* 1979. 11:259-267 |
| **J. Goy, L. Dodds, M. W. Rosenberg and W. D. King.** Health-risk behaviours: examining social disparities in the occurrence of stillbirth. 2008. 22:314-320 |
| **J. H. Kim, R. J. Roberge and J. B. Powell.** Effect of external airflow resistive load on postural and exercise-associated cardiovascular and pulmonary responses in pregnancy: a case control study. 2015. 15:45 |
| **J. H. Liu, E. J. Mayer-Davis, R. R. Pate, A. E. Gallagher and J. L. Bacon.** Physical activity during pregnancy is associated with reduced fasting insulin--the Pilot Pregnancy and Active Living Study. 2010. 23:1249-1252 |
| **J. Huberty, D. Dinkel, M. W. Beets and J. Coleman.** Describing the use of the internet for health, physical activity, and nutrition information in pregnant women. 2013. 17:1363-1372 |
| **J. J. Newham, C. Allan, P. Leahy-Warren, D. Carrick-Sen and F. Alderdice.** Intentions Toward Physical Activity and Resting Behavior in Pregnant Women: Using the Theory of Planned Behavior Framework in a Cross-Sectional Study. *Birth.* 2016. 43:49-57 |
| **J. J. Pomerance, L. Gluck and V. A. Lynch.** Maternal exercise as a screening test for uteroplacental insufficiency. *Obstetrics & Gynecology.* 1974. 44:383-387 |
| **J. J. Pomerance, L. Gluck and V. A. Lynch.** Physical fitness in pregnancy: its effect on pregnancy outcome. *American Journal of Obstetrics & Gynecology.* 1974. 119:867-876 |
| **J. Jurewicz, W. Hanke, T. Makowiec-Dabrowska and J. Kalinka.** Heaviness of the work measured by energy expenditure during pregnancy and its effect on birth weight]. *Ginekol.Pol.* 2006. 77:537-542 |
| **J. Kluge, D. Hall, Q. Louw, G. Theron and D. Grove.** Specific exercises to treat pregnancy-related low back pain in a South African population. 2011. 113:187-191 |
| **J. L. Huberty, M. P. Buman, J. A. Leiferman, J. Bushar and M. A. Adams.** Trajectories of objectively-measured physical activity and sedentary time over the course of pregnancy in women self-identified as inactive. *Preventive Medicine Reports.* 2016. 3:353-360 |
| **J. L. Kraschnewski, C. H. Chuang, D. S. Downs, et al.** Association of prenatal physical activity and gestational weight gain: results from the first baby study. 2013. 23:e233-8 |
| **J. Langhoff-Roos, G. Lindmark, E. Kylberg and M. Gebre-Medhin.** Energy intake and physical activity during pregnancy in relation to maternal fat accretion and infant birthweight. *British Journal of Obstetrics & Gynaecology.* 1987. 94:1178-1185 |
| **J. Leiferman, T. Swibas, K. Koiness, J. A. Marshall and A. L. Dunn.** My baby, my move: examination of perceived barriers and motivating factors related to antenatal physical activity. 2011. 56:33-40 |
| **J. Leng, G. Liu, C. Zhang, et al.** Physical activity, sedentary behaviors and risk of gestational diabetes mellitus: a population-based cross-sectional study in Tianjin, China. *European Journal of Endocrinology.* 2016. 174:763-773 |
| **J. Liu, J. N. Laditka, E. J. Mayer-Davis and R. R. Pate.** Does physical activity during pregnancy reduce the risk of gestational diabetes among previously inactive women?. 2008. 35:188-195 |
| **J. Liu, J. N. Laditka, E. Mayer-Davis and R. R. Pate.** Physical activity during pregnancy may reduce risk of gestational diabetes among previously inactive women. *Diabetes.* 2006. 55:A418-A418 |
| **J. Liu, S. N. Blair, Y. Teng, A. R. Ness, D. A. Lawlor and C. Riddoch.** Physical activity during pregnancy in a prospective cohort of British women: results from the Avon longitudinal study of parents and children. 2011. 26:237-247 |
| **J. Lutter.** Fetal outcome of women who ran while pregnant: a preliminary report. *Melpomene Report.* 1984. 3:6-8 |
| **J. M. Catov, R. B. Ness, M. F. Wellons, D. R. Jacobs, J. M. Roberts and E. P. Gunderson.** Prepregnancy lipids related to preterm birth risk: the coronary artery risk development in young adults study. 2010. 95:3711-3718 |
| **J. M. DiNallo, D. S. Downs and G. Le Masurier.** Objectively assessing treadmill walking during the second and third pregnancy trimesters. *Journal of Physical Activity & Health.* 2012. 9:21-28 |
| **J. M. DiNallo, D. S. Downs and G. Le Masurier.** Objectively assessing treadmill walking during the second and third pregnancy trimesters. 2012. 9:21-28 |
| **J. M. DiNallo, G. C. Le Masurier, N. I. Williams and D. S. Downs.** Walking for health in pregnancy: assessment by indirect calorimetry and accelerometry. 2008. 79:28-35 |
| **J. M. Dodd, A. R. Deussen, I. Mohamad, et al.** NIHMS777629 Available on 01/01/17] PMC4859433 Available on 01/01/17]; The effect of antenatal lifestyle advice for women who are overweight or obese on secondary measures of neonatal body composition: the LIMIT randomised trial. *BJOG: An International Journal of Obstetrics & Gynaecology.* 2016. 123:244-253 |
| **J. M. Dodd, C. Cramp, Z. Sui, et al.** The effects of antenatal dietary and lifestyle advice for women who are overweight or obese on maternal diet and physical activity: the LIMIT randomised trial. 2014. 12:161 |
| **J. M. Dodd, R. M. Grivell and J. A. Owens.** Antenatal Dietary and Lifestyle Interventions for Women Who are Overweight or Obese: Outcomes from the LIMIT Randomized Trial. 2014. 3:392-399 |
| **J. M. Kinder, T. T. Jiang, J. M. Ertelt, et al.** NIHMS707202 Available on 07/30/16] PMC4522363 Available on 07/30/16]; Cross-Generational Reproductive Fitness Enforced by Microchimeric Maternal Cells. *Cell.* 2015. 162:505-515 |
| **J. M. Nicklas, L. J. Miller, C. A. Zera, R. B. Davis, S. E. Levkoff and E. W. Seely.** Factors associated with depressive symptoms in the early postpartum period among women with recent gestational diabetes mellitus. 2013. 17:1665-1672 |
| **J. M. Pivarnik, A. D. Stein and J. M. Rivera.** Effect of pregnancy on heart rate/oxygen consumption calibration curves. *Medicine & Science in Sports & Exercise.* 2002. 34:750-755 6p |
| **J. M. Pivarnik, A. D. Stein and J. M. Rivera.** Effect of pregnancy on heart rate/oxygen consumption calibration curves. 2002. 34:750-755 |
| **J. M. Pivarnik, L. M. Mudd, E. E. White, R. A. Schlaff and K. L. Peyer.** Physical activity during pregnancy and offspring characteristics at 8-10 years. *Journal of Sports Medicine & Physical Fitness.* 2014. 54:672-679 |
| **J. M. Pivarnik, M. B. Mauer, N. A. Ayres, B. Kirshon, G. A. Dildy and D. B. Cotton.** Effects of chronic exercise on blood volume expansion and hematologic indices during pregnancy. *Obstetrics & Gynecology.* 1994. 83:265-269 |
| **J. M. Pivarnik, N. A. Ayres, M. B. Mauer, D. B. Cotton, B. Kirshon and G. A. Dildy.** Effects of maternal aerobic fitness on cardiorespiratory responses to exercise. / Effets de la condition aerobie maternelle sur les reponses cardiorespiratoires a l ' exercice. *Medicine & Science in Sports & Exercise.* 1993. 25:993-998 |
| **J. M. Pivarnik, W. Lee and J. F. Miller.** Physiological and perceptual responses to cycle and treadmill exercise during pregnancy. 1991. 23:470-475 |
| **J. M. Pivarnik, W. Lee, J. F. Miller and J. Werch.** Alterations in plasma volume and protein during cycle exercise throughout pregnancy. 1990. 22:751-755 |
| **J. M. Pivarnik, W. Lee, S. L. Clark, D. B. Cotton, H. T. Spillman and J. F. Miller.** Cardiac output responses of primigravid women during exercise determined by the direct Fick technique. *Obstetrics & Gynecology.* 1990. 75:954-959 |
| **J. M. Pivarnik, W. Lee, T. Spillman, S. L. Clark, D. B. Cotton and J. F. Miller.** Maternal respiration and blood-gases during aerobic exercise performed at moderate altitude. *Med.Sci.Sports Exerc.* 1992. 24:868-872 |
| **J. M. Schlütter, I. Kirkegaard, A. S. Ferreira, et al.** The Number of Endovascular Trophoblasts in Maternal Blood Increases Overnight and after Physical Activity: An Experimental Study. *Fetal.Diagn.Ther.* 2015. |
| **J. M. Schlutter, I. Kirkegaard, L. Hatt, B. Christensen, S. Kolvraa and N. Uldbjerg.** The number of fetal cells in maternal blood increases overnight and after exercise. *Prenat.Diagn.* 2012. 32:23 |
| **J. M. Schlutter, L. Hatt, C. Bach, I. Kirkegaard, S. Kolvraa and N. Uldbjerg.** The cell-free fetal DNA fraction in maternal blood decreases after physical activity. *Prenat.Diagn.* 2014. 34:341-344 |
| **J. M. Walsh, C. McGowan, J. Byrne and F. M. McAuliffe.** Prevalence of physical activity among healthy pregnant women in Ireland. 2011. 114:154-155 |
| **J. M. Wright, C. S. Hoffman, M. J. Nieuwenhuijsen and D. A. Savitz.** The Effect of Swimming During Pregnancy on Fetal Growth. *Water Quality Exposure and Health.* 2011. 3:217-223 |
| **J. Makela, H. Lagstrom, A. Kaljonen, O. Simell and H. Niinikoski.** Hyperglycemia and lower diet quality in pregnant overweight women and increased infant size at birth and at 13 months of age--STEPS study. 2013. 89:439-444 |
| **J. Marcinkevage, A. Correa, U. Ramakrishnan, A. Sharma, K. M. V. Narayan and G. Umpierrez.** Physical activity behaviors and blood glucose levels during first trimester of pregnancy in Urban black women. *Diabetes.* 2012. 61:A636-A637 |
| **J. Marcinkevage, A. Correa, U. Ramakrishnan, A. Sharma, K. M. Venkat Narayan and G. Umpierrez.** Reducing sedentary behavior and increasing physical activity during pregnancy: A feasibility study. *Diabetes.* 2012. 61:A344 |
| **J. N. Olayiwola, O. C. Irizarry, K. O'Connell and S. Milan.** Living Smart, Living Fit: a patient-centered program to improve perinatal outcomes in a community health center population. 2013. 4:31-35 |
| **J. N. Watts, Y. D. Miller and A. L. Marshall.** Depressive symptoms during pregnancy: Exploring the role of sitting. 2013. 6:36-42 |
| **J. Newham, J. Hurley, A. Wittkowski, J. D. Aplin and M. Westwood.** Initials findings of CALMA study (Can Antenatal Yoga Lower Maternal Anxiety). *Journal of Reproductive and Infant Psychology.* 2011. 29 (3):e29-e30 |
| **J. Newham, M. Westwood, A. Wittkowski and J. Aplin.** Efficacy of yoga in reducing maternal anxiety in pregnancy. *Journal of Reproductive and Infant Psychology.* 2010. 28 (3):e13 |
| **J. Orskou, T. B. Henriksen, U. Kesmodel and N. J. Secher.** Maternal characteristics and lifestyle factors and the risk of delivering high birth weight infants. *Obstetrics & Gynecology.* 2003. 102:115-120 |
| **J. P. Manshande, R. Eeckels, V. Manshande-Desmet and R. Vlietinck.** Rest versus heavy work during the last weeks of pregnancy: influence on fetal growth. *British Journal of Obstetrics & Gynaecology.* 1987. 94:1059-1067 |
| **J. P. Manshande, R. Eeckels, V. Manshande-Desmet and R. Vlietinck.** Rest versus heavy work during the last weeks of pregnancy: influence on fetal growth. 1987. 94:1059-1067 |
| **J. P. Pirhonen, P. G. Lindqvist and K. Marsal.** A longitudinal study of maternal oxygen saturation during short-term submaximal exercise. *Clinical Physiology & Functional Imaging.* 2003. 23:37-41 |
| **J. Parizkova and R. Petrasek.** The impact of daily work load during pregnancy on lipid metabolism in the liver of the offspring. *Bibl.Nutr.Dieta.* 1979. 57-64 |
| **J. Pomeroy, F. Renstrom, A. M. Gradmark, et al.** Maternal physical activity and insulin action in pregnancy and their relationships with infant body composition. 2013. 36:267-269 |
| **J. R. Ruiz, M. Perales, M. Pelaez, C. Lopez, A. Lucia and R. Barakat.** Supervised exercise-based intervention to prevent excessive gestational weight gain: A randomized controlled trial. *Mayo Clin.Proc.* 2013. 88:1388-1397 |
| **J. S. Arfi and G. Peres.** Maternal and fetal heart rates during bicycle ergometer exercise]. *J.Gynecol.Obstet.Biol.Reprod.* 1986. 15:281-286 |
| **J. S. Haas, E. Fuentes-Afflick, A. L. Stewart, et al.** Prepregnancy health status and the risk of preterm delivery. 2005. 159:58-63 |
| **J. S. Savage, D. S. Downs, Y. Dong and D. E. Rivera.** PMC4056194; Control systems engineering for optimizing a prenatal weight gain intervention to regulate infant birth weight. *Am.J.Public Health.* 2014. 104:1247-1254 |
| **J. S. Tavares, A. S. O. Melo, M. M. R. Amorim, et al.** Physical activity patterns in pregnant women attending the family health program of Campina Grande - PB. *Revista Brasileira de Epidemiologia.* 2009. 12:10-19 |
| **J. Smedley, J. M. Jancey, S. Dhaliwal, Y. Zhao, S. M. D. R. Monteiro and P. Howat.** Women's reported health behaviours before and during pregnancy: A retrospective study. 2014. 73:28-40 |
| **J. T. Bambicini, V. C. M. Soares, M. R. D. Zanetti, M. R. Torloni, M. C. Ribeiro and R. Mattar.** Effects of aerobic and resistance exercises on glycemic levels of patients with gestational diabetes: Pilot study. *International Journal of Gynecology and Obstetrics.* 2012. 119:S603 |
| **J. Tinloy, C. H. Chuang, J. Zhu, J. Pauli, J. L. Kraschnewski and K. H. Kjerulff.** NIHMS541362 Available on 01/01/15] PMC3913372 Available on 01/01/15]; Exercise during pregnancy and risk of late preterm birth, cesarean delivery, and hospitalizations. *Womens Health Issues.* 2014. 24:e99-e104 |
| **J. Van Eyck, J. Wladimiroff, M. Noordam, H. Tonge and H. Prechtl.** The blood flow velocity waveform in the fetal descending aorta: Its relationship to fetal behavioural states in normal pregnancy at 37-38 weeks. *Early Hum.Dev.* 1985. 12:137-143 |
| **J. W. Van Hook, P. Gill, T. R. Easterling, B. Schmucker, K. Carlson and T. J. Benedetti.** The hemodynamic effects of isometric exercise during late normal pregnancy. 1993. 169:870-873 |
| **J. W. Vanhook, P. Gill, T. R. Easterling, B. Schmucker, K. Carlson and T. J. Benedetti.** THE HEMODYNAMIC-EFFECTS OF ISOMETRIC-EXERCISE DURING LATE NORMAL-PREGNANCY. 1993. 169:870-873 |
| **J. Zhang and D. A. Savitz.** Exercise during pregnancy among US women. *Ann.Epidemiol.* 1996. 6:53-59 |
| **James J. Newham, Carly Allan, Patricia Leahy-Warren, Debbie Carrick-Sen and Fiona Alderdice.** Intentions toward physical activity and resting behavior in pregnant women: Using the theory of planned behavior framework in a cross-sectional study. *Birth: Issues in Perinatal Care.* 2016. 43:49-57 |
| **Jan Pryor.** Physical and behavioural correlates of 12-month development in small-for-gestational age and appropriately grown infants. 1996. 14:233-242 |
| **Janet Baker.** Developing a care pathway for obese women in pregnancy and beyond. 2011. 19:632-643 12 |
| **Jennifer Jones, Jeff Housman and Willis McAleese.** Exercise, nutrition, and weight management during pregnancy. 2010. 25:120-128 |
| **Jihong Liu, Sara Wilcox, Kara Whitaker, Christine Blake and Cheryl Addy.** Preventing excessive weight gain during pregnancy and promoting postpartum weight loss: A pilot lifestyle intervention for overweight and obese African American women. 2015. 19:840-849 |
| **Joellen W. Hawkins, Cynthia S. Aber, Alice Cannan, Christine M. Coppinger and Kathleen O'Brien Rafferty.** Women's reported self-care behaviors during pregnancy. 1998. 19:529-538 |
| **Jonathan Y. Huang, Dodie Arnold, Chun-fang Qiu, Raymond S. Miller, Michelle A. Williams and Daniel A. Enquobahrie.** Association of Serum Vitamin D with Symptoms of Depression and Anxiety in Early Pregnancy. 2014. 23:588-595 8 |
| **Jovita A. Daniel, K. Venkateswarlu and Clifford C. Ezeugwu.** Effect of Aerobic Dance Exercise on Blood Pressure of Normotensive Pregnant Women Diagnosed with Gestational Diabetes at Federal Medical Centre, Owerri, South East Nigeria. *Indian Journal of Physiotherapy & Occupational Therapy.* 2015. 9:124-128 |
| **Juan Dertkigil San, J. G. Cecatti, M. A. Sarno, S. R. Cavalcante and E. F. Marussi.** Variation in the amniotic fluid index following moderate physical activity in water during pregnancy. *Acta Obstet.Gynecol.Scand.* 2007. 86:547-552 |
| **K. A. Cooper, M. E. O'Neill, S. N. Hunyor and E. S. Boyce.** Hemodynamic responses of trained and sedentary pregnant women to semi-supine cycling. *Journal of Sports Medicine & Physical Fitness.* 1993. 33:203-204 |
| **K. A. Cooper, S. N. Hunyor, E. S. Boyce, M. E. O'Neill and D. B. Frewin.** Fetal heart rate and maternal cardiovascular and catecholamine responses to dynamic exercise. *Aust.N.Z.J.Obstet.Gynaecol.* 1987. 27:220-223 |
| **K. A. Matthews and J. Rodin.** Pregnancy alters blood pressure responses to psychological and physical challenge. *Psychophysiology.* 1992. 29:232-240 |
| **K. A. Salvesen and S. Morkved.** Randomised controlled trial of pelvic floor muscle training during pregnancy. *Br.Med.J.* 2004. 329:378-380 |
| **K. A. Salvesen, S. N. Stafne, T. M. Eggebo and S. Morkved.** Does regular exercise in pregnancy influence duration of labor? A secondary analysis of a randomized controlled trial. *Acta Obstet.Gynecol.Scand.* 2014. 93:73-79 |
| **K. A. Sauder, A. P. Starling, A. L. Shapiro, et al.** NIHMS788628 Available on 05/01/17] PMC4883104 Available on 05/01/17]; Diet, physical activity and mental health status are associated with dysglycaemia in pregnancy: the Healthy Start Study. *Diabetic Med.* 2016. 33:663-667 |
| **K. A. Webb, L. A. Wolfe and M. J. McGrath.** Effects of acute and chronic maternal exercise on fetal heart rate. *J.Appl.Physiol.* 1994. 77:2207-2213 |
| **K. B. Lesser, P. A. Gruppuso, R. B. Terry and M. W. Carpenter.** Exercise fails to improve postprandial glycemic excursion in women with gestational diabetes. *J.Matern.Fetal.* 1996. 5:211-217 |
| **K. Baptiste-Roberts, P. Ghosh and W. K. Nicholson.** PMC3236988; Pregravid physical activity, dietary intake, and glucose intolerance during pregnancy. *Journal of Women's Health.* 2011. 20:1847-1851 |
| **K. Baptiste-Roberts, P. Ghosh and W. K. Nicholson.** Pregravid physical activity, dietary intake, and glucose intolerance during pregnancy. 2011. 20:1847-1851 |
| **K. Bo and L. A. Haakstad.** Is pelvic floor muscle training effective when taught in a general fitness class in pregnancy? A randomised controlled trial. 2011. 97:190-195 |
| **K. Bo, C. Fleten and W. Nystad.** Effect of antenatal pelvic floor muscle training on labor and birth. 2009. 113:1279-1284 |
| **K. Bo, G. Hilde, J. Staer-Jensen, F. Siafarikas, M. K. Tennfjord and M. E. Engh.** Does general exercise training before and during pregnancy influence the pelvic floor "opening" and delivery outcome? A 3D/4D ultrasound study following nulliparous pregnant women from mid-pregnancy to childbirth. *Br.J.Sports Med.* 2015. 49:196-199 |
| **K. Bø, L. A. H. Haakstad and N. Volder.** Do pregnant women exercise their pelvic floor muscles?. 2007. 18:733-736 |
| **K. Borodulin, K. R. Evenson and A. H. Herring.** PMC2784751; Physical activity patterns during pregnancy through postpartum. *BMC Womens Health.* 2009. 9:32 |
| **K. Borodulin, K. R. Evenson, K. Monda, F. Wen, A. H. Herring and N. Dole.** Physical activity and sleep among pregnant women. 2010. 24:45-52 |
| **K. Broekhuizen, E. Althuizen, M. N. van Poppel, M. Donker and W. van Mechelen.** From theory to practice: intervention fidelity in a randomized controlled trial aiming to optimize weight development during pregnancy. 2012. 13:816-825 |
| **K. C. Vollebregt, H. Wolf, K. Boer, van der Wal, M. F., T. G. Vrijkotte and G. J. Bonsel.** Does physical activity in leisure time early in pregnancy reduce the incidence of preeclampsia or gestational hypertension?. 2010. 89:261-267 |
| **K. E. Brett, Z. M. Ferraro, M. Holcik and K. B. Adamo.** Prenatal physical activity and diet composition affect the expression of nutrient transporters and mTOR signaling molecules in the human placenta. *Placenta.* 2015. 36:204-212 |
| **K. E. Joung, K. H. Park, A. Filippaios, F. Dincer, H. Christou and C. S. Mantzoros.** Cord blood irisin levels are positively correlated with birth weight in newborn infants. *Metabolism: Clinical and Experimental.* 2015. 64:1507-1514 |
| **K. E. Lynch, J. R. Landsbaugh, B. W. Whitcomb, P. Pekow, G. Markenson and L. Chasan-Taber.** Physical Activity of Pregnant Hispanic Women. *Am.J.Prev.Med.* 2012. 43:434-439 |
| **K. E. Sørensen and K. G. Børlum.** Fetal heart function in response to short-term maternal exercise. *Br.J.Obstet.Gynaecol.* 1986. 93:310-313 |
| **K. Eliasson, I. Nordlander, B. Larson, M. Hammarstrom and E. Mattsson.** Influence of physical activity on urinary leakage in primiparous women. 2005. 15:87-94 |
| **K. Eliasson, I. Nordlander, E. Mattsson, B. Larson and M. Hammarstrom.** Prevalence of urinary leakage in nulliparous women with respect to physical activity and micturition habits. 2004. 15:149-153 |
| **K. F. Foxcroft, I. J. Rowlands, N. M. Byrne, H. D. McIntyre, L. K. Callaway and Bambino group.** Exercise in obese pregnant women: the role of social factors, lifestyle and pregnancy symptoms. 2011. 11:4 |
| **K. F. Koltyn.** Mood changes in pregnant women following an exercise session and a prenatal information session. 1994. 4:191-195 |
| **K. F. Putnam, L. A. Mueller, E. F. Magann, et al.** Evaluating effects of self-reported domestic physical activity on pregnancy and neonatal outcomes in "stay at home" military wives. *Mil.Med.* 2013. 178:893-898 |
| **K. Fieril, A. Glantz and M. Fagevik Olsen.** Hemodynamic responses to single sessions of aerobic exercise and resistance exercise in pregnancy. *Acta Obstet.Gynecol.Scand.* 2016. 21:21 |
| **K. Godfrey, K. Walker-Bone, S. Robinson, et al.** Neonatal bone mass: influence of parental birthweight, maternal smoking, body composition, and activity during pregnancy. *Journal of Bone & Mineral Research.* 2001. 16:1694-1703 |
| **K. H. Paul, M. L. Graham and C. M. Olson.** The web of risk factors for excessive gestational weight gain in low income women. 2013. 17:344-351 |
| **K. Haby, A. Glantz, R. Hanas and A. Premberg.** Mighty Mums - An antenatal health care intervention can reduce gestational weight gain in women with obesity. 2015. 31:685-692 |
| **K. Ihrman.** A clinical and physiological study of pregnancy in a material from northern Sweden. VIII. The effect of physical training during pregnancy on the circulatory adjustment. *Acta Soc.Med.Ups.* 1960. 65:335-347 |
| **K. J. Guelfi and R. E. Halse.** Moderate-intensity exercise affects perceived hunger and fullness but not appetite-related hormones in late pregnancy. 2013. 38:1162-1165 |
| **K. J. Guelfi, C. Wang, J. A. Dimmock, B. Jackson, J. P. Newnham and H. Yang.** PMC4689036; A comparison of beliefs about exercise during pregnancy between Chinese and Australian pregnant women. *BMC Pregnancy & Childbirth.* 2015. 15:345 |
| **K. J. Guelfi, M. J. Ong, P. A. Fournier, et al.** Does supervised home-based exercise during pregnancy reduce the recurrence of gestational diabetes? A randomised controlled trial. *J.Paediatr.Child Health.* 2015. 51:35 |
| **K. K. Garnaes, S. Morkved, O. Salvesen and T. Moholdt.** Exercise Training and Weight Gain in Obese Pregnant Women: A Randomized Controlled Trial (ETIP Trial). *PLoS Medicine / Public Library of Science.* 2016. 13:e1002079 |
| **K. Kumareswaran, D. Elleri, J. M. Allen, et al.** Accuracy of continuous glucose monitoring during exercise in type 1 diabetes pregnancy. 2013. 15:223-229 |
| **K. Kumareswaran, D. Elleri, J. M. Allen, et al.** Physical activity energy expenditure and glucose control in pregnant women with type 1 diabetes: is 30 minutes of daily exercise enough?. 2013. 36:1095-1101 |
| **K. L. Kong, C. Campbell, K. Wagner, A. Peterson and L. Lanningham-Foster.** Impact of a walking intervention during pregnancy on post-partum weight retention and infant anthropometric outcomes. *Journal of developmental origins of health and disease.* 2014. 5:259-267 |
| **K. L. Kong, C. G. Campbell, R. C. Foster, A. D. Peterson and L. Lanningham-Foster.** A pilot walking program promotes moderate-intensity physical activity during pregnancy. *Medicine & Science in Sports & Exercise.* 2014. 46:462-471 |
| **K. L. Kong, M. W. Gillman, S. Rifas-Shiman and X. Wen.** Leisure time physical activity before and during mid-pregnancy and offspring adiposity in mid-childhood. *Pediatric Obesity.* 2015. |
| **K. L. Lindsay, C. Heneghan, B. McNulty, L. Brennan and F. M. McAuliffe.** Lifestyle and dietary habits of an obese pregnant cohort. 2015. 19:25-32 |
| **K. L. Lindsay, C. Heneghan, C. A. McGowan, L. Brennan and F. M. McAuliffe.** Lifestyle habits in obese pregnancy: A case-control study. *Archives of Disease in Childhood: Fetal and Neonatal Edition.* 2013. 98: |
| **K. Lagana.** Come bien, camina y no se preocupe--eat right, walk, and do not worry: selective biculturalism during pregnancy in a Mexican American community. 2003. 14:117-124 |
| **K. M. Borodulin, K. R. Evenson, F. Wen, A. H. Herring and A. M. Benson.** NIHMS366602 PMC3319731; Physical activity patterns during pregnancy. *Medicine & Science in Sports & Exercise.* 2008. 40:1901-1908 |
| **K. M. Borodulin, K. R. Evenson, F. Wen, A. H. Herring and A. M. Benson.** Physical activity patterns during pregnancy. 2008. 40:1901-1908 |
| **K. M. Gustafson, L. E. May, H. W. Yeh, S. K. Million and J. J. Allen.** NIHMS474547 PMC3753784; Fetal cardiac autonomic control during breathing and non-breathing epochs: the effect of maternal exercise. *Early Hum.Dev.* 2012. 88:539-546 |
| **K. M. Owe, E. K. Bjelland, B. Stuge, N. Orsini, M. Eberhard-Gran and S. Vangen.** Exercise level before pregnancy and engaging in high-impact sports reduce the risk of pelvic girdle pain: a population-based cohort study of 39 184 women. *Br.J.Sports Med.* 2016. 50:817-822 |
| **K. M. Owe, W. Nystad and K. B.** Correlates of regular exercise during pregnancy: the Norwegian Mother and Child Cohort Study. *Scand.J.Med.Sci.Sports.* 2009. 19:637-645 |
| **K. M. Owe, W. Nystad and K. Bo.** Association between regular exercise and excessive newborn birth weight. *Obstetrics & Gynecology.* 2009. 114:770-776 |
| **K. M. Owe, W. Nystad and K. Bø.** Correlates of regular exercise during pregnancy: The Norwegian Mother and Child Cohort Study. 2009. 19:637-645 |
| **K. M. Owe, W. Nystad, R. Skjaerven, H. Stigum and K. Bo.** Exercise during pregnancy and the gestational age distribution: a cohort study. *Medicine & Science in Sports & Exercise.* 2012. 44:1067-1074 |
| **K. M. Smith and C. G. Campbell.** Physical activity during pregnancy: impact of applying different physical activity guidelines. 2013. 2013:165617 |
| **K. M. Smith, R. C. Foster and C. G. Campbell.** PMC3221627; Accuracy of physical activity assessment during pregnancy: an observational study. *BMC Pregnancy & Childbirth.* 2011. 11:86 |
| **K. Marsal, G. Gennser and O. Lofgren.** Effects on fetal breathing movements of maternal challenges. Cross-over study on dynamic work, static work, passive movements, hyperventilation and hyperoxygenation. *Acta Obstet.Gynecol.Scand.* 1979. 58:335-342 |
| **K. Marsal, O. Lofgren and G. Gennser.** Fetal breathing movements and maternal exercise. *Acta Obstet.Gynecol.Scand.* 1979. 58:197-201 |
| **K. Mattran, L. M. Mudd, R. A. Rudey and J. S. Kelly.** Leisure-time physical activity during pregnancy and offspring size at 18 to 24 months. *Journal of Physical Activity & Health.* 2011. 8:655-662 |
| **K. Melzer, Y. Schutz, M. Boulvain and B. Kayser.** Pregnancy-related changes in activity energy expenditure and resting metabolic rate in Switzerland. *Eur.J.Clin.Nutr.* 2009. 63:1185-1191 |
| **K. Melzer, Y. Schutz, N. Soehnchen, et al.** Effects of recommended levels of physical activity on pregnancy outcomes. *American Journal of Obstetrics & Gynecology.* 2010. 202:266.e1-266.e6 |
| **K. Morkrid, A. K. Jenum, S. Berntsen, et al.** Objectively recorded physical activity and the association with gestational diabetes. 2014. 24:e389-97 |
| **K. N. Mitchell and B. S. Macneill.** The aerobic capacity of pregnant-women during nonweight-bearing versus weight-bearing exercise. 1988. 68:860-860 |
| **K. Nelson, V. Lohsoonthorn and M. A. Williams.** Preterm delivery risk in relation to maternal occupational and leisure time physical activity among thai women. *Asian Biomedicine.* 2009. 3:267-277 |
| **K. P. Fieril, M. F. Olsén, A. Glantz and M. Larsson.** Experiences of exercise during pregnancy among women who perform regular resistance training: A qualitative study. *Phys.Ther.* 2014. 94:1135-1143 |
| **K. Petrov Fieril, A. Glantz and M. Fagevik Olsen.** The efficacy of moderate-to-vigorous resistance exercise during pregnancy: a randomized controlled trial. *Acta Obstet.Gynecol.Scand.* 2015. 94:35-42 |
| **K. Phan, P. Bidulka, Y. H. Gomez, et al.** Effect of Acute Weight Gain and Physical Activity on Arterial Stiffness in Pregnant Women at High Risk for Hypertensive Disorders of Pregnancy. *Can.J.Cardiol.* 2016. 32:S5 |
| **K. Piravej and R. Saksirinukul.** Survey of patterns, attitudes, and the general effects of exercise during pregnancy in 203 Thai pregnant women at King Chulalongkorn Memorial Hospital. *Journal of the Medical Association of Thailand.* 2001. 84 Suppl 1:S276-82 |
| **K. Polanska, P. Muszynski, W. Sobala, E. Dziewirska, D. Merecz-Kot and W. Hanke.** Maternal lifestyle during pregnancy and child psychomotor development - Polish Mother and Child Cohort study. *Early Hum.Dev.* 2015. 91:317-325 |
| **K. Przybylowicz, M. Przybylowicz, M. Grzybiak and K. Janiszewska.** Effects of physical activity during pregnancy and gestational weight gain on newborn weight and length at birth in Warminsko-Mazurskie province. *Acta Scientiarum Polonorum Technologia Alimentaria.* 2014. 13:203-211 |
| **K. R. Evenson and F. Wen.** National trends in self-reported physical activity and sedentary behaviors among pregnant women: NHANES 1999-2006. *Prev.Med.* 2010. 50:123-128 |
| **K. R. Evenson and F. Wen.** Prevalence and correlates of objectively measured physical activity and sedentary behavior among US pregnant women. *Prev.Med.* 2011. 53:39-43 |
| **K. R. Evenson, A. Siega-Riz, D. A. Savitz, J. A. Leiferman and J. M. Thorp J.** Vigorous leisure activity and pregnancy outcome. *Epidemiology.* 2002. 13:653-659 |
| **K. R. Evenson, D. A. Savitz and S. L. Huston.** Leisure-time physical activity among pregnant women in the US. 2004. 18:400-407 |
| **K. R. Heineman, S. La Bastide-Van Gemert, V. Fidler, K. J. Middelburg, A. F. Bos and M. Hadders-Algra.** Construct validity of the Infant Motor Profile: relation with prenatal, perinatal, and neonatal risk factors. 2010. 52:e209-15 |
| **K. R. Kardel, B. Johansen, N. Voldner, P. O. Iversen and T. Henriksen.** Association between aerobic fitness in late pregnancy and duration of labor in nulliparous women. *Acta Obstet.Gynecol.Scand.* 2009. 88:948-952 |
| **K. R. Kardel.** Effects of intense training during and after pregnancy in top-level athletes. *Scand.J.Med.Sci.Sports.* 2005. 15:79-86 |
| **K. R. Richardsen, I. Mdala, S. Berntsen, et al.** PMC4936091; Objectively recorded physical activity in pregnancy and postpartum in a multi-ethnic cohort: association with access to recreational areas in the neighbourhood. *International Journal of Behavioral Nutrition & Physical Activity.* 2016. 13:78 |
| **K. R. Richardsen, R. S. Falk, A. K. Jenum, et al.** PMC4962490; Predicting who fails to meet the physical activity guideline in pregnancy: a prospective study of objectively recorded physical activity in a population-based multi-ethnic cohort. *BMC Pregnancy & Childbirth.* 2016. 16:186 |
| **K. Rauh, E. Gabriel, E. Kerschbaum, et al.** PMC3718707; Safety and efficacy of a lifestyle intervention for pregnant women to prevent excessive maternal weight gain: a cluster-randomized controlled trial. *BMC Pregnancy & Childbirth.* 2013. 13:151 |
| **K. Rauh, J. Gunther, J. Kunath, L. Stecher and H. Hauner.** PMC4608142; Lifestyle intervention to prevent excessive maternal weight gain: mother and infant follow-up at 12 months postpartum. *BMC Pregnancy & Childbirth.* 2015. 15:265 |
| **K. Renault, K. Norgaard, K. R. Andreasen, N. J. Secher and L. Nilas.** Physical activity during pregnancy in obese and normal-weight women as assessed by pedometer. *Acta Obstet.Gynecol.Scand.* 2010. 89:956-961 |
| **K. Renault, K. Norgaard, N. J. Secher, K. R. Andreasen, B. Baldur-Felskov and L. Nilas.** Physical activity during pregnancy in normal-weight and obese women: compliance using pedometer assessment. 2012. 32:430-433 |
| **K. S. Haugland, S. Rasmussen and A. K. Daltveit.** Group intervention for women with pelvic girdle pain in pregnancy. A randomized controlled trial. 2006. 85:1320-1326 |
| **K. Sjogren Forss, E. Ekvall Hansson, M. Troein and L. Stjernberg.** Patterns of physical activity among women and men before and during pregnancy. 2014. 128:814-816 |
| **K. Smith, L. Lanningham-Foster, A. Welch and C. Campbell.** Web-Based Behavioral Intervention Increases Maternal Exercise but Does Not Prevent Excessive Gestational Weight Gain in Previously Sedentary Women. *Journal of Physical Activity & Health.* 2016. 13:587-593 |
| **K. Soiva, A. Salmi, M. Groenroos and T. Peltonen.** Physical Working Capacity during Pregnancy and Effect of Physical Work Tests on Foetal Heart Rate. *Ann.Chir.Gynaecol.Fenn.* 1964. 53:187-196 |
| **K. T. Kasawara, C. S. Burgos, S. L. do Nascimento, N. O. Ferreira, F. G. Surita and E. S. Pinto.** PMC3753734; Maternal and Perinatal Outcomes of Exercise in Pregnant Women with Chronic Hypertension and/or Previous Preeclampsia: A Randomized Controlled Trial. *ISRN Obstetrics & Gynecology.* 2013. 2013:857047 |
| **K. Ueland, M. J. Novy and J. Metcalfe.** Cardiorespiratory responses to pregnancy and exercise in normal women and patients with heart disease. *American Journal of Obstetrics & Gynecology.* 1973. 115:4-10 |
| **K. Ueland, M. J. Novy and J. Metcalfe.** Cardiorespiratory responses to pregnancy and exercise in normal women and patients with heart disease. 1973. 115:4-10 |
| **K. Ueland, M. J. Novy, E. N. Peterson and J. Metcalfe.** Maternal cardiovascular dynamics. IV. The influence of gestational age on the maternal cardiovascular response to posture and exercise. *American Journal of Obstetrics & Gynecology.* 1969. 104:856-864 |
| **K. Wulff and R. Siegmund.** Emergence of circadian rhythms in infants before and after birth: evidence for variations by parental influence]. *Z.Geburtshilfe Neonatol.* 2002. 206:166-171 |
| **Kimberly R. Andringa, Tyler Bardsley, Amy H. Herring and SeonAe Yeo.** The Impact of Symptom Type and Frequency on Activity Level During Pregnancy. *Journal of Women's Health Physical Therapy.* 2013. 37:4-10 7p |
| **L. A. Dias, P. Driusso, D. L. Aita, S. M. Quintana, K. Bo and C. H. Ferreira.** Effect of pelvic floor muscle training on labour and newborn outcomes: a randomized controlled trial. *Revista Brasileira de Fisioterapia.* 2011. 15:487-493 |
| **L. A. D'Silva, R. E. Davies, S. J. Emery and M. J. Lewis.** Influence of somatic state on cardiovascular measurements in pregnancy. 2014. 35:15-29 |
| **L. A. Haakstad and K. Bo.** Effect of a regular exercise programme on pelvic girdle and low back pain in previously inactive pregnant women: A randomized controlled trial. 2015. 47:229-234 |
| **L. A. Haakstad and K. Bo.** Effect of regular exercise on prevention of excessive weight gain in pregnancy: a randomised controlled trial. 2011. 16:116-125 |
| **L. A. Haakstad and K. Bo.** PMC3198740; Exercise in pregnant women and birth weight: a randomized controlled trial. *BMC Pregnancy & Childbirth.* 2011. 11:66 |
| **L. A. Haakstad, E. Edvardsen and K. Bo.** Effect of regular exercise on blood pressure in normotensive pregnant women. A randomized controlled trial. *Hypertension in Pregnancy.* 2016. 35:170-180 |
| **L. A. Haakstad, I. Gundersen and K. Bo.** Self-reporting compared to motion monitor in the measurement of physical activity during pregnancy. 2010. 89:749-756 |
| **L. A. Haakstad, N. Voldner and K. Bo.** Stages of change model for participation in physical activity during pregnancy. 2013. 2013:193170 |
| **L. A. Haakstad, N. Voldner, T. Henriksen and K. Bo.** Physical activity level and weight gain in a cohort of pregnant Norwegian women. 2007. 86:559-564 |
| **L. A. Haakstad, N. Voldner, T. Henriksen and K. Bo.** Why do pregnant women stop exercising in the third trimester?. *Acta Obstet.Gynecol.Scand.* 2009. 88:1267-1275 |
| **L. A. Haakstad, N. Voldner, T. Henriksen and K. Bo.** Why do pregnant women stop exercising in the third trimester?. 2009. 88:1267-1275 |
| **L. A. Millard, D. A. Lawlor, A. Fraser and L. D. Howe.** PMC3787488; Physical activity during pregnancy and offspring cardiovascular risk factors: findings from a prospective cohort study.Erratum appears in BMJ Open. 2013;3(12):e003574corr1]. *BMJ Open.* 2013. 3:e003574 |
| **L. A. Pompeii, D. A. Savitz, K. R. Evenson, B. Rogers and M. McMahon.** Physical exertion at work and the risk of preterm delivery and small-for-gestational-age birth. *Obstetrics & Gynecology.* 2005. 106:1279-1288 |
| **L. A. Wolfe, A. P. Heenan and A. Bonen.** Aerobic conditioning effects on substrate responses during graded cycling in pregnancy. *Canadian Journal of Physiology & Pharmacology.* 2003. 81:696-703 |
| **L. A. Wolfe, A. P. Heenan and A. Bonen.** Aerobic conditioning effects on substrate responses during graded cycling in pregnancy. 2003. 81:696-703 |
| **L. A. Wolfe, R. J. Preston, G. W. Burggraf and M. J. McGrath.** Effects of pregnancy and chronic exercise on maternal cardiac structure and function. *Can.J.Physiol.Pharmacol.* 1999. 77:909-917 |
| **L. A. Wolfe, R. M. Walker, A. Bonen and M. J. McGrath.** Effects of pregnancy and chronic exercise on respiratory responses to graded exercise. 1994. 76:1928-1936 |
| **L. Atkinson, R. L. Shaw and D. P. French.** Is pregnancy a teachable moment for diet and physical activity behaviour change? An interpretative phenomenological analysis of the experiences of women during their first pregnancy. *British Journal of Health Psychology.* 2016. 11:11 |
| **L. Back, A. Hui, A. Reid, et al.** Comparison of physical activity and nutritional intake in first nations pregnant women in remote communities and urban-living pregnant women. 2012. 36:64-67 |
| **L. Baghirzada, K. N. Downey and A. J. Macarthur.** Assessment of quality of life indicators in the postpartum period. 2013. 22:209-216 |
| **L. Basso, P. T. McCollum, M. R. N. Darling, W. A. Tocchi and W. A. Tanner.** A descriptive study of pregnant women with gallstones. Relation to dietary and social habits, education, physical activity, height, and weight. 1992. 8:629-633 |
| **L. Broberg, A. S. Ersboll, M. G. Backhausen, P. Damm, A. Tabor and H. K. Hegaard.** Compliance with national recommendations for exercise during early pregnancy in a Danish cohort. 2015. 15:317 |
| **L. C. Silveira and C. A. Segre.** Physical exercise during pregnancy and its influence in the type of birth. 2012. 10:409-414 |
| **L. Chasan-Taber, B. H. Marcus, E. Stanek 3, et al.** PMC2851124; A randomized controlled trial of prenatal physical activity to prevent gestational diabetes: design and methods. *Journal of Women's Health.* 2009. 18:851-859 |
| **L. Chasan-Taber, M. D. Schmidt, P. Pekow, B. Sternfeld, J. Manson and G. Markenson.** Correlates of physical activity in pregnancy among Latina women. 2007. 11:353-363 |
| **L. Chasan-Taber, M. D. Schmidt, P. Pekow, et al.** Physical activity and gestational diabetes mellitus among Hispanic women. *Journal of Women's Health.* 2008. 17:999-1008 |
| **L. Chasan-Taber, M. Silveira, B. H. Marcus, B. Braun, E. Stanek and G. Markenson.** Feasibility and efficacy of a physical activity intervention among pregnant women: the behaviors affecting baby and you (B.A.B.Y.) study. *Journal of physical activity & health.* 2011. 8 Suppl 2:228 |
| **L. Chasan-Taber, M. Silveira, K. E. Lynch, et al.** Physical activity before and during pregnancy and risk of abnormal glucose tolerance among Hispanic women. *Diabetes Metab.* 2014. 40:67-75 |
| **L. Chasan-Taber, M. Silveira, K. E. Lynch, P. Pekow, C. G. Solomon and G. Markenson.** Physical activity and gestational weight gain in Hispanic women. 2014. 22:909-918 |
| **L. Chasan-Taber, M. Silveira, P. Pekow, et al.** Physical activity, sedentary behavior and risk of hypertensive disorders of pregnancy in Hispanic women. 2015. 34:1-16 |
| **L. Chasan-Taber, R. T. Fortner, A. Gollenberg, J. Buonnaccorsi, N. Dole and G. Markenson.** A prospective cohort study of modifiable risk factors for gestational diabetes among Hispanic women: design and baseline characteristics. 2010. 19:117-124 |
| **L. Chu, R. Retnakaran, B. Zinman, A. J. G. Hanley and J. K. Hamilton.** Impact of maternal physical activity and infant feeding practices on infant weight gain and adiposity. 2012. 2012: |
| **L. Currie, C. Woolcott, D. F. Fell, B. A. Armson and L. Dodds.** Physical activity and pregnancy outcomes. *Am.J.Epidemiol.* 2011. 173:S214 |
| **L. D. Devoe, M. Arthur and N. Searle.** The effects of maternal ambulation on the nonstress test. *American Journal of Obstetrics & Gynecology.* 1987. 157:240-244 |
| **L. D. Platt, R. Artal, J. Semel, L. Sipos and R. K. Kammula.** Exercise in pregnancy. II. Fetal responses. *American Journal of Obstetrics & Gynecology.* 1983. 147:487-491 |
| **L. Dibblee and T. E. Graham.** A longitudinal study of changes in aerobic fitness, body composition, and energy intake in primigravid patients. *American Journal of Obstetrics & Gynecology.* 1983. 147:908-914 |
| **L. E. May, A. Glaros, H. W. Yeh, J. F. Clapp 3 and K. M. Gustafson.** Aerobic exercise during pregnancy influences fetal cardiac autonomic control of heart rate and heart rate variability. *Early Hum.Dev.* 2010. 86:213-217 |
| **L. E. May, J. Knowlton, J. Hanson, et al.** Effects of Exercise During Pregnancy on Maternal Heart Rate and Heart Rate Variability. *Pm & R.* 2016. 8:611-617 |
| **L. E. May, R. R. Suminski, A. Berry, M. D. Langaker and K. M. Gustafson.** Maternal physical activity mode and fetal heart outcome. *Early Hum.Dev.* 2014. 90:365-369 |
| **L. E. May, S. A. Scholtz, R. Suminski and K. M. Gustafson.** Aerobic exercise during pregnancy influences infant heart rate variability at one month of age. *Early Hum.Dev.* 2014. 90:33-38 |
| **L. E. McCullough, M. A. Mendez, E. E. Miller, A. P. Murtha, S. K. Murphy and C. Hoyo.** PMC4622928 Available on 04/30/16]; Associations between prenatal physical activity, birth weight, and DNA methylation at genomically imprinted domains in a multiethnic newborn cohort. *Epigenetics: Official Journal of the DNA Methylation Society.* 2015. 10:597-606 |
| **L. Fairley, G. Santorelli, D. A. Lawlor, et al.** PMC4510905; The relationship between early life modifiable risk factors for childhood obesity, ethnicity and body mass index at age 3 years: findings from the Born in Bradford birth cohort study. *BMC Obesity.* 2015. 2:9 |
| **L. Fenster, A. E. Hubbard, G. C. Windham, K. O. Waller and S. H. Swan.** A prospective study of work-related physical exertion and spontaneous abortion. *Epidemiology.* 1997. 8:66-74 |
| **L. Goni, M. Cuervo, S. Santiago, I. Zazpe and J. A. Martinez.** Parity implications for anthropometrical variables, lifestyle behaviors and dietary habits in pregnant women. *Anales del Sistema Sanitario de Navarra.* 2014. 37:349-362 |
| **L. H. Colbert, B. I. Graubard, K. B. Michels, W. C. Willett and M. R. Forman.** Physical activity during pregnancy and age at menarche of the daughter. *Cancer Epidemiology Biomarkers & Prevention.* 2008. 17:2656-2662 |
| **L. Haakstad and K. Bo.** Effect of supervised aerobic dance exercise in prevention of excessive weight gain in pregnancy: A single blind randomized controlled trial. *International Journal of Gynecology and Obstetrics.* 2009. 107:S198 |
| **L. Hayes, C. McParlin, T. I. Kinnunen, et al.** Change in level of physical activity during pregnancy in obese women: findings from the UPBEAT pilot trial. 2015. 15:52 |
| **L. Hayes, C. McParlin, T. I. Kinnunen, et al.** PMC4352291; Change in level of physical activity during pregnancy in obese women: findings from the UPBEAT pilot trial. *BMC Pregnancy & Childbirth.* 2015. 15:52 |
| **L. Hayes, R. Bell, S. C. Robson and L. Poston.** Physical activity in the uk pregnancy better eating and physical activity trial (UPBEAT). *Diabetic Med.* 2016. 33:6-7 |
| **L. J. Lee, E. Symanski, P. J. Lupo, et al.** HHSPA786527 Available on 02/01/17] PMC4888062 Available on 02/01/17]; Data linkage between the National Birth Defects Prevention Study and the Occupational Information Network (O NET) to assess workplace physical activity, sedentary behaviors, and emotional stressors during pregnancy. *Am.J.Ind.Med.* 2016. 59:137-149 |
| **L. J. Mayberry, M. Smith and P. Gill.** Effect of exercise on uterine activity in the patient in preterm labor. 1992. 12:354-358 |
| **L. Jovanovic, A. Kessler and C. M. Peterson.** Human maternal and fetal response to graded exercise. *J.Appl.Physiol.* 1985. 58:1719-1722 |
| **L. Jovanovic-Peterson, E. P. Durak and C. M. Peterson.** Randomized trial of diet versus diet plus cardiovascular conditioning on glucose levels in gestational diabetes. *American Journal of Obstetrics & Gynecology.* 1989. 161:415-419 |
| **L. K. Andersen, M. Backhausen, H. K. Hegaard and M. Juhl.** Physical exercise and pelvic girdle pain in pregnancy: A nested case-control study within the Danish National Birth Cohort. 2015. 6:198-203 |
| **L. K. Badr, B. Abdallah and A. Mahmoud.** Precursors of preterm birth: comparison of three ethnic groups in the middle East and the United States. 2005. 34:444-452 |
| **L. K. Callaway, P. B. Colditz, N. M. Byrne, et al.** PMC2890340; Prevention of gestational diabetes: feasibility issues for an exercise intervention in obese pregnant women. *Diabetes Care.* 2010. 33:1457-1459 |
| **L. K. Micklesfield, N. S. Levitt, M. T. Carstens, M. A. Dhansay, S. A. Norris and E. V. Lambert.** Early life and current determinants of bone in South African children of mixed ancestral origin. 2007. 34:647-655 |
| **L. Kovaleva.** Assessment of risk factors of urinary incontinence in pregnancy, effect of pelvic floor muscle training. *Int.Urogynecol.J.Pelvic Floor Dysfunct.* 2011. 22:S1473 |
| **L. Larsson and P. G. Lindqvist.** Low-impact exercise during pregnancy--a study of safety. *Acta Obstet.Gynecol.Scand.* 2005. 84:34-38 |
| **L. M. Currie, C. G. Woolcott, D. B. Fell, B. A. Armson and L. Dodds.** The association between physical activity and maternal and neonatal outcomes: a prospective cohort. *Maternal & Child Health Journal.* 2014. 18:1823-1830 |
| **L. M. E. McCowan, C. T. Roberts, G. A. Dekker, et al.** Risk factors for small-for-gestational-age infants by customised birthweight centiles: Data from an international prospective cohort study. 2010. 117:1599-1607 |
| **L. M. Mudd, J. Pivarnik, C. B. Holzman, N. Paneth, K. Pfeiffer and H. Chung.** NIHMS574330 PMC4051283; Leisure-time physical activity in pregnancy and the birth weight distribution: where is the effect?. *Journal of Physical Activity & Health.* 2012. 9:1168-1177 |
| **L. M. Sorbye, K. Klungsoyr, O. Samdal, K. M. Owe and N. H. Morken.** NIHMS649381 Available on 09/01/16] PMC4523494 Available on 09/01/16]; Pre-pregnant body mass index and recreational physical activity: effects on perinatal mortality in a prospective pregnancy cohort. *BJOG: An International Journal of Obstetrics & Gynaecology.* 2015. 122:1322-1330 |
| **L. M. Szymanski and A. J. Satin.** NIHMS351567 PMC3297473; Exercise during pregnancy: fetal responses to current public health guidelines. *Obstetrics & Gynecology.* 2012. 119:603-610 |
| **L. M. Szymanski and A. J. Satin.** NIHMS395779 PMC3464969; Strenuous exercise during pregnancy: is there a limit?. *American Journal of Obstetrics & Gynecology.* 2012. 207:179.e1-179.e6 |
| **L. Mason, B. Roe, H. Wong, J. Davies and J. Bamber.** The role of antenatal pelvic floor muscle exercises in prevention of postpartum stress incontinence: a randomised controlled trial. 2010. 19:2777-2786 |
| **L. Mason, S. Glenn, I. Walton and C. Hughes.** Do women practise pelvic floor exercises during pregnancy or following delivery?. 2001. 87:662-670 |
| **L. Mason, S. Glenn, I. Walton and C. Hughes.** The relationship between between ante-natal pelvic floor muscle exercises and post-partum stress incontinence. 2001. 87:651-670 14 |
| **L. Mason.** Stress incontinence in childbearing women. 2001. 7:72-75 4 |
| **L. Nilsson-Wikmar, K. Holm, R. Oijerstedt and K. Harms-Ringdahl.** Effect of three different physical therapy treatments on pain and activity in pregnant women with pelvic girdle pain: A randomized clinical trial with 3, 6, and 12 months follow-up postpartum. *Spine.* 2005. 30:850-856 |
| **L. Orawan and W. Preecha.** Effect of pelvic floor muscle training (PFMT) during pregnancy on bladder neck descend and delivery. *Journal of the Medical Association of Thailand.* 2014. 97:S156-S163 |
| **L. Pijpers, J. W. Wladimiroff and J. McGhie.** Effect of short-term maternal exercise on maternal and fetal cardiovascular dynamics. *British Journal of Obstetrics & Gynaecology.* 1984. 91:1081-1086 |
| **L. Poston, R. Bell, H. Croker, et al.** Effect of a behavioural intervention in obese pregnant women (the UPBEAT study): A multicentre, randomised controlled trial. *The Lancet Diabetes and Endocrinology.* 2015. 3:767-777 |
| **L. R. D. Varella, V. B. Torres, P. H. M. Angelo, et al.** Influence of parity, type of delivery, and physical activity level on pelvic floor muscles in postmenopausal women. *Journal of Physical Therapy Science.* 2016. 28:824-830 |
| **L. R. Sagedal, B. Sanda, N. C. Overby, et al.** The effect of prenatal lifestyle intervention on weight retention 12 months postpartum: results of the Norwegian Fit for Delivery randomised controlled trial. *BJOG: An International Journal of Obstetrics & Gynaecology.* 2016. 20:20 |
| **L. R. Sagedal, N. C. Overby, E. Bere, et al.** Lifestyle intervention to limit gestational weight gain: the Norwegian Fit for Delivery randomised controlled trial. *BJOG: An International Journal of Obstetrics & Gynaecology.* 2016. 14:14 |
| **L. R. Sagedal, N. C. Overby, H. Lohne-Seiler, et al.** PMC3577450; Study protocol: fit for delivery - can a lifestyle intervention in pregnancy result in measurable health benefits for mothers and newborns? A randomized controlled trial. *BMC Public Health.* 2013. 13:132 |
| **L. R. Varella, V. B. Torres, P. H. Angelo, et al.** PMC4842447; Influence of parity, type of delivery, and physical activity level on pelvic floor muscles in postmenopausal women. *Journal of Physical Therapy Science.* 2016. 28:824-830 |
| **L. Rodr**. Treatment compliance in pregnant women with gestational diabetes after an education program: relationship with anxiety and sociodemographic variables. 2004. 14:318-327 10 |
| **L. S. Adair, C. W. Kuzawa and J. Borja.** Maternal energy stores and diet composition during pregnancy program adolescent blood pressure. *Circulation.* 2001. 104:1034-1039 |
| **L. Schack-Nielsen, C. Molgaard, D. Larsen, C. Martyn and K. F. Michaelsen.** Arterial stiffness in 10-year-old children: Current and early determinants. 2005. 94:1004-1011 |
| **L. Sibley, R. O. Ruhling, J. Cameron-Foster, C. Christensen and T. Bolen.** Swimming and physical fitness during pregnancy. *J.Nurse.* 1981. 26:3-12 |
| **L. Spatling, F. Fallenstein, A. Huch, R. Huch and G. Rooth.** The variability of cardiopulmonary adaptation to pregnancy at rest and during exercise. 1992. 99 Suppl 8:1-40 |
| **L. Z. Jaime, B. M. Manuela, O. C. Catalina, J. M. I. Mar**. Physical activity level according to GPAQ in pregnant and postpartum women attended in a family health center. *Rev.Chil.Obstet.Ginecol.* 2013. 78:425-431 |
| **L. Zhu, L. Li, J. H. Lang and T. Xu.** Prevalence and risk factors for peri- and postpartum urinary incontinence in primiparous women in China: a prospective longitudinal study. 2012. 23:563-572 |
| **Lanay M. Mudd, Jim M. Pivarnik, Karin A. Pfeiffer, Nigel Paneth, Hwan Chung and Claudia Holzman.** Maternal physical activity during pregnancy, child leisure-time activity, and child weight status at 3 to 9 years. *Journal of Physical Activity & Health.* 2015. 12:506-514 |
| **Lene A. H. Haakstad and Kari Bo.** Effect of a regular exercise programme on pelvic girdle and low back pain in previously inactive pregnant women: a randomized controlled trial. *Journal of Rehabilitation Medicine (Stiftelsen Rehabiliteringsinformation).* 2015. 47:229-234 6p |
| **Lou Atkinson, Ellinor K. Olander and David P. French.** Acceptability of a weight management intervention for pregnant and postpartum women with BMI >30 kg/m2: A qualitative evaluation of an individualized, home-based service. *Matern.Child Health J.* 2016. 20:88-96 |
| **Lucy C. Chappell, Paul T. Seed, Jenny Myers, et al.** Exploration and confirmation of factors associated with uncomplicated pregnancy in nulliparous women: prospective cohort study. 2015. 49:136-136 |
| **M. A. Carvalhaes, A. C. Martiniano, M. B. Malta, M. Y. Takito and M. H. Benicio.** [Physical activity in pregnant women receiving care in primary health care units]. 2013. 47:958-967 |
| **M. A. Klebanoff, P. H. Shiono and J. C. Carey.** The effect of physical activity during pregnancy on preterm delivery and birth weight. *American Journal of Obstetrics & Gynecology.* 1990. 163:1450-1456 |
| **M. A. Kominiarek.** A survey of health behaviors in minority women in pregnancy: the influence of body mass index. 2014. 24:e291-5 |
| **M. A. Manders, G. J. Sonder, E. J. Mulder and G. H. Visser.** The effects of maternal exercise on fetal heart rate and movement patterns. *Early Hum.Dev.* 1997. 48:237-247 |
| **M. A. Q. Mutsaerts, H. Groen, Der Meer Buiter-Van, et al.** Effects of paternal and maternal lifestyle factors on pregnancy complications and perinatal outcome. A Dutch population-based birth-cohort study: The GECKO Drenthe study. *Human Reproduction.* 2012. 27: |
| **M. A. Sady, B. B. Haydon, S. P. Sady, M. W. Carpenter, P. D. Thompson and D. R. Coustan.** Cardiovascular-response to maximal cycle exercise during pregnancy and at 2 and 7 months post partum. *Obstet.Gynecol.* 1990. 162:1181-1185 |
| **M. A. Szmeja, C. Cramp, R. M. Grivell, A. R. Deussen, L. N. Yelland and J. M. Dodd.** Use of a DVD to provide dietary and lifestyle information to pregnant women who are overweight or obese: a nested randomised trial. *BMC pregnancy and childbirth.* 2014. 14:12 |
| **M. Aittasalo, J. Raitanen, T. I. Kinnunen, K. Ojala, P. Kolu and R. Luoto.** Is intensive counseling in maternity care feasible and effective in promoting physical activity among women at risk for gestational diabetes? Secondary analysis of a cluster randomized NELLI study in Finland. *International Journal of Behavioral Nutrition and Physical Activity.* 2012. 9 (no pagination): |
| **M. Aittasalo, M. Pasanen, M. Fogelholm, T. I. Kinnunen, K. Ojala and R. Luoto.** Physical activity counseling in maternity and child health care - a controlled trial. 2008. 8:14 |
| **M. B. van Doorn, F. K. Lotgering, P. C. Struijk, J. Pool and H. C. Wallenburg.** Maternal and fetal cardiovascular responses to strenuous bicycle exercise. *American Journal of Obstetrics & Gynecology.* 1992. 166:854-859 |
| **M. Bisson, C. Rheaume, E. Bujold, A. Tremblay and I. Marc.** Modulation of blood pressure response to exercise by physical activity and relationship with resting blood pressure during pregnancy. 2014. 32:1450-7; discussion 1457 |
| **M. Bisson, N. Almeras, J. Plaisance, et al.** Maternal fitness at the onset of the second trimester of pregnancy: correlates and relationship with infant birth weight. *Pediatric Obesity.* 2013. 8:464-474 |
| **M. Bisson, N. Almeras, S. S. Dufresne, et al.** A 12-Week Exercise Program for Pregnant Women with Obesity to Improve Physical Activity Levels: An Open Randomised Preliminary Study. *Plos One.* 2015. 10: |
| **M. Bonzini, D. Coggon, K. Godfrey, H. Inskip, S. Crozier and K. T. Palmer.** PMC3088899 UKMS35217; Occupational physical activities, working hours and outcome of pregnancy: findings from the Southampton Women's Survey. *Occupational & Environmental Medicine.* 2009. 66:685-690 |
| **M. C. de Barros, M. A. Lopes, R. P. Francisco, A. D. Sapienza and M. Zugaib.** Resistance exercise and glycemic control in women with gestational diabetes mellitus. *American Journal of Obstetrics & Gynecology.* 2010. 203:556.e1-556.e6 |
| **M. C. Hatch, X. O. Shu, D. E. McLean, et al.** Maternal exercise during pregnancy, physical fitness, and fetal growth. *Am.J.Epidemiol.* 1993. 137:1105-1114 |
| **M. Connelly, H. Brown, P. van der Pligt and M. Teychenne.** Modifiable barriers to leisure-time physical activity during pregnancy: a qualitative study investigating first time mother's views and experiences. 2015. 15:100 |
| **M. D. Avery and A. J. Walker.** Acute effect of exercise on blood glucose and insulin levels in women with gestational diabetes. 2001. 10:52-58 |
| **M. D. Avery, A. S. Leon and R. A. Kopher.** Effects of a partially home-based exercise program for women with gestational diabetes. 1997. 89:10-15 |
| **M. D. Hennessy, S. L. Volpe, M. D. Sammel and S. Gennaro.** Skipping meals and less walking among African Americans diagnosed with preterm labor. *Journal of Nursing Scholarship.* 2010. 42:147-155 |
| **M. D. Schmidt, P. Pekow, P. S. Freedson, G. Markenson and L. Chasan-Taber.** Physical activity patterns during pregnancy in a diverse population of women. *Journal of Women's Health.* 2006. 15:909-918 |
| **M. Dekker Nitert, H. L. Barrett, K. J. Denny, H. D. McIntyre and L. K. Callaway.** Exercise in pregnancy does not alter gestational weight gain, MCP-1 or leptin in obese women. *Australian and New Zealand Journal of Obstetrics and Gynaecology.* 2015. 55:27-33 |
| **M. Dello Russo, W. Ahrens, T. De Vriendt, et al.** Gestational weight gain and adiposity, fat distribution, metabolic profile, and blood pressure in offspring: the IDEFICS project. *Int.J.Obes.* 2013. 37:914-919 |
| **M. Dimov, J. Khoury and R. Tsang.** Bone mineral loss during pregnancy: is tennis protective?. *Journal of Physical Activity & Health.* 2010. 7:239-245 |
| **M. Doustan, M. Seifourian, M. Zarghami and T. Azmsha.** Relationship between physical activity of mothers before and during pregnancy with the newborn health and pregnancy outcome. *Journal of Physical Education and Sport.* 2012. 12:222-229 |
| **M. E. Bolton.** Scuba diving and fetal well-being: a survey of 208 women. 1980. 7:183-189 |
| **M. E. O'Neill, K. A. Cooper, C. M. Cook, B. J. Trudinger, E. S. Boyce and S. N. Hunyor.** The influence of exercise intensity on the umbilical artery flow velocity waveform and foetal heart rate response to moderate duration, semi-supine cycling in late pregnancy. *Aust.J.Sci.Med.Sport.* 1991. 23:101-104 |
| **M. E. O'Neill, K. A. Cooper, C. M. Mills, E. S. Boyce and S. N. Hunyor.** Accuracy of Borg's ratings of perceived exertion in the prediction of heart rates during pregnancy. 1992. 26:121-124 |
| **M. E. O'Neill, K. A. Cooper, E. S. Boyce and S. N. Hunyor.** Postural effects when cycling in late pregnancy. *Women & Birth: Journal of the Australian College of Midwives.* 2006. 19:107-111 |
| **M. E. O'Neill, K. A. Cooper, S. N. Hunyor and S. Boyce.** Cardiorespiratory response to walking in trained and sedentary pregnant women. *J.Sports Med.Phys.Fitness.* 1993. 33:40-43 |
| **M. E. O'Neill.** PMC1332262; Maternal rectal temperature and fetal heart rate responses to upright cycling in late pregnancy. *Br.J.Sports Med.* 1996. 30:32-35 |
| **M. F. Hjorth, S. Kloster, T. Girma, et al.** Level and intensity of objectively assessed physical activity among pregnant women from urban Ethiopia. 2012. 12:154 |
| **M. F. Hjorth, S. Kloster, T. Girma, et al.** PMC3543321; Level and intensity of objectively assessed physical activity among pregnant women from urban Ethiopia. *BMC Pregnancy & Childbirth.* 2012. 12:154 |
| **M. F. Mottola, I. Giroux, R. Gratton, et al.** Nutrition and exercise prevent excess weight gain in overweight pregnant women. 2010. 42:265-272 |
| **M. F. Mottola, M. H. Davenport, C. R. Brun, S. D. Inglis, S. Charlesworth and M. M. Sopper.** VO2peak prediction and exercise prescription for pregnant women. 2006. 38:1389-1395 |
| **M. F. Mottola, S. Inglis, C. R. Brun and J. A. Hammond.** Physiological and metabolic responses of late pregnant women to 40 min of steady-state exercise followed by an oral glucose tolerance perturbation. *J.Appl.Physiol.* 2013. 115:597-604 |
| **M. F. Sowers, T. Scholl, L. Harris and M. Jannausch.** Bone loss in adolescent and adult pregnant women. 2000. 96:189-193 |
| **M. G. Backhausen, M. Katballe, H. Hansson, A. Tabor, P. Damm and H. K. Hegaard.** A standardised individual unsupervised water exercise intervention for healthy pregnant women. A qualitative feasibility study. 2014. 5:176-181 |
| **M. Gharaibeh, R. Al-Ma'aitah and N. Al Jada.** Lifestyle practices of Jordanian pregnant women. 2005. 52:92-100 |
| **M. Gojnic, M. Perovic, M. Pervulov and A. Ljubic.** The effects of adjuvant insulin therapy among pregnant women with IGT who failed to achieve the desired glycemia levels by diet and moderate physical activity. *Journal of Maternal-Fetal and Neonatal Medicine.* 2012. 25:2028-2034 |
| **M. Goodarzi Khoigani, Z. Paknahad and F. Mardanian.** The relationship between nutrients intake and preeclampsia in pregnant women. 2012. 17:S210-S217 |
| **M. H. Black, D. A. Sacks, A. H. Xiang and J. M. Lawrence.** PMC3526206; The relative contribution of prepregnancy overweight and obesity, gestational weight gain, and IADPSG-defined gestational diabetes mellitus to fetal overgrowth. *Diabetes Care.* 2013. 36:56-62 |
| **M. H. Davenport, C. D. Steinback and M. F. Mottola.** Impact of pregnancy and obesity on cardiorespiratory responses during weight-bearing exercise. 2009. 167:341-347 |
| **M. H. Davenport, M. F. Mottola, R. McManus and R. Gratton.** A walking intervention improves capillary glucose control in women with gestational diabetes mellitus: a pilot study. 2008. 33:511-517 |
| **M. H. Davenport, S. Charlesworth, D. Vanderspank, M. M. Sopper and M. F. Mottola.** Development and validation of exercise target heart rate zones for overweight and obese pregnant women. 2008. 33:984-989 |
| **M. H. Eggen, B. Stuge, P. Mowinckel, K. S. Jensen and K. B. Hagen.** Can supervised group exercises including ergonomic advice reduce the prevalence and severity of low back pain and pelvic girdle pain in pregnancy? A randomized controlled trial. 2012. 92:781-790 |
| **M. Hatch, B. Levin, X. O. Shu and M. Susser.** PMC1508461; Maternal leisure-time exercise and timely delivery. *Am.J.Public Health.* 1998. 88:1528-1533 |
| **M. Hatch, B. T. Ji, X. O. Shu and M. Susser.** Do standing, lifting, climbing, or long hours of work during pregnancy have an effect on fetal growth?. *Epidemiology.* 1997. 8:530-536 |
| **M. Hawkins, B. Braun, B. H. Marcus, E. Stanek 3, G. Markenson and L. Chasan-Taber.** PMC4479080; The impact of an exercise intervention on C - reactive protein during pregnancy: a randomized controlled trial. *BMC Pregnancy & Childbirth.* 2015. 15:139 |
| **M. Hawkins, B. Braun, B. H. Marcus, E. Stanek 3rd, G. Markenson and L. Chasan-Taber.** The impact of an exercise intervention on C - reactive protein during pregnancy: a randomized controlled trial. 2015. 15:139 |
| **M. Hawkins, L. Chasan-Taber, B. Marcus, et al.** Impact of an exercise intervention on physical activity during pregnancy: the behaviors affecting baby and you study. 2014. 104:e74-81 |
| **M. Hawkins, L. Chasan-Taber, B. Marcus, et al.** PMC4167076 Available on 10/01/15]; Impact of an exercise intervention on physical activity during pregnancy: the behaviors affecting baby and you study. *Am.J.Public Health.* 2014. 104:e74-81 |
| **M. Hawkins, M. Hosker, B. H. Marcus, et al.** A pregnancy lifestyle intervention to prevent gestational diabetes risk factors in overweight Hispanic women: a feasibility randomized controlled trial. 2015. 32:108-115 |
| **M. Hawkins, P. Pekow and L. Chasan-Taber.** Physical activity, sedentary behavior, and C-reactive protein in pregnancy. 2014. 46:284-292 |
| **M. Hayman, C. Short and P. Reaburn.** An investigation into the exercise behaviours of regionally based Australian pregnant women. 2015. |
| **M. I. Both, M. A. Overvest, M. F. Wildhagen, J. Golding and H. I. Wildschut.** PMC2896625; The association of daily physical activity and birth outcome: a population-based cohort study. *Eur.J.Epidemiol.* 2010. 25:421-429 |
| **M. I. Both, M. A. Overvest, M. F. Wildhagen, J. Golding and H. I. Wildschut.** The association of daily physical activity and birth outcome: a population-based cohort study. 2010. 25:421-429 |
| **M. J. Berry, R. G. McMurray and V. L. Katz.** Pulmonary and ventilatory responses to pregnancy, immersion, and exercise. 1989. 66:857-862 |
| **M. J. Edwards, J. Metcalfe, M. J. Dunham and M. S. Paul.** Accelerated respiratory response to moderate exercise in late pregnancy. *Respir.Physiol.* 1981. 45:229-241 |
| **M. J. Mantle, R. M. Greenwood and H. L. F. Currey.** Backache in pregnancy. 1977. 16:95-101 |
| **M. J. Morton, M. S. Paul, G. R. Campos, M. V. Hart and J. Metcalfe.** Exercise dynamics in late gestation: effects of physical training. *American Journal of Obstetrics & Gynecology.* 1985. 152:91-97 |
| **M. J. Nieuwenhuijsen, K. Northstone, J. Golding and Alspac Study Team.** Swimming and birth weight. *Epidemiology.* 2002. 13:725-728 |
| **M. J. Ong, K. E. Wallman, P. A. Fournier, J. P. Newnham and K. J. Guelfi.** PMC4946108; Enhancing energy expenditure and enjoyment of exercise during pregnancy through the addition of brief higher intensity intervals to traditional continuous moderate intensity cycling. *BMC Pregnancy & Childbirth.* 2016. 16:161 |
| **M. J. Ong, K. J. Guelfi, T. Hunter, K. E. Wallman, P. A. Fournier and J. P. Newnham.** Supervised home-based exercise may attenuate the decline of glucose tolerance in obese pregnant women. 2009. 35:418-421 |
| **M. J. Saurel-Cubizolles, D. Subtil and M. Kaminski.** Is preterm delivery still related to physical working conditions in pregnancy?. 1991. 45:29-34 |
| **M. J. Saurel-Cubizolles, M. Kaminski, C. Du Mazaubrun and G. Breart.** Working conditions and arterial hypertension during pregnancy. [French]. 1991. 39:37-43 |
| **M. J. Saurel-Cubizolles, M. Kaminski, C. Du Mazaubrun, J. Llado and M. Estryn-Behar.** High blood pressure during pregnancy and working conditions among hospital personnel. 1991. 40:29-34 |
| **M. Jedrzejko, K. Nowosielski, R. Poreba, I. Ulman-Wlodarz and R. Bobinski.** Physical efficiency and activity energy expenditure in term pregnancy females measured during cardiopulmonary exercise tests with a supine cycle ergometer. *Journal of Maternal-Fetal & Neonatal Medicine.* 2016. 1-22 |
| **M. Jozwik and M. Jozwik.** The physiological basis of pelvic floor exercises in the treatment of stress urinary incontinence. *Br.J.Obstet.Gynaecol.* 1998. 105:1046-1051 |
| **M. Juhl, J. Olsen, P. K. Andersen, E. A. Nohr and A. M. Andersen.** Physical exercise during pregnancy and fetal growth measures: a study within the Danish National Birth Cohort. *American Journal of Obstetrics & Gynecology.* 2010. 202:63.e1-63.e8 |
| **M. Juhl, K. Strandberg-Larsen, P. S. Larsen, et al.** Occupational lifting during pregnancy and risk of fetal death in a large national cohort study. *Scandinavian Journal of Work, Environment and Health.* 2013. 39:335-342 |
| **M. Juhl, M. Kogevinas, P. K. Andersen, A. M. Andersen and J. Olsen.** Is swimming during pregnancy a safe exercise?. *Epidemiology.* 2010. 21:253-258 |
| **M. Juhl, M. Madsen, A. M. N. Andersen, P. K. Andersen and J. Olsen.** Distribution and predictors of exercise habits among pregnant women in the Danish National Birth Cohort. 2012. 22:128-138 |
| **M. Juhl, P. K. Andersen, J. Olsen and A. M. Andersen.** Psychosocial and physical work environment, and risk of pelvic pain in pregnancy. A study within the Danish national birth cohort. 2005. 59:580-585 |
| **M. Juhl, P. K. Andersen, J. Olsen, et al.** Physical exercise during pregnancy and the risk of preterm birth: a study within the Danish National Birth Cohort. *Am.J.Epidemiol.* 2008. 167:859-866 |
| **M. Juhl, P. S. Larsen, P. K. Andersen, et al.** Occupational lifting during pregnancy and child's birth size in a large cohort study. *Scandinavian Journal of Work, Environment and Health.* 2014. 40:411-419 |
| **M. K. Campbell and M. F. Mottola.** Recreational exercise and occupational activity during pregnancy and birth weight: a case-control study. *American Journal of Obstetrics & Gynecology.* 2001. 184:403-408 |
| **M. K. Horan, C. A. McGowan, E. R. Gibney, J. Byrne, J. M. Donnelly and F. M. McAuliffe.** Maternal nutrition and glycaemic index during pregnancy impacts on offspring adiposity at 6 months of age-analysis from the ROLO randomised controlled trial. *Nutrients.* 2016. 8: |
| **M. K. Horan, C. A. McGowan, E. R. Gibney, J. M. Donnelly and F. M. McAuliffe.** Maternal diet and weight at 3 months postpartum following a pregnancy intervention with a low glycaemic index diet: results from the ROLO randomised control trial. 2014. 6:2946-2955 |
| **M. K. Horan, C. A. McGowan, J. Donnelly, E. Gibney and F. M. McAuliffe.** Maternal diet and weight at 3 months partum following a pregnancy intervention with a low glycaemic index diet: Results from the ROLO randomised control trial. *Archives of Disease in Childhood: Fetal and Neonatal Edition.* 2014. 99: |
| **M. K. Horan, C. A. McGowan, O. Doyle and F. M. McAuliffe.** Well-being in pregnancy: an examination of the effect of socioeconomic, dietary and lifestyle factors including impact of a low glycaemic index dietary intervention. *Eur.J.Clin.Nutr.* 2014. 68:19-24 |
| **M. Kamali, E. Jafari and S. Mazloom Zadeh.** The effect of 'sitting pelvic tilt exercise' on low back pain and sleep disorder in primigravidas during the third trimester. *Qom University of Medical Sciences Journal.* 2009. 3:7-7 1p |
| **M. Kashanian, Z. Akbari and M. H. Alizadeh.** The effect of exercise on back pain and lordosis in pregnant women. *International Journal of Gynecology and Obstetrics.* 2009. 107:160-161 |
| **M. Kashanian, Z. Akbari and M. H. Alizadeh.** The effect of exercise on back pain and lordosis in pregnant women. 2009. 107:160-161 |
| **M. Kihlstrand, B. Stenman, S. Nilsson and O. Axelsson.** Water-gymnastics reduced the intensity of back/low back pain in pregnant women. 1999. 78:180-185 |
| **M. Koushkie Jahromi, B. Namavar Jahromi and S. Hojjati.** PMC3407581; Relationship between Daily Physical Activity During Last Month of Pregnancy and Pregnancy Outcome. *Iranian Red Crescent Medical Journal.* 2011. 13:15-20 |
| **M. Kucuk and F. Doymaz.** Placental weight and placental weight-to-birth weight ratio are increased in diet- and exercise-treated gestational diabetes mellitus subjects but not in subjects with one abnormal value on 100-g oral glucose tolerance test. *Journal of Diabetes & its Complications.* 2009. 23:25-31 |
| **M. Kusaka, M. Matsuzaki, M. Shiraishi and M. Haruna.** Immediate stress reduction effects of yoga during pregnancy: One group pre-post test. *Women & Birth: Journal of the Australian College of Midwives.* 2016. 16:16 |
| **M. L. Bovbjerg and A. Siega-Riz.** NIHMS384329 PMC3478876; Exercise during pregnancy and cesarean delivery: North Carolina PRAMS, 2004-2005. *Birth.* 2009. 36:200-207 |
| **M. L. Bovbjerg, A. M. Siega-Riz, K. R. Evenson and W. Goodnight.** Exposure analysis methods impact associations between maternal physical activity and cesarean delivery. 2015. 12:37-47 |
| **M. L. Gau, C. Y. Chang, S. H. Tian and K. C. Lin.** Effects of birth ball exercise on pain and self-efficacy during childbirth: a randomised controlled trial in Taiwan. 2011. 27:e293-300 |
| **M. L. Middlekauff, M. J. Egger, I. Nygaard and J. M. Shaw.** The impact of acute and chronic strenuous exercise on pelvic floor muscle strength and support in nulliparous healthy women. *Female Pelvic Medicine and Reconstructive Surgery.* 2015. 1):S15 |
| **M. L. Osterdal, M. Strom, A. K. Klemmensen, et al.** Does leisure time physical activity in early pregnancy protect against pre-eclampsia? Prospective cohort in Danish women. 2009. 116:98-107 |
| **M. L. Pernoll, J. Metcalfe, P. A. Kovach, R. Wachtel and M. J. Dunham.** Ventilation during rest and exercise in pregnancy and postpartum. 1975. 25:295-310 |
| **M. L. Pernoll, J. Metcalfe, T. L. Schlenker, J. E. Welch and J. A. Matsumoto.** Oxygen consumption at rest and during exercise in pregnancy. 1975. 25:285-293 |
| **M. L. Ree, I. Nygaard and K. Bø.** Muscular fatigue in the pelvic floor muscles after strenuous physical activity. *Acta Obstet.Gynecol.Scand.* 2007. 86:870-876 |
| **M. L. Ruebel, K. Shankar, T. Badger and A. Andres.** Differences in resting metabolic rate and physical activity patterns in lean and overweight/obese pregnant women. *FASEB Journal.* 2012. 26: |
| **M. Latka, J. Kline and M. Hatch.** Exercise and spontaneous abortion of known karyotype. *Epidemiology.* 1999. 10:73-75 |
| **M. Lawrence and R. G. Whitehead.** Physical activity and total energy expenditure of child-bearing Gambian village women. *Eur.J.Clin.Nutr.* 1988. 42:145-160 |
| **M. Leppanen, M. Aittasalo, J. Raitanen, T. I. Kinnunen, U. M. Kujala and R. Luoto.** Physical activity during pregnancy: predictors of change, perceived support and barriers among women at increased risk of gestational diabetes. 2014. 18:2158-2166 |
| **M. Lima, S. Ismail, A. Ashworth and S. S. Morris.** Influence of heavy agricultural work during pregnancy on birthweight in Northeast Brazil. *Int.J.Epidemiol.* 1999. 28:469-474 |
| **M. Lindqvist, M. Lindkvist, E. Eurenius, M. Persson, A. Ivarsson and I. Mogren.** Leisure time physical activity among pregnant women and its associations with maternal characteristics and pregnancy outcomes. *Sexual and Reproductive Healthcare.* 2016. 9:14-20 |
| **M. Lof and E. Forsum.** Activity pattern and energy expenditure due to physical activity before and during pregnancey in healthy Swedish women. *Br.J.Nutr.* 2006. 95:296-302 |
| **M. Lof, L. Hilakivi-Clarke, S. Sandin and E. Weiderpass.** Effects of pre-pregnancy physical activity and maternal BMI on gestational weight gain and birth weight. *Acta Obstet.Gynecol.Scand.* 2008. 87:524-530 |
| **M. Lof.** Physical activity pattern and activity energy expenditure in healthy pregnant and non-pregnant Swedish women. 2011. 65:1295-1301 |
| **M. Luaces Mendez, R. Barakat, R. Montejo-Rodriguez and M. Perales-Santaella.** Effects of physical exercise on cardiovascular status and ventricular mechanics during pregnancy: A casecontrol study. *Eur.Heart J.* 2011. 32:1026 |
| **M. M. Demment, M. L. Graham and C. M. Olson.** How an online intervention to prevent excessive gestational weight gain is used and by whom: a randomized controlled process evaluation. 2014. 16:e194 |
| **M. M. Kennelly, M. Geary, N. McCaffrey, P. McLoughlin, A. Staines and P. McKenna.** Exercise-related changes in umbilical and uterine artery waveforms as assessed by Doppler ultrasound scans. *American Journal of Obstetrics & Gynecology.* 2002. 187:661-666 |
| **M. M. Kennelly, N. McCaffrey, P. McLoughlin, S. Lyons and P. McKenna.** Fetal heart rate response to strenuous maternal exercise: not a predictor of fetal distress. *American Journal of Obstetrics & Gynecology.* 2002. 187:811-816 |
| **M. M. Lawani, E. Alihonou, B. Akplogan, G. Poumarat, L. Okou and N. Adjadi.** Effect of antenatal gymnastics on childbirth: a study on 50 sedentary women in the Republic of Benin during the second and third quarters of pregnancy]. *Sante.* 2003. 13:235-241 |
| **M. M. Okido, F. L. Valeri, W. P. Martins, C. H. Ferreira, G. Duarte and R. C. Cavalli.** Assessment of foetal wellbeing in pregnant women subjected to pelvic floor muscle training: a controlled randomised study. *International Urogynecology Journal.* 2015. 26:1475-1481 |
| **M. M. Shangold.** Exercise-induced changes in uterine artery blood flow, as measured by Doppler ultrasound, in pregnant subjects. 1988. 5:187-188 |
| **M. M. van Poppel, L. De Wit, J. Jelsma, A. Bogaerts and F. J. Snock.** Physical activity and mental health in obese pregnant women: results from dali study. *Int.J.Behav.Med.* 2014. 21:S146 |
| **M. Madsen, T. Jorgensen, M. L. Jensen, et al.** Leisure time physical exercise during pregnancy and the risk of miscarriage: A study within the Danish National Birth Cohort. *BJOG: An International Journal of Obstetrics and Gynaecology.* 2007. 114:1419-1426 |
| **M. Makara-Studzinskct, K. Kry-Noszczyk, M. Starczynska, A. Sieron and Z. Sliwinski.** Types of physical activity during pregnancy. 2013. 20:19-24 |
| **M. Moffatt and M. Flynn.** Prevention of pregnancy-related lumbopelvic pain, using a single exercise and advice-based physiotherapy intervention in early pregnancy: A pilot study. 2014. 35:41-48 |
| **M. Muzik, S. E. Hamilton, K. Lisa Rosenblum, E. Waxler and Z. Hadi.** Mindfulness yoga during pregnancy for psychiatrically at-risk women: preliminary results from a pilot feasibility study. *Complementary Therapies in Clinical Practice.* 2012. 18:235-240 |
| **M. N. van Poppel, M. Peinhaupt, M. E. Eekhoff, et al.** Physical activity in overweight and obese pregnant women is associated with higher levels of proinflammatory cytokines and with reduced insulin response through interleukin-6. *Diabetes Care.* 2014. 37:1132-1139 |
| **M. N. van Poppel, N. Oostdam, M. E. Eekhoff, M. G. Wouters, W. van Mechelen and P. M. Catalano.** Longitudinal relationship of physical activity with insulin sensitivity in overweight and obese pregnant women. *Journal of Clinical Endocrinology & Metabolism.* 2013. 98:2929-2935 |
| **M. N. van Poppel, N. Oostdam, M. E. Eekhoff, M. G. Wouters, W. van Mechelen and P. M. Catalano.** Longitudinal relationship of physical activity with insulin sensitivity in overweight and obese pregnant women. 2013. 98:2929-2935 |
| **M. Nayak, M. E. Eekhoff, M. Peinhaupt, A. Heinemann, G. Desoye and M. N. van Poppel.** Cytokines and their association with insulin resistance in obese pregnant women with different levels of physical activity. 2016. 77:72-78 |
| **M. Pelaez, S. Gonzalez-Cerron, R. Montejo and R. Barakat.** Pelvic floor muscle training included in a pregnancy exercise program is effective in primary prevention of urinary incontinence: a randomized controlled trial. 2014. 33:67-71 |
| **M. Peoples-Sheps, E. Siegel, C. M. Suchindran, H. Origasa, A. Ware and A. Barakat.** PMC1405728; Characteristics of maternal employment during pregnancy: effects on low birthweight. *Am.J.Public Health.* 1991. 81:1007-1012 |
| **M. Perales, A. Santos-Lozano, F. Sanchis-Gomar, et al.** Maternal Cardiac Adaptations to a Physical Exercise Program during Pregnancy. *Medicine & Science in Sports & Exercise.* 2016. 48:896-906 |
| **M. Perales, I. Calabria, C. Lopez, E. Franco, J. Coteron and R. Barakat.** Regular Exercise Throughout Pregnancy Is Associated With a Shorter First Stage of Labor. *American Journal of Health Promotion.* 2016. 30:149-154 |
| **M. Perales, M. Luaces, M. I. Barriopedro, R. Montejo and R. Barakat.** Effects of a supervised exercise program on cardiac structure during pregnancy. Randomized clinical trial. Spanish]. *Progresos de Obstetricia y Ginecologia.* 2012. 55:209-215 |
| **M. Persson, A. Winkvist and I. Mogren.** PMC4372034; Lifestyle and health status in a sample of Swedish women four years after pregnancy: a comparison of women with a history of normal pregnancy and women with a history of gestational diabetes mellitus. *BMC Pregnancy & Childbirth.* 2015. 15:57 |
| **M. R. Domingues and A. J. Barros.** Leisure-time physical activity during pregnancy in the 2004 Pelotas Birth Cohort Study.[Erratum appears in Rev Saude Publica. 2007 Jun;41(3):493]. 2007. 41:173-180 |
| **M. R. Domingues, A. J. Barros and A. Matijasevich.** Leisure time physical activity during pregnancy and preterm birth in Brazil. *International Journal of Gynaecology & Obstetrics.* 2008. 103:9-15 |
| **M. R. Domingues, A. Matijasevich, A. J. Barros, I. S. Santos, B. L. Horta and P. C. Hallal.** PMC4211660; Physical activity during pregnancy and offspring neurodevelopment and IQ in the first 4 years of life. *PLoS ONE Electronic Resource].* 2014. 9:e110050 |
| **M. R. Jackson, P. Gott, S. J. Lye, J. W. Ritchie and J. F. Clapp 3.** The effects of maternal aerobic exercise on human placental development: placental volumetric composition and surface areas. *Placenta.* 1995. 16:179-191 |
| **M. R. Marshall and J. M. Pivarnik.** Perceived Exertion of Physical Activity During Pregnancy. 2015. 12:1039-1043 |
| **M. Rosediani, N. H. Nik Rosmawati, M. Juliawati and D. Norwati.** Knowledge, attitude and practice towards pelvic floor muscle exercise among pregnant women attending antenatal clinic in Universiti Sains Malaysia Hospital, Malaysia. 2012. 19:37-38 |
| **M. S. Maturi, P. Afshary and P. Abedi.** Effect of physical activity intervention based on a pedometer on physical activity level and anthropometric measures after childbirth: A randomized controlled trial. *BMC Pregnancy and Childbirth.* 2011. 11: |
| **M. S. Poudevigne and P. J. O'Connor.** Physical activity and mood during pregnancy. *Med.Sci.Sports Exerc.* 2005. 37:1374-1380 |
| **M. S. Rogers and B. Tomlinson.** Change in cardiovascular indices with position and isometric exercise throughout pregnancy: Assessment by impedance cardiography and oscillometric sphygmomanometry. *Hypertension in Pregnancy.* 1998. 17:191-202 |
| **M. S. Rogers and C. Hung.** Change in mean arterial pressure following isometric exercise in normotensive and hypertensive pregnancy: Validation of a continuous blood pressure monitor. 1996. 15:211-218 |
| **M. S. Treuth, N. F. Butte and M. Puyau.** Pregnancy-related changes in physical activity, fitness, and strength. *Med.Sci.Sports Exerc.* 2005. 37:832-837 |
| **M. S. Treuth, N. F. Butte and M. Puyau.** Pregnancy-related changes in physical activity, fitness, and strength. 2005. 37:832-837 |
| **M. S. Wingate, S. Swaminathan and G. R. Alexander.** The influence of maternal mobility on birth outcomes of non-hispanic blacks. *Maternal & Child Health Journal.* 2009. 13:48-55 |
| **M. San Juan Dertkigil, J. G. Cecatti, M. A. Sarno, S. R. Cavalcante and E. F. Marussi.** Variation in the amniotic fluid index following moderate physical activity in water during pregnancy. 2007. 86:547-552 |
| **M. Satyapriya, H. R. Nagendra, R. Nagarathna and V. Padmalatha.** Effect of integrated yoga on stress and heart rate variability in pregnant women. *International Journal of Gynecology and Obstetrics.* 2009. 104:218-222 |
| **M. Saurel-Cubizolles, D. Subtil and M. Kaminski.** PMC1060698; Is preterm delivery still related to physical working conditions in pregnancy?. *Journal of Epidemiology & Community Health.* 1991. 45:29-34 |
| **M. Saurel-Cubizolles, M. Kaminski, C. Du Mazaubrun, J. Llado and M. Estryn-Behar.** High blood pressure during pregnancy and working conditions among hospital personnel. *European Journal of Obstetrics, Gynecology, & Reproductive Biology.* 1991. 40:29-34 |
| **M. Shafiee and M. Rostami.** Comparison between the effect of lumbopelvic belt and home based pelvic stabilizing exercise on pregnant women with pelvic girdle pain; A randomized controlled trial. *Eur.J.Med.Res.* 2011. 16:35 |
| **M. Sillero-Quintana, E. Conde-Pascual, P. Gomez-Carmona, I. Fernandez-Cuevas and T. Garcia-Pastor.** Effect of yoga and swimming on body temperature of pregnant women. *Thermology International.* 2012. 22 (3):108 |
| **M. Skreden, N. C. Overby, L. R. Sagedal, et al.** Changes in mode of transportation to work or school from pre-pregnancy to early pregnancy in the Norwegian Fit for Delivery study. *Preventive Medicine Reports.* 2015. 2:429-435 |
| **M. Skreden, N. C. Overby, L. R. Sagedal, et al.** PMC4730776; Change in active transportation and weight gain in pregnancy. *International Journal of Behavioral Nutrition & Physical Activity.* 2016. 13:10 |
| **M. Slater, L. Spector, A. Linabery, C. Blair and J. Ross.** Physical activity during early pregnancy and infant birth size. *Am.J.Epidemiol.* 2012. 175:S24 |
| **M. St Leger Dowse, A. Gunby, R. Moncad, C. Fife and P. Bryson.** Scuba diving and pregnancy: can we determine safe limits?. 2006. 26:509-513 |
| **M. Tanvig, C. A. Vinter, J. S. Jorgensen, et al.** Effects of lifestyle intervention in pregnancy and anthropometrics at birth on offspring metabolic profile at 2.8 years: results from the Lifestyle in Pregnancy and Offspring (LiPO) study. *Journal of Clinical Endocrinology & Metabolism.* 2015. 100:175-183 |
| **M. Teychenne, G. Abbott, der Pligt van, et al.** Associations between physical activity, television viewing and postnatal depressive symptoms amongst healthy primiparous mothers. *Mental Health and Physical Activity.* 2016. 10:62-67 |
| **M. Ussher, P. Aveyard, T. Coleman, et al.** Physical activity as an aid to smoking cessation during pregnancy: two feasibility studies. 2008. 8:328 |
| **M. V. Auerbach, M. Lobel and D. T. Cannella.** Psychosocial correlates of health-promoting and health-impairing behaviors in pregnancy. 2014. 35:76-83 |
| **M. V. Bobic, D. Habek and J. C. Habek.** Perinatal epidemiological risk factors for preeclampsia. 2015. 54:9-13 |
| **M. Van Melick.** Working conditions and preterm birth in multiple pregnancies. *Obstet.Gynecol.* 2012. 206:S230 |
| **M. Van Poppel, N. Oostdam, M. Eekhoff and W. Van Mechelen.** Physical activity and maternal glucose and insulin in pregnant overweight and obese women. *Journal of Science and Medicine in Sport.* 2012. 15:S340 |
| **M. Varner.** Do subsequent pregnancies following the diagnosis of mild gestational diabetes increase the risk of maternal cardiometabolic disorders?. *Obstet.Gynecol.* 2016. 214:S169 |
| **M. W. Blackburn and D. H. Calloway.** Heart rate and energy expenditure of pregnant and lactating women. 1985. 42:1161-1169 |
| **M. W. Carpenter, S. P. Sady, B. Hoegsberg, et al.** Fetal heart rate response to maternal exertion. *JAMA.* 1988. 259:3006-3009 |
| **M. W. Carpenter, S. P. Sady, M. A. Sady, B. Haydon, D. R. Coustan and P. D. Thompson.** Effect of maternal weight gain during pregnancy on exercise performance. 1990. 68:1173-1176 |
| **M. W. Chang, S. Nitzke, D. Buist, D. Cain, S. Horning and K. Eghtedary.** I am pregnant and want to do better but i can't: focus groups with low-income overweight and obese pregnant women. 2015. 19:1060-1070 |
| **M. Xiang, M. Konishi, H. Hu, et al.** Reliability and Validity of a Chinese-Translated Version of a Pregnancy Physical Activity Questionnaire. *Maternal & Child Health Journal.* 2016. 25:25 |
| **M. Y. Takito and M. H. D. A. Benicio.** Physical activity during pregnancy and fetal outcomes: A case-control study. Portuguese]. *Rev.Saude Publica.* 2010. 44:90-101 |
| **M. Zeanah and S. P. Schlosser.** Adherence to ACOG guidelines on exercise during pregnancy: effect on pregnancy outcome. *JOGNN - Journal of Obstetric, Gynecologic, & Neonatal Nursing.* 1993. 22:329-335 |
| **Marci Lobel, Dolores Lacey Cannella, Jennifer E. Graham, Carla DeVincent, Jayne Schneider and Bruce A. Meyer.** Pregnancy-specific stress, prenatal health behaviors, and birth outcomes. *Health Psychology.* 2008. 27:604-615 |
| **Maria Zamora-Flyr.** Predictors of intention and performance of physical activity of pregnant Hispanic women. *Dissertation Abstracts International: Section B: The Sciences and Engineering.* 2011. 71:6077 |
| **Marianne Skreden, Nina C. Overby, Linda R. Sagedal, et al.** Change in active transportation and weight gain in pregnancy. *The International Journal of Behavioral Nutrition and Physical Activity Vol 13 2016, ArtID 10.* 2016. 13: |
| **Marushka Silveira, Penelope Pekow, Nancy Dole, Glenn Markenson and Lisa Chasan-Taber.** Correlates of High Perceived Stress Among Pregnant Hispanic Women in Western Massachusetts. 2013. 17:1138-1150 13 |
| **Miguel A. Diego, John N. Dieter, Tiffany Field, et al.** Fetal activity following stimulation of the mother's abdomen, feet and hands. *Dev.Psychobiol.* 2002. 41:396-406 |
| **Monika Guszkowska.** Physical activity in relation to affective states and labor anxiety in pregnant women. 2011. 15:114-118 |
| **N. A. Mohd-Shukri, A. Duncan, F. C. Denison, et al.** Health Behaviours during Pregnancy in Women with Very Severe Obesity. 2015. 7:8431-8443 |
| **N. Al-Azemi, M. F. Diejomaoh, E. Angelaki and A. T. Mohammed.** Clinical presentation and management of diabetes mellitus in pregnancy. 2014. 6: |
| **N. Barbari, L. May, E. Newton and J. Livingston.** Influence of exercise in pregnancy on fetal heart response during labor and delivery. *FASEB Journal.* 2014. 1): |
| **N. Boscaglia, H. Skouteris and E. H. Wertheim.** Changes in body image satisfaction during pregnancy: a comparison of high exercising and low exercising women. 2003. 43:41-45 |
| **N. C. Harvey, J. R. Poole, M. K. Javaid, et al.** Parental determinants of neonatal body composition. 2007. 92:523-526 |
| **N. C. Harvey, J. R. Poole, M. K. Javaid, et al.** PMC2080689 UKMS1164; Parental determinants of neonatal body composition. *Journal of Clinical Endocrinology & Metabolism.* 2007. 92:523-526 |
| **N. C. Harvey, M. K. Javaid, N. K. Arden, et al.** EMS28000 PMC3672833; Maternal predictors of neonatal bone size and geometry: the Southampton Women's Survey. *Journal of Developmental Origins of Health and Disease.* 2010. 1:35-41 |
| **N. C. Harvey, M. K. Javaid, N. K. Arden, et al.** Maternal predictors of neonatal bone size and geometry: the Southampton Women's Survey. 2010. 1:35-41 |
| **N. C. Nguyen, K. R. Evenson, D. A. Savitz, H. Chu, J. M. Thorp and J. L. Daniels.** NIHMS384562 PMC3459289; Physical activity and maternal-fetal circulation measured by Doppler ultrasound. *Journal of Perinatology.* 2013. 33:87-93 |
| **N. C. Rose, J. E. Haddow, G. E. Palomaki and G. J. Knight.** Self-rated physical activity level during the second trimester and pregnancy outcome. *Obstetrics & Gynecology.* 1991. 78:1078-1080 |
| **N. Cherry.** Physical demands of work and health complaints among women working late in pregnancy. *Ergonomics.* 1987. 30:689-701 |
| **N. D. Avery, K. D. Stocking, J. E. Tranmer, G. A. Davies and L. A. Wolfe.** Fetal responses to maternal strength conditioning exercises in late gestation. *Canadian Journal of Applied Physiology.* 1999. 24:362-376 |
| **N. D. Avery, L. A. Wolfe, C. E. Amara, G. A. Davies and M. J. McGrath.** Effects of human pregnancy on cardiac autonomic function above and below the ventilatory threshold. *J.Appl.Physiol.* 2001. 90:321-328 |
| **N. Daly, C. Mitchell, M. Farren, M. M. Kennelly, J. Hussey and M. J. Turner.** Maternal obesity and physical activity and exercise levels as pregnancy advances: an observational study. 2015. |
| **N. de Keyser, A. Josefsson, W. G. Monfils, et al.** Total cost comparison of standard antenatal care with a weight gain restriction programme for obese pregnant women. 2011. 125:311-317 |
| **N. H. Hjollund, T. K. Jensen, J. P. Bonde, et al.** Spontaneous abortion and physical strain around implantation: a follow-up study of first-pregnancy planners. 2000. 11:18-23 |
| **N. Hatoum, J. F. Clapp 3, M. R. Newman, N. Dajani and S. B. Amini.** Effects of maternal exercise on fetal activity in late gestation. *J.Matern.Fetal.* 1997. 6:134-139 |
| **N. J. Secher.** The Treatment of Obese Pregnant Women (TOP) study: a randomized controlled trial of the effect of physical activity intervention assessed by pedometer with or without dietary intervention in obese pregnant women. *Obstet.Gynecol.* 2014. 210:134.e1-134.e9 |
| **N. Khodiguian, S. V. Jaque-Fortunato, R. A. Wiswell and R. Artal.** A comparison of cross-sectional and longitudinal methods of assessing the influence of pregnancy on cardiac function during exercise. 1996. 20:232-241 |
| **N. M. Evensen, A. Kvale and I. H. Braekken.** Convergent validity of the Timed Up and Go Test and Ten-metre Timed Walk Test in pregnant women with pelvic girdle pain. *Man.Ther.* 2016. 21:94-99 |
| **N. M. Rafla and G. A. Etokowo.** The effect of maternal exercise on uterine artery velocimetry waveforms. *Journal of Obstetrics and Gynaecology.* 1998. 18:14-17 |
| **N. M. Rafla and J. M. Beazely.** The effect of maternal exercise on fetal umbilical artery waveforms. *European Journal of Obstetrics, Gynecology, & Reproductive Biology.* 1991. 40:119-122 |
| **N. M. Rafla and J. R. Cook.** The effect of maternal exercise on fetal heart rate. *Journal of Obstetrics & Gynaecology.* 1999. 19:381-384 |
| **N. M. Rafla and N. L. Whitelaw.** The effect of maternal exercise on fetal aortic blood flow. *Journal of Obstetrics and Gynaecology.* 1996. 16:342-346 |
| **N. M. Rafla.** The effect of maternal exercise on umbilical artery blood flow in insulin-dependent diabetics. *Journal of Obstetrics & Gynaecology.* 2000. 20:606-609 |
| **N. M. Rafla.** Umbilical artery flow velocity waveforms following maternal exercise. *Journal of Obstetrics and Gynaecology.* 1999. 19:385-389 |
| **N. Mamelle, I. Bertucat and F. Munoz.** Pregnant women at work: rest periods to prevent preterm birth?. *Paediatr.Perinat.Epidemiol.* 1989. 3:19-28 |
| **N. Morris, S. B. Osborn, H. Payling Wright and A. Hart.** Effective uterine blood-flow during exercise in normal and pre-eclamptic pregnancies. *The Lancet.* 1956. 268:481-484 |
| **N. Morris, S. B. Osborn, H. Payling Wright and A. Hart.** Effective uterine blood-flow during exercise in normal and pre-eclamptic pregnancies. 1956. 268:481-484 |
| **N. N. de Alcantara, S. H. O. Jardim, D. F. M. Vitorino and V. P. de Lima.** Influence of hydrotherapy in cardiorespiratory parameters during pregnancy. *Revista Neurociencias.* 2012. 20:372-378 |
| **N. Nelson, S. Jenkins, C. Lessard-Anderson and K. Borowski.** Exercise habits during pregnancy and correlation with weight gain and obstetric outcomes. *Obstet.Gynecol.* 2016. 127:153S |
| **N. Oostdam, J. Bosmans, M. G. Wouters, E. M. Eekhoff, W. van Mechelen and M. N. van Poppel.** Cost-effectiveness of an exercise program during pregnancy to prevent gestational diabetes: results of an economic evaluation alongside a randomised controlled trial. 2012. 12:64 |
| **N. Oostdam, van Poppel, M. N. M., Mgaj Wouters, et al.** No effect of the FitFor2 exercise programme on blood glucose, insulin sensitivity, and birthweight in pregnant women who were overweight and at risk for gestational diabetes: results of a randomised controlled trial. *Bjog-an International Journal of Obstetrics and Gynaecology.* 2012. 119:1098-1107 |
| **N. P. Joshi, S. R. Kulkarni, C. S. Yajnik, et al.** Increasing maternal parity predicts neonatal adiposity: Pune Maternal Nutrition Study. 2005. 193:783-789 |
| **N. Padmapriya, L. Shen, S. E. Soh, et al.** Physical Activity and Sedentary Behavior Patterns Before and During Pregnancy in a Multi-ethnic Sample of Asian Women in Singapore. *Matern.Child Health J.* 2015. 19:2523-2535 |
| **N. Padmapriya, L. Shen, S. E. Soh, et al.** Physical Activity and Sedentary Behavior Patterns Before and During Pregnancy in a Multi-ethnic Sample of Asian Women in Singapore. 2015. 19:2523-2535 |
| **N. Prabhu.** Effect of a exercise by pregnant women and birth weight: a randomized controlled trial. *Journal of Evolution of Medical and Dental Sciences-Jemds.* 2015. 4:1509-1516 |
| **N. Tafari, R. L. Naeye and A. Gobezie.** Effects of maternal undernutrition and heavy physical work during pregnancy on birth weight. *British Journal of Obstetrics & Gynaecology.* 1980. 87:222-226 |
| **N. Voldner, K. F. Froslie, K. Bo, et al.** Modifiable determinants of fetal macrosomia: role of lifestyle-related factors. *Acta Obstet.Gynecol.Scand.* 2008. 87:423-429 |
| **N. Voldner, K. F. Froslie, L. A. Haakstad, K. Bo and T. Henriksen.** Birth complications, overweight, and physical inactivity. 2009. 88:550-555 |
| **Nct, R. Barakat and M. Perales.** Effect of a Supervised Exercise Program During Whole Pregnancy on Outcomes and Level of Depression. A Randomized Controlled Trial. 2009. |
| **NDesai O. Singh.** Prevention and management of low backache in pregnant women through the use of exercise program and education booklet. 2008. 39:65-72 |
| **O. Kgosidialwa, A. M. Egan, L. Carmody, B. Kirwan, P. Gunning and F. P. Dunne.** Treatment With Diet and Exercise for Women With Gestational Diabetes Mellitus Diagnosed Using IADPSG Criteria. 2015. 100:4629-4636 |
| **O. M. Hellenes, T. Vik, G. C. Lohaugen, et al.** Regular moderate exercise during pregnancy does not have an adverse effect on the neurodevelopment of the child. *Acta Paediatrica.* 2015. 104:285-291 |
| **O. R. Anitha, S. Johncy and S. Y. Bondade.** Study of effect of exercise on PEFR in pregnant women. 2015. 5:89-92 |
| **O. Roldán, M. Perales, S. Mateos and R. Barakat.** Supervised physical activity during pregnancy improves fetal cardiac response. / el ejercicio físico supervisado durante el embarazo mejora la respuesta cardiaca fetal. *Revista Internacional de Medicina y Ciencias de la Actividad F.* 2015. 15:757-772 |
| **O. Taskin, J. M. Wheeler, A. I. Yalcinoglu and S. Coksenim.** The effects of episiotomy and Kegel exercises on postpartum pelvic relaxation: A prospective controlled study. 1996. 12:123-127 |
| **Olga S. Denda, Maria S. Denda, Anastasios X. Dalkiranis, Basiliki S. Lyssa and Mylonas Argyrios.** The effect of some dietary components on body weight and fat deposition in pregnant women in combination with exercise during pregnancy and postpartum period. 2005. 12:25-30 |
| **Oliveria Melo de, J. L. Silva, J. S. Tavares, V. O. Barros, D. F. Leite and M. M. Amorim.** Effect of a physical exercise program during pregnancy on uteroplacental and fetal blood flow and fetal growth: a randomized controlled trial. *Obstetrics & Gynecology.* 2012. 120:302-310 |
| **P. A. Nixon, L. K. Washburn, L. M. Mudd, et al.** Aerobic fitness and physical activity levels of children born prematurely following randomization to postnatal dexamethasone. *J.Pediatr.* 2011. 158:113-118 |
| **P. Abirami and A. Judie.** Integrated approach of yoga therapy on maternal and fetal outcome in gestational diabetes mellitus. *International Journal of Pharmaceutical and Clinical Research.* 2015. 7:377-382 |
| **P. Abirami and A. Judie.** Reduction of risk on newly detected gestational diabetes mellitus by multi model intervention - A hospital based study. 2014. 6:370-374 |
| **P. Bahadoran and S. Mohamadirizi.** PMC4387656; Relationship between physical activity and quality of life in pregnant women. *Iranian Journal of Nursing and Midwifery Research.* 2015. 20:282-286 |
| **P. Bahadoran and S. Mohamadirizi.** PMC4946278; The study of physical activity and some relative factors in referred pregnant women to Isfahan Health-Care Centers and Shahid Beheshti Hospital. *Journal of Education & Health Promotion.* 2015. 4:100 |
| **P. Bahadoran and S. Mohamadirizi.** Relationship between physical activity and quality of life in pregnant women. 2015. 20:282-286 |
| **P. Bahadoran, F. Pouya, V. Zolaktaf and M. Taebi.** The effect of stretching exercise and walking on changes of blood pressure in nulliparous women. 2015. 20:205-210 |
| **P. Bergamaschi, E. Capodaglio and B. Fre.** Cardio-respiratory and metabolic aspects of muscular work in pregnancy. Italian]. *Minerva Ginecol.* 1964. 16:831-838 |
| **P. Bonnin, C. Bazzi-Grossin, N. Ciraru-Vigneron, et al.** Evidence of fetal cerebral vasodilatation induced by submaximal maternal dynamic exercise in human pregnancy. *J.Perinat.Med.* 1997. 25:63-70 |
| **P. Bung, C. Bung, R. Artal, N. Khodiguian, F. Fallenstein and L. Spatling.** Therapeutic exercise for insulin-requiring gestational diabetics: effects on the fetus--results of a randomized prospective longitudinal study. *J.Perinat.Med.* 1993. 21:125-137 |
| **P. C. Ko, C. C. Liang, S. D. Chang, J. T. Lee, A. S. Chao and P. J. Cheng.** A randomized controlled trial of antenatal pelvic floor exercises to prevent and treat urinary incontinence. 2011. 22:17-22 |
| **P. C. Santos, S. Abreu, C. Moreira, et al.** Impact of compliance with different guidelines on physical activity during pregnancy and perceived barriers to leisure physical activity. 2014. 32:1398-1408 |
| **P. C. Santos, S. Abreu, C. Moreira, et al.** PMC4884625; Physical Activity Patterns During Pregnancy in a Sample of Portuguese Women: A Longitudinal Prospective Study. *Iranian Red Crescent Medical Journal.* 2016. 18:e22455 |
| **P. D. Loprinzi, E. M. Fitzgerald, E. Woekel and B. J. Cardinal.** Association of physical activity and sedentary behavior with biological markers among U.S. pregnant women. 2013. 22:953-958 |
| **P. D. Loprinzi, K. L. Loprinzi and B. J. Cardinal.** The relationship between physical activity and sleep among pregnant women. 2012. 5:22-27 |
| **P. Dwarkanath, S. Muthayya, M. Vaz, et al.** The relationship between maternal physical activity during pregnancy and birth weight. *Asia Pac.J.Clin.Nutr.* 2007. 16:704-710 |
| **P. E. Clarke and H. Gross.** Women's behaviour, beliefs and information sources about physical exercise in pregnancy. *Midwifery.* 2004. 20:133-141 |
| **P. E. Clarke, E. K. Rousham, H. Gross, A. W. Halligan and P. Bosio.** Activity patterns and time allocation during pregnancy: a longitudinal study of British women. 2005. 32:247-258 |
| **P. E. Watson and B. W. McDonald.** Activity levels in pregnant New Zealand women: relationship with socioeconomic factors, well-being, anthropometric measures, and birth outcome. *Applied Physiology, Nutrition, & Metabolism = Physiologie Appliquee, Nutrition et Metabolisme.* 2007. 32:733-742 |
| **P. Eisenberg de Smoler, C. Dominguez de Costa, R. Mejia de Cabrera and S. Karchmer.** [External fetal electrocardiography, the maternal effort test and the oxytocin challenge in cases of fetomaternal rhesus isoimmunisation (author's transl)]. 1979. 8:137-142 |
| **P. Ewings, S. Spencer, H. Marsh and M. O'Sullivan.** Obstetric risk factors for urinary incontinence and preventative pelvic floor exercises: cohort study and nested randomized controlled trial.Erratum appears in J Obstet Gynaecol. 2005 Nov;25(8):834-5]. *Journal of Obstetrics & Gynaecology.* 2005. 25:558-564 |
| **P. G. Lindqvist, K. Marsal, J. Merlo and J. P. Pirhonen.** Thermal response to submaximal exercise before, during and after pregnancy: a longitudinal study. *Journal of Maternal-Fetal & Neonatal Medicine.* 2003. 13:152-156 |
| **P. Gawade, P. Pekow, G. Markenson, M. Plevyak, W. Goh and L. Chasan-Taber.** Physical activity before and during pregnancy and duration of second stage of labor among Hispanic women. *J.Reprod.Med.* 2009. 54:429-435 |
| **P. J. Kulpa, B. M. White and R. Visscher.** Aerobic exercise in pregnancy. *American Journal of Obstetrics & Gynecology.* 1987. 156:1395-1403 |
| **P. J. O'Connor, M. S. Poudevigne, M. E. Cress, R. W. Motl and J. F. Clapp 3rd.** Safety and efficacy of supervised strength training adopted in pregnancy. 2011. 8:309-320 |
| **P. J. Ohtake and L. A. Wolfe.** Physical conditioning attenuates respiratory responses to steady-state exercise in late gestation. *Med.Sci.Sports Exerc.* 1998. 30:17-27 |
| **P. J. Reis and M. R. Alligood.** Prenatal yoga in late pregnancy and optimism, power, and well-being. 2014. 27:30-36 |
| **P. Kolu, J. Raitanen, P. Rissanen and R. Luoto.** Cost-effectiveness of lifestyle counselling as primary prevention of gestational diabetes mellitus: findings from a cluster-randomised trial. 2013. 8:e56392 |
| **P. L. Chou, F. P. Chen and L. F. Teng.** Factors associated with urinary stress incontinence in primiparas. *Taiwanese Journal of Obstetrics and Gynecology.* 2005. 44:42-47 |
| **P. L. Rice and I. L. Fort.** The relationship of maternal exercise on labor, delivery and health of the newborn. *Journal of Sports Medicine & Physical Fitness.* 1991. 31:95-99 |
| **P. L. Thornton, E. C. Kieffer, Y. Salabarria-Pena, et al.** Weight, diet, and physical activity-related beliefs and practices among pregnant and postpartum Latino women: the role of social support. *Maternal & Child Health Journal.* 2006. 10:95-104 |
| **P. M. Catalano, K. Farrell, A. Thomas, et al.** Perinatal risk factors for childhood obesity and metabolic dysregulation. 2009. 90:1303-1313 11 |
| **P. Magnus, L. Trogstad, K. M. Owe, S. F. Olsen and W. Nystad.** Recreational physical activity and the risk of preeclampsia: a prospective cohort of Norwegian women. 2008. 168:952-957 |
| **P. Moreira, C. Padez, I. Mourao-Carvalhal and V. Rosado.** Maternal weigh gain during pregnancy and overweight in Portuguese children. *Int.J.Obes.* 2007. 31:608-614 |
| **P. Mota, A. G. Pascoal, A. I. Carita and K. Bo.** The Immediate Effects on Inter-rectus Distance of Abdominal Crunch and Drawing-in Exercises During Pregnancy and the Postpartum Period. 2015. 45:781-788 |
| **P. N. Horns, L. P. Ratcliffe, J. C. Leggett and M. S. Swanson.** Pregnancy outcomes among active and sedentary primiparous women. *JOGNN - Journal of Obstetric, Gynecologic, & Neonatal Nursing.* 1996. 25:49-54 |
| **P. Rodrigues, E. Yamada, C. Simmer, K. Santos, K. Rangel and L. Prudente.** Efficacy of therapeutic exercises and superficial heat in the posterior lumbar pelvic pain during pregnancy. *Physiotherapy (United Kingdom).* 2011. 97:eS1050-eS1051 |
| **P. S. Alm, A. Krook and T. D. Barbosa.** Maternal obesity legacy: exercise it away!. *Diabetologia.* 2016. 59:5-8 |
| **P. S. Larsen, K. Strandberg-Larsen, M. Juhl, S. W. Svendsen, J. P. Bonde and A. M. Andersen.** Occupational lifting and pelvic pain during pregnancy: a study within the Danish National Birth Cohort. 2013. 39:88-95 |
| **P. S. Rusinski.** The employed pregnant worker: the risks of physical exertion. 1981. 29:19-21 |
| **P. Sedaghati, V. Ziaee and A. Ardjmand.** The effect of an ergometric training program on pregnants weight gain and low back pain. *Gazzetta Medica Italiana Archivio per le Scienze Mediche.* 2007. 166:209-213 |
| **P. Tuntiseranee, A. Geater, V. Chongsuvivatwong and O. Kor-anantakul.** The effect of heavy maternal workload on fetal growth retardation and preterm delivery. A study among southern Thai women. *Journal of Occupational & Environmental Medicine.* 1998. 40:1013-1021 |
| **P. Van Leeuwen, K. M. Gustafson, D. Cysarz, D. Geue, L. E. May and D. Gronemeyer.** PMC4146588; Aerobic exercise during pregnancy and presence of fetal-maternal heart rate synchronization. *PLoS ONE Electronic Resource].* 2014. 9:e106036 |
| **P. W. Bauer, J. M. Pivarnik, D. L. Feltz, N. Paneth and C. J. Womack.** Relationship of Past-Pregnancy Physical Activity and Self-efficacy With Current Physical Activity and Postpartum Weight Retention. 2014. 8:68-73 |
[truncated: 222,519 more chars]
